# Supplementary material for: Trends in Staphylococcus aureus bacteraemia and impacts of infection control practices including universal MRSA admission screening in a hospital in Scotland, 2006–2010: retrospective cohort study and time-series intervention analysis
Source: PubMed Central journal article supplement — BMJ Open. 2012 Jun 8;2(3):e000797. doi: 10.1136/bmjopen-2011-000797 (PMC3378947; doi:10.1136/bmjopen-2011-000797), 2012-06-08
Supplement: bmjopen-2011-000797-s1.pdf [file bmjopen-2011-000797-s1.pdf]

Supplemental file 2: Admission screening strategy during universal surveillance

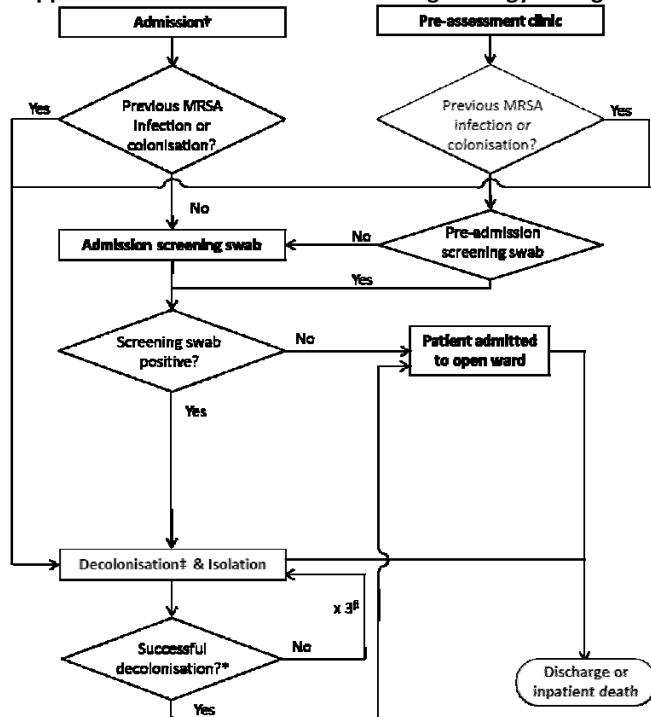

† Overnight admissions to acute specialities excluding paediatrics, obstetrics and psychiatry. ‡ Decolonisation involved 5-days of once-daily antiseptic body wash and thrice-daily mupirocin nasal ointment. \* Successful decolonisation assessed as three successive negative swabs  $\geq 2$  days post-decolonisation period.  $\beta$  If failure to decolonise after three attempts, referral to clinical microbiologist advised. Adapted from reference (30).
