# Supplementary material for: Trends in Staphylococcus aureus bacteraemia and impacts of infection control practices including universal MRSA admission screening in a hospital in Scotland, 2006–2010: retrospective cohort study and time-series intervention analysis
Source: PubMed Central journal article supplement — BMJ Open. 2012 Jun 8;2(3):e000797. doi: 10.1136/bmjopen-2011-000797 (PMC3378947; doi:10.1136/bmjopen-2011-000797), 2012-06-08
Supplement: bmjopen-2011-000797-s3.pdf [file bmjopen-2011-000797-s3.pdf]

**Supplemental file 3: Secular trends in mean patient age, length-of-stay and % bed occupancy by department and month**

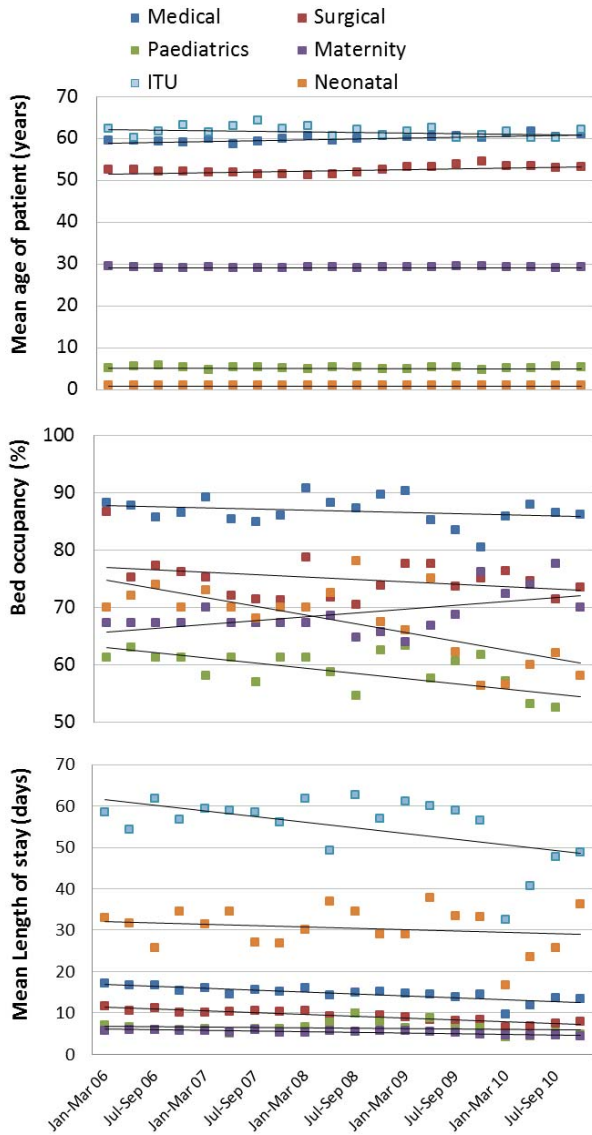

Data summarised in three-month blocks. Lines represent linear regressions
