# Supplementary material for: Trends in Staphylococcus aureus bacteraemia and impacts of infection control practices including universal MRSA admission screening in a hospital in Scotland, 2006–2010: retrospective cohort study and time-series intervention analysis
Source: PubMed Central journal article supplement — BMJ Open. 2012 Jun 8;2(3):e000797. doi: 10.1136/bmjopen-2011-000797 (PMC3378947; doi:10.1136/bmjopen-2011-000797), 2012-06-08
Supplement: bmjopen-2011-000797.draft_revisions.pdf [file bmjopen-2011-000797.draft_revisions.pdf]

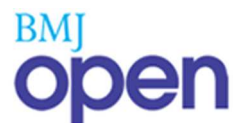

**Trends in *Staphylococcus aureus* bacteraemia and impacts of universal MRSA admission screening in a hospital in Scotland, 2006-2010: retrospective cohort study and time-series intervention analysis**

|                                 |                                                                                                                                                                                                                                              |
|---------------------------------|----------------------------------------------------------------------------------------------------------------------------------------------------------------------------------------------------------------------------------------------|
| Journal:                        | <i>BMJ Open</i>                                                                                                                                                                                                                              |
| Manuscript ID:                  | bmjopen-2011-000797                                                                                                                                                                                                                          |
| Article Type:                   | Research                                                                                                                                                                                                                                     |
| Date Submitted by the Author:   | 03-Jan-2012                                                                                                                                                                                                                                  |
| Complete List of Authors:       | Lawes, Timothy; Raigmore Hospital, Paediatrics<br>Edwards, Becky; Aberdeen Royal Infirmary, Medical Microbiology<br>López-Lozano, José-Maria; Hospital Vega Baja, Epidemiology<br>Gould, Ian; Aberdeen Royal Infirmary, Medical Microbiology |
| <b>Primary Subject Heading</b>: | Infectious diseases                                                                                                                                                                                                                          |
| Secondary Subject Heading:      | Epidemiology, Public health                                                                                                                                                                                                                  |
| Keywords:                       | Infection control < INFECTIOUS DISEASES, Epidemiology < INFECTIOUS DISEASES, MICROBIOLOGY                                                                                                                                                    |
|                                 |                                                                                                                                                                                                                                              |

SCHOLARONE™  
Manuscripts

1  
2  
3 **Trends in *Staphylococcus aureus* bacteraemia and impacts of universal MRSA**  
4 **admission screening in a hospital in Scotland, 2006-2010: retrospective**  
5 **cohort study and time-series intervention analysis**  
6  
7

8 Timothy Lawes, Becky Edwards, José-Maria López-Lozano, Ian M Gould  
9

10 **Keywords:** Methicillin Resistance, Staphylococcus aureus, bacteraemia, mass screening, intervention  
11 studies, cohort studies, inpatients  
12

13 **Authors:**

14 Timothy Lawes:

15 Department of Paediatrics, Raigmore Hospital, Inverness, UK.  
16

17 Foundation year 2 (FY2) doctor.  
18  
19

20 Becky Edwards:

21 Department of Medical Microbiology, Aberdeen Royal Infirmary, Foresterhill Road, Aberdeen, UK.  
22 Specialist registrar in Medical Microbiology  
23  
24

25 José-Maria López-Lozano:

26 Department of Epidemiology, Hospital Vega Baja, Orihuela (Alicante), Spain.  
27 Chief of Preventive Medicine Unit.  
28  
29

30 Ian M Gould:

31 Department of Medical Microbiology, Aberdeen Royal Infirmary, Foresterhill Road, Aberdeen, UK.  
32 Consultant in Medical Microbiology.  
33  
34

35 Correspondence to: Timothy Lawes. Email: [t.lawes@nhs.net](mailto:t.lawes@nhs.net). Tel +44 (0) 1224 554951; Fax +44 (0)  
36 1224 550632  
37  
38

39 **Copyright :** The Corresponding Author has the right to grant on behalf of all authors and does grant  
40 on behalf of all authors, a worldwide licence to the Publishers and its licensees in perpetuity, in all  
41 forms, formats and media (whether known now or created in the future), to i) publish, reproduce,  
42 distribute, display and store the Contribution, ii) translate the Contribution into other languages,  
43 create adaptations, reprints, include within collections and create summaries, extracts and/or,  
44 abstracts of the Contribution, iii) create any other derivative work(s) based on the Contribution, iv)  
45 to exploit all subsidiary rights in the Contribution, v) the inclusion of electronic links from the  
46 Contribution to third party material where-ever it may be located; and, vi) licence any third party to  
47 do any or all of the above.  
48  
49

50 **Word Count:**

51 *Abstract* : 298

52 *Background* : 356

53 *Methods* : 1398

54 *Results* : 1100

55 *Discussion* : 1474

56 *Main Manuscript (excluding abstract)* : **4328**  
57  
58  
59  
60

**ARTICLE SUMMARY****Article focus**

- This study describes the changing epidemiology of MRSA and MSSA bacteraemia in a large inpatient population from Scotland over a five year period
- Secondly, it evaluates the impact of universal MRSA admission screening on hospital-wide rates of MRSA bacteraemia.

**Key messages:**

- Recent declines in clinical burdens from *S.aureus* bacteraemia in North East Scotland were attributable to a reduction in invasive MRSA infections.
- Compared to a strategy of targeted screening in high-risk environments, universal admission screening may significantly reduce rates of MRSA bacteraemia and associated early mortality.
- Strategies to reduce clinical burdens from MSSA bacteraemia are required if progress towards national targets for all *S.aureus* bacteraemia is to be sustained.

**Strengths and limitations**

- Without a contemporary control, this study did not prove causality but an association between universal admission screening and rates of MRSA bacteraemia.
- ARIMA modelling accounted for the non-independence of data and stochastic elements in time-series of infections, and the dynamic effects of changes in other aspects of care.
- Findings may be limited to large public hospitals with intensive care units and endemic MRSA but low rates of MRSA infection.

## ABSTRACT

**Objectives:** To describe secular trends in *Staphylococcus aureus* bacteraemia in an inpatient population, and to assess the impact of universal MRSA admission screening on MRSA bacteraemia.

**Design:** Retrospective cohort study linking microbiology, patient management and health intelligence databases and time series intervention analysis using transfer function modelling.

**Setting:** Teaching hospital in North East Scotland.

**Population:** All patients admitted to Aberdeen Royal Infirmary between 1<sup>st</sup> January 2006 and 31<sup>st</sup> December 2010: N = 420,452 admissions and 1,430,052 acute occupied bed days (AOBDs).

**Intervention:** Universal admission screening programme for MRSA introduced in August 2008 (NHS Scotland pathfinder project), incorporating isolation and selective decolonisation.

**Main outcome measures:** Hospital-wide prevalence density, hospital-associated incidence density and death within 30 days of MRSA or MSSA bacteraemia.

**Results:** Prevalence density of all *S. aureus* bacteraemia declined by 41% from 0.73 to 0.50 cases 1000 AOBDs<sup>-1</sup> ( $P=0.002$  for trend) and 30-day mortality from 26% to 14% ( $P=0.013$ ) between 2006 and 2010. Significant reductions were observed in MRSA bacteraemia only. The percentage of overnight admissions screened for MRSA rose from 43% at baseline (selective screening) to over 90% within four months of universal surveillance, with 3.1% colonised or infected at admission. In transfer function models accounting for changes in other aspects of care, universal screening was associated with a 28% reduction in prevalence density of MRSA bacteraemia (-0.053 cases 1000 AOBDs<sup>-1</sup>;  $P<0.001$ ); a 62% fall in hospital-associated incidence density (-0.062 cases 1000 AOBDs<sup>-1</sup>;  $P=0.014$ ) and a 56% reduction in 30-day mortality (-18.8%;  $P=0.021$ ). Rates of MSSA bacteraemia were unaffected.

**Conclusions:** Declining clinical burdens from *S. aureus* bacteraemia were attributable to reductions in MRSA infections. Universal MRSA admission screening was associated with a decrease in MRSA bacteraemia and associated early mortality. Control of MSSA bacteraemia remains an important priority in Scotland.

## INTRODUCTION

*Staphylococcus aureus* is an important cause of serious, invasive, and health care-associated infections worldwide.[1] In high-income countries it remains a leading cause of community and nosocomial bacteraemia,[2] associated with mortality rates of 20-50%,[3,4] and large economic burdens.[5] In the UK, dramatic increases in *S. aureus* bacteraemia (SAB) during the 1990s were attributed to methicillin resistant *S. aureus* (MRSA)[3,6] and healthcare exposures,[7] engendering aggressive public health responses.[8] A decade of national mandatory surveillance of both methicillin sensitive *Staphylococcus aureus* (MSSA) and MRSA bacteraemia has suggested impacts from infection control measures,[9,10] but there remains over 12,000 cases annually.[11,12]

Despite a steep reduction in MRSA bacteraemia from a peak in 2003/4, rates of MSSA bacteraemia have remained relatively stable.[11,12] Reasons for this MRSA specific decline are not fully understood.[9,10] Meanwhile, studies assessing the importance of methicillin resistance to outcomes after SAB have yielded conflicting results.[3,4,13-18] These uncertainties are reflected in different public health approaches: England and Wales implemented performance targets for reducing MRSA bacteraemia only,[9] while NHS Scotland's strategy aimed to reduce all SAB to 70% of 2005/6 by 2010.[19] Some authors have warned that policy focusing on MRSA alone, may have unintended adverse effects on control of MSSA.[20] It is therefore important to understand the evolving epidemiology of both MRSA and MSSA bacteraemia.[21]

UK policy on reducing burdens from MRSA has advocated admission screening, with subsequent decolonisation and isolation, despite weaknesses in evidence.[22-25] Studies on MRSA screening have generally assessed impacts on bacteraemia by surveillance in high-risk groups,[26,27] while studies of universal surveillance have taken all MRSA infections as the primary outcome.[25,28] In 2008, a universal screening strategy was piloted in three NHS Scotland trusts[29,30] providing an opportunity to assess effects on rates of MRSA bacteraemia, compared to a previous strategy of selective screening in high-risk environments.

This study aimed to describe the changing clinical epidemiology of SAB in a large inpatient population over a five year period, and to evaluate the impact of introducing universal MRSA admission screening on MRSA bacteraemia. Our pre-specified null-hypothesis was that universal screening would not significantly reduce rates of bacteraemia, after accounting for prior trends and changes in other aspects of care.

1  
2  
3 70 **METHODS**

4  
5 71

6  
7 72 **Study design:**

8 73 This retrospective cohort study described secular trends in *S.aureus* bacteraemia in all admissions to  
9  
10 74 Aberdeen Royal Infirmary (ARI) between 2006 and 2010. A quasi-experimental before-and-after  
11  
12 75 design used time series data from the same period to assess the impact of introducing universal  
13  
14 76 admission surveillance on MRSA bacteraemia (fig 1). Controls were historic trends in MRSA  
15  
16 77 bacteraemia and concurrent trends in MSSA bacteraemia.

17 78

18 79 **Setting:**

19 80 ARI is a tertiary referral centre and acute teaching hospital (1000 beds, 85,000 annual admissions),  
20  
21 81 serving a population of 500,000 in North East Scotland (*NHS Grampian*). It provides a full range of  
22  
23 82 acute medical and surgical services with a 16-bedded intensive care unit (800 admissions yr<sup>-1</sup>) and a  
24  
25 83 cardiac intensive care unit (6 beds, 600 admissions yr<sup>-1</sup>). Microbiology services also serve the on-site  
26  
27 84 185-bedded maternity and 85-bedded children's hospitals.

28 85

29 86 **Admission Screening Intervention:**

30  
31 87 Universal admission screening for MRSA was introduced in NHS Grampian in August 2008 as part of  
32  
33 88 an NHS Scotland pathfinder project detailed elsewhere.[29,30] This one year pilot study tested a  
34  
35 89 strategy suggested as most clinically- and cost-effective by an NHS Scotland Health Technology  
36  
37 90 Assessment (supplemental file 1).[29] This involved, screening of all overnight admissions to acute  
38  
39 91 specialities (excluding obstetrics, paediatrics and psychiatry) by nasal (and wound or device as  
40  
41 92 necessary) swabs; isolation or cohorting of all patients with known or new colonisation or infection  
42  
43 93 with MRSA; and decolonising of MRSA-positive patients admitted to 'high-risk' specialities.  
44  
45 94 Decolonisation therapy included five days of daily bodywash with 4% chlorhexidine gluconate and  
46  
47 95 thrice-daily mupirocin nasal ointment. Patients were re-swabbed a minimum of two-days after  
48  
49 96 decolonisation and could be removed from isolation on receipt of three successive negative swabs,  
50  
51 97 taken ≥48 hours apart. Elective patients were screened at pre-admission assessment or on  
52  
53 98 admission. Compliance with screening and infection control protocols was monitored. Prior to the  
54  
55 99 intervention MRSA screening was performed on selected high-risk patients only, including intensive  
56  
57 100 care and elective surgical admissions, with an identical strategy of isolation and decolonisation.

58 101

59 102

60 103

1  
2  
3 104 **Outcomes and potential confounders:**

4 105 *S.aureus* bacteraemia was defined as the isolation of any *S. aureus* from  $\geq 1$  blood culture bottle.

5  
6 106 Cultures from the same patient within 14 days of the original isolate were considered to represent  
7 107 the same episode. Patients could be included more than once in analysis for different episodes.

8  
9 108 Hospital-associated (HA-) bacteraemia was defined as isolation of *S. aureus* from blood cultures > 48  
10 109 hours after admission or within 14 days of discharge.

11 110

12 111 The primary outcome measure was prevalence density of MRSA and MSSA bacteraemia (all cases of  
13 112 bacteraemia per 1000 acute occupied bed days, AOBDDs). Secondary outcomes are detailed in box 1.

14 113 Secular trends in longer-term outcomes were also investigated with recurrence expressed as  
15 114 episodes per 1000 patient-months to avoid follow-up bias.

16 115

17 116 In examining secular trends and the impacts of universal MRSA admission screening, we considered  
18 117 changes in other aspects of care and case-mix including: length-of-stay,[3,13] bed-occupancy,[7]  
19 118 patient age,[3,4,13] admitting department,[3] hand-hygiene,[9] and antibiotic usage.[31-33]

20 119

21  
22  
23  
24  
25  
26  
27  
28  
29 **Box 1: Definitions of outcomes**

- 30  
31  
32  
33  
34  
35  
36  
37  
38  
39  
40  
41  
42  
43
- **Prevalence** =  $\frac{\text{All episodes of } S. aureus \text{ bacteraemia (SAB)} \times 1000}{\text{All admissions}}$
  - **Prevalence density** =  $\frac{\text{All episodes of } S. aureus \text{ bacteraemia}}{\text{Acute Occupied Bed Days}} \times 1000$
  - **Hospital associated incidence** =  $\frac{\text{First ever episode of SAB } > 48 \text{ hrs of admission}}{\text{All admissions } \geq 48 \text{ hours}} \times 1000$
  - **Hospital-associated incidence density** =  $\frac{\text{First ever episode of SAB } > 48 \text{ hrs of admission}}{\text{Acute Occupied Bed Days}} \times 1000$
  - **30-day mortality** - deaths from any cause within 30 days of SAB irrespective of discharge status.
  - **Inpatient mortality** - deaths from any cause within the same hospital admission, without intervening discharge. Transfers without discharge were included as a single admission episode.
  - **Readmission** – readmission to inpatient care at any hospital within 14 days of discharge from admission in which *S. aureus* bacteraemia occurred.
  - **Treatment failure** – any repeat blood culture isolate of *S.aureus* within 6 months of initial isolate.
  - **Recurrence** – repeat blood culture isolate of *S.aureus* with the same susceptibility to methicillin after 6 months or more from initial isolate.

44 120

45 121

46 122 **Study population**

47 123 All patients admitted to medical, surgical, paediatric, and maternity services at ARI between 1<sup>st</sup>

48 124 January 2006 and 31<sup>st</sup> December 2010 were eligible for inclusion in the study. This period was

49 125 chosen as it included the time frame stated in national targets for reducing rates of SAB. A time

50 126 series of 60 months with equivalent baseline and intervention periods (31 and 29 months), also

51 127 facilitated a robust time-series analysis.[34] Outpatients in all specialities were excluded. Admissions

52 128 resulting in death or discharge within 24 hours were retained in the main analysis so as to capture

53 129 burdens from community-associated bacteraemia. Patients at risk of incident hospital-associated

54 130 bacteraemia were those hospitalised for at least 48 hours without previous documented SAB. Follow

55  
56  
57  
58  
59  
60

1  
2  
3 131 up was until in-hospital death, 180 days from bacteraemia or a minimum of two weeks post-  
4 132 discharge (whichever was longest), and ended on 15<sup>th</sup> June 2011.

5  
6 133

7  
8 134 **Data collection**

9 135 Electronic laboratory records were screened to identify admission screening swabs, previous or  
10 136 current MRSA colonisation or infection, episodes of *S.aureus* bacteraemia and location of sampling.  
11 137 Patient identifiers were used to identify multiple samples from the same patient.

12  
13 138

14 139 Health intelligence databases provided data on demographics, admission details and mortality for all  
15 140 admissions between 2006 and 2010. Aggregated data on bed-occupancy were also provided by  
16 141 month and department. For episodes of bacteraemia, data were triangulated using the hospital's  
17 142 Patient Management System. Numbers of admissions within the last 12 months and age were taken  
18 143 as a proxy of patients' baseline health.

19  
20 144

21 145 Details on the percentage of antibiotic defined daily doses (DDDs) involving "4C" antibiotics  
22 146 (Ciprofloxacin, Cephalosporins, Clindamycin, Co-amoxiclav) and hand-hygiene (Litres of alcohol gel  
23 147 dispensed per 1000 AOBDS) were ascertained from pharmacy and infection control departments.

24  
25 148

26 149 Use of routinely collected data meant an almost complete dataset. Data on outcomes after  
27 150 discharge were missing for six patients (0.7%) with SAB and for obstetric or neonatal inpatients.  
28 151 Outcomes were explored using a complete-case analysis of departments with complete data. Data  
29 152 on antibiotic use and hand-hygiene were only available from April 2007 and April 2008 respectively  
30 153 and were therefore not introduced as a dynamic explanatory factor in time-series analysis.

31  
32 154

33 155 **Laboratory methods:**

34 156 Screening swabs were tested by latex slide test after plating on chromogenic agar (Brilliance - Oxoid,  
35 157 UK), followed by confirmatory coagulase test. Antibiotic sensitivities were evaluated by disc-  
36 158 diffusion test. After confirmation by laboratory staff, results were made immediately available on an  
37 159 electronic laboratory reporting system. Positive MRSA screens were verbally reported to nursing  
38 160 staff on relevant wards and infection control teams. Turnaround time was typically <24 hours.

39  
40 161

41 162 All *S.aureus* blood isolates were identified initially by agglutination, using the Prolex<sup>TM</sup> – Blue Staph  
42 163 Latex Kit (Pro-Lab), and subsequently by a Vitek<sup>TM</sup> instrument, using custom made Staphylococcus  
43 164 sensitivity cards (Biomérieux).



1  
2  
3 165 **Statistical analysis**  
4

5 166

6 167 Clinical epidemiology and secular trends:  
7

8 168

9 169 Comparisons between characteristics of MRSA and MSSA and non-bacteraemic inpatient cohorts  
10 were made by  $\chi^2$ , Mann-Whitney U or independent-samples *t*-tests. Univariate linear or logistic  
11 regression was used to model associations between risk factors and rates of SAB. An indirect  
12 standardised mortality ratio (SMR) was calculated to explore excess mortality in SAB, using all ARI  
13 inpatients between 2006 and 2010 as the reference population, and standardising by age, gender  
14 and speciality. Attributable mortality, defined as the excess mortality caused by bacteraemia, was  
15 calculated using matched controls from this inpatient reference group, as crude mortality rate in  
16 controls *minus* crude mortality rate after bacteraemia.  
17  
18

19 177

20 178 Restricting analysis to the *S.aureus* bacteraemia cohort, determinants of 30-day mortality were  
21 explored by multivariate logistic regression. *A priori* determinants of methicillin sensitivity, month  
22 and demographics were included in a multivariate model alongside significant variables from  
23 univariate analysis ( $p < 0.10$ ). Interaction terms were generated for terms significantly associated by  
24 Spearman rank correlation but retained only where contributing to model fit. Competing hazards of  
25 inpatient mortality and being discharged alive were further explored with multivariate Cox-  
26 regression, with censoring at date of discharge or death respectively. Length of stay was included as  
27 a time-dependent determinant of mortality after SAB.[16]  
28  
29

30 186

31 187 Secular trends in demographics and clinical characteristics of *S. aureus* bacteraemia cohorts, were  
32 evaluated by logistic or linear regressions, with month of isolate as the sole explanatory variable.  
33 Trends in rates were examined using Poisson regression, with Poisson distribution, log-link function  
34 and Ln(AOBDs) as the offset. Monthly count of bacteraemia or death was the dependent variable  
35 and month of study the independent variable. Multivariate Poisson regression models assessed  
36 secular trends after adjusting for changes in case-mix.  
37  
38

39 193

40 194 Impacts of universal MRSA admission screening:  
41

42 195

43 196 We conducted intervention analyses to model the effects of universal screening and dynamic  
44 explanatory factors on MRSA bacteraemia using the Linear Transfer Function identification method  
45 suggested by Pankratz.[35] After ensuring stationary series, an initial transfer function model was  
46  
47  
48  
49  
50  
51  
52  
53  
54  
55  
56  
57  
58  
59  
60

1  
2  
3 199 created, with 6 lags for all explanatory variables and an autoregressive term of order 1. An iterative  
4 200 process of eliminating non-significant terms, and identifying further autoregressive or moving  
5 201 average terms for parts of the model remaining unexplained, determined the most parsimonious LTF  
6 202 model. Model parameters were estimated using unconditional least squares and goodness-of-fit  
7 203 evaluated by  $R^2$ . Finally, diagnostic checks were used to determine whether models adequately  
8 204 represented times series data. These included checking; the statistical significance of parameters, AR  
9 205 parameter stationarity and MA parameter invertibility, and ACF and PACF of residuals to ensure  
10 206 remaining variability was random. Analysis of concurrent trends in MSSA bacteraemia controlled for  
11 207 unidentified aspects of care or infection control affecting the clinical epidemiology of SAB.  
12 208  
13 209 Intervention analysis was conducted using SCA software (Chicago, IL, USA, 1992) as described by Liu  
14 210 and Hudak.[36] All other analyses were performed using SPSS 19.0 for windows.  
15 211  
16 212  
17 213  
18 214  
19 215  
20 216  
21 217  
22 218  
23 219  
24 220  
25 221  
26 222  
27 223  
28 224  
29 225  
30 226  
31 227  
32 228  
33 229  
34 230  
35 231  
36 232  
37 233  
38 234  
39 235  
40 236  
41  
42  
43  
44  
45  
46  
47  
48  
49  
50  
51  
52  
53  
54  
55  
56  
57  
58  
59  
60

237 **RESULTS**

238

239 **Descriptive epidemiology**

240

241 Cohort and rates of *S.aureus* bacteraemia:

242

243 There were 430,452 admissions to ARI between 2006 and 2010 representing 1,430,052 acute  
 244 occupied bed days (8% in ICU). The total number of days of follow-up was 7,578,805: median, 181  
 245 days (range 180 to 355 days) for episodes of SAB, and 16 days (14 to 129 days) for other admissions.

246

247 867 episodes of *S. aureus* bacteraemia were identified in 795 patients, including 208 cases of MRSA  
 248 bacteraemia (24%). 62% of MRSA and 44% of MSSA bacteraemia were hospital-associated ( $P <$   
 249 0.001). Overall prevalence density of SAB was 0.61 per 1,000 AOBs and HA-incidence density was  
 250 0.29 per 1,000 AOBs. Prevalence and HA-incidence were 2.1 per 1000 admissions and 3.0 per 1000  
 251 admissions, respectively. Patients with SAB were more likely to be male, older and admitted to  
 252 medical or ITU settings than the remainder inpatient population (table 1).

253

254

Table 1: Characteristics of inpatient cohorts with and without *S.aureus* bacteraemia, 2006-2010

| Characteristics                                       | Cohort              |                    |                 |                 | P-value*       |                   |
|-------------------------------------------------------|---------------------|--------------------|-----------------|-----------------|----------------|-------------------|
|                                                       | None<br>n = 419,585 | All SAB<br>n = 867 | MSSA<br>n = 659 | MRSA<br>n = 208 | MRSA<br>v MSSA | All SAB<br>v None |
| Overnight admissions                                  | 262,412 (63%)       | 864 (99%)          | 656 (99%)       | 206 (99%)       | 0.801          | <0.001            |
| Hospital associated (onset >48hrs)                    | 137,520 (33%)§      | 416 (48%)          | 287 (44%)       | 129 (62%)       | <0.001         | <0.001            |
| <b>Demographics</b>                                   |                     |                    |                 |                 |                |                   |
| Gender (female)                                       | 242,668 (58%)       | 287 (33%)          | 227 (34%)       | 60 (29%)        | 0.14           | <0.001            |
| Mean age in years (SD)                                | 56 (5)              | 58 (22)            | 55 (22)         | 65 (18)         | <0.001         | <0.001            |
| <b>Clinical background</b>                            |                     |                    |                 |                 |                |                   |
| Admitting department                                  |                     |                    |                 |                 | <0.001         | <0.001            |
| Medical                                               | 130,209 (31%)       | 600 (69%)          | 471 (72%)       | 129 (62%)       | 0.010          | <0.001            |
| Surgical                                              | 173,851 (41%)       | 173 (20%)          | 118 (18%)       | 55 (26%)        | 0.007          | <0.001            |
| ITU                                                   | 6206 (1%)           | 60 (7%)            | 37 (6%)         | 23 (11%)        | 0.007          | <0.001            |
| Paediatrics / neonatal                                | 47726 (10%)         | 27 (4%)            | 26 (4%)         | 1 (1%)          | 0.008          | <0.001            |
| Maternity                                             | 61593 (15%)         | 7 (1%)             | 7 (1%)          | 0 (0%)          | 0.136          | <0.001            |
| Previous <i>S. aureus</i> bacteraemia                 | - <sup>a</sup>      | 73 (9%)            | 49 (8%)         | 24 (12%)        | 0.068          | -                 |
| MRSA colonisation at admission (%) <sup>b</sup>       | 8134 (4.3%)         | 160 (19%)          | 72 (11%)        | 88 (43%)        | <0.001         | <0.001            |
| Admission within past 12 months                       | - <sup>a</sup>      | 522 (60%)          | 366 (56%)       | 156 (75%)       | <0.001         | -                 |
| Median (IQR) time from admission to bacteraemia, days | -                   | 2 (0 to 9)         | 1 (0 to 7)      | 7 (0 to 19)     | 0.002          | -                 |
| <b>Outcomes</b>                                       |                     |                    |                 |                 |                |                   |
| 30-day mortality                                      | -                   | 173 (20%)          | 110 (17%)       | 63 (30%)        | <0.001         | -                 |
| In hospital death                                     | 7165 (2%)‡          | 209 (25%)‡         | 134 (21%)‡      | 75 (36%)‡       | <0.001         | <0.001            |
| Median (IQR) length-of-stay, days                     | 3.8 (3.4 -3.9)      | 20 (11 to 39)      | 19 (10 to 37)   | 27 (14 to 52)   | <0.001         | <0.001            |
| Readmission (≤ 14 days)†                              | 26,534 (8%)‡        | 119 (19%)‡         | 86 (17%)‡       | 33 (25%)‡       | 0.036          | <0.001            |
| Treatment failure                                     | -                   | 42 (4.8%)          | 31 (4.7%)       | 13 (6.3%)       | 0.732          | -                 |
| Recurrence rate (100 patient yrs <sup>-1</sup> )      | -                   | 0.78               | 0.81            | 1.26            | 0.627          | -                 |

255 Data are n (%), mean (SD), or median (IQR). § Patients without bacteraemia admitted > 48hrs. \*  $\chi^2$ , Mann-Whitney U, or independent-  
 256 samples t-test. <sup>a</sup> data not available. <sup>b</sup> % eligible admissions. † In those alive at discharge, ‡ Excluding admissions to maternity and neonatal  
 257 departments (data not available, n = 65,849) and episodes of SAB with incomplete data (n=6) associated with survival at discharge.

258 There were strong associations between rate of SAB and age, days since admission and length-of-  
 259 stay (fig 2). Patients colonised with MRSA at admission were 17 times more likely to develop  
 260 hospital-associated MRSA bacteraemia (0.78 cases 1000 AOBDS<sup>-1</sup>) than those not colonised (0.05  
 261 cases 1000 AOBDS<sup>-1</sup>); crude OR (95% CI) = 17.2 (15 to 20), *P* < 0.001. Methicillin-resistant  
 262 bacteraemia occurred more frequently in ITU or surgical settings, older patients, following MRSA  
 263 colonisation and after prolonged or recent admission.

264  
 265  
 266

Clinical outcomes:

267

268 Inpatient and 30-day all-cause mortality rates after SAB were 25% and 20% respectively, and  
 269 outcomes were consistently worse than for patients without bacteraemia (table 1). Inpatient  
 270 mortality was over six-times higher than expected in the SAB cohort (SMR, 95% CI 6.4, 5.7 to 7.0).  
 271 Attributable inpatient mortality was 20% (31% for MRSA and 17% for MSSA bacteraemia).

272

273 Methicillin resistance was associated with longer length-of-stay and increased readmission rates.  
 274 The crude odds ratio for mortality within 30 days of isolation of MRSA versus MSSA was 2.15 (95% CI  
 275 1.50 to 3.08; *p* < 0.001). A final multivariate logistic regression model confirmed age, month of study  
 276 (secular trend) and hospital-associated infection as independent risk-factors for 30-day mortality,  
 277 however after adjustment for these covariates methicillin resistance was not a significant  
 278 determinant (OR, 95% CI: 1.38 (0.93-2.06); *p* = 0.112) – table 2.

279  
 280  
 281

**Table 2: Multivariate logistic and Cox regression models of risk factors for 30-day mortality, inpatient mortality and discharge alive**

|                                         | 30 day mortality <sup>a</sup> |         | Inpatient mortality <sup>b</sup> |         | Discharge alive <sup>c</sup> |         |
|-----------------------------------------|-------------------------------|---------|----------------------------------|---------|------------------------------|---------|
|                                         | OR (95% CI)                   | P value | HR (95% CI)                      | P value | HR (95% CI)                  | P value |
| MRSA                                    | 1.38 (0.93 to 2.06)           | 0.112   | 1.47 (1.09 – 1.98)               | 0.012   | 1.09 (0.89 - 1.33)           | 0.416   |
| Gender (female)                         | 1.41 (0.96 to 2.04)           | 0.075   | 1.18 (0.89-1.58)                 | 0.244   | 1.06 (0.89-1.25)             | 0.536   |
| Age (10 yrs <sup>-1</sup> )             | 1.79 (1.58 to 1.97)           | <0.001  | 1.42 (1.29 - 1.57)               | <0.001  | 0.86 (0.83-0.90)             | <0.001  |
| Hospital associated SAB                 | 1.56 (1.08 to 2.26)           | 0.018   | 0.44 (0.33-0.60)                 | <0.001  | 1.50 (1.26-1.80)             | <0.001  |
| Secular trend per 3 months              | 0.87 (0.77 to 0.99)           | 0.028   | 0.92 (0.83-1.02)                 | 0.094   | -                            | -       |
| Length of stay (7 days <sup>-1</sup> )* | -                             | -       | 1.02 (1.01 to 1.03)              | <0.001  | 0.98 (0.97-0.98)             | <0.001  |
| ITU admission                           | -                             | -       | -                                | -       | 0.70 (0.59-1.00)             | 0.052   |

OR = odds ratio, HR = Hazards Ratio, CI = confidence interval.

a Logistic regression for 30-day mortality. This model had good calibration (Hosmer-Lemeshow goodness of fit *p* = 0.93) and discrimination (area under receiver operator characteristic curve = 0.77).

b Cox (proportional hazards) regression. Model  $\chi^2$  (df) = 115 (6); *P* < 0.001

c Cox (proportional hazards) regression. Model  $\chi^2$  (df) = 265 (6); *P* < 0.001

\* Entered as a time-dependent covariate.

282  
 283  
 284  
 285  
 286  
 287  
 288 In a multivariate Cox-regression model, methicillin resistance was associated with increased hazard  
 289 of inpatient death (adjusted HR = 1.47, 95% CI 1.1 to 2.0; *P*=0.012) – table 2, but there was no  
 290 significant difference in discharge rate in survivors. Age, duration of hospitalisation and hospital-  
 291 associated infection were independent predictors of hazard of inpatient death.

292 **Secular trends:**

293

294 Trends in *S.aureus* bacteraemia and clinical outcomes:

295

296 Prevalence density of all SAB declined from 0.73 1000 AOBDS<sup>-1</sup> to 0.50 1000 AOBDS<sup>-1</sup> between  
 297 January 2006 and December 2010, (-0.07 year<sup>-1</sup>, 95% CI -0.11 to -0.02); a decrease of 41% ( $P=0.002$   
 298 for trend). Prevalence density of MRSA bacteraemia fell 73% from 0.26 to 0.07 1000 AOBDS<sup>-1</sup> ( $P <$   
 299 0.001) and HA-incidence density 82%, from 0.16 to 0.03 1000 AOBDS<sup>-1</sup> ( $P <0.001$ ), however rates of  
 300 MSSA bacteraemia were unchanged (Fig 3). An increasing proportion of MRSA bacteraemia was  
 301 associated with previous colonisation or infection (table 3). Case-mix within the SAB cohort was  
 302 otherwise stable.

303

304 Over the five year period, 30-day mortality declined from 26% to 14% (-46%;  $P=0.013$  for trend) and  
 305 inpatient mortality from 29% to 18% (-38%;  $P = 0.045$ ). 30-day mortality after MRSA bacteraemia  
 306 declined from 37% to 13% ( $P = 0.027$ ) but no significant change was observed in mortality after  
 307 MSSA bacteraemia (fig 3). By 2010, 90% of episodes of bacteraemia and 86% of associated inpatient  
 308 deaths were attributable to MSSA.

309

310

311

**Table 3: *S. aureus* bacteraemia by methicillin sensitivity, demographic and clinical characteristics and outcomes by year of study: N (%), Mean (SD) or median (IQR).**

|                                               | Year            |                 |               |                 |                 | p value* |
|-----------------------------------------------|-----------------|-----------------|---------------|-----------------|-----------------|----------|
|                                               | 2006<br>n = 218 | 2007<br>n = 188 | 2008<br>n=151 | 2009<br>n = 152 | 2010<br>n = 158 |          |
| <b>Frequencies</b>                            |                 |                 |               |                 |                 |          |
| % of bacteraemia involving:                   |                 |                 |               |                 |                 | <0.001   |
| MSSA (%)                                      | 156 (72%)       | 140 (74%)       | 100 (66%)     | 121 (80%)       | 142 (90%)       |          |
| MRSA (%)                                      | 62 (28%)        | 48 (26%)        | 51 (34%)      | 31 (20%)        | 16 (10%)        |          |
| <b>Demographics</b>                           |                 |                 |               |                 |                 |          |
| Gender (female)                               | 66 (30%)        | 62 (33%)        | 55 (36%)      | 55 (36%)        | 49 (30%)        | 0.603    |
| Age (years)                                   | 57 (22)         | 56 (21)         | 58 (22)       | 56 (22)         | 57 (20)         | 0.744    |
| <b>Clinical characteristics</b>               |                 |                 |               |                 |                 |          |
| Admitting department ITU (%)                  | 17 (8%)         | 11 (6%)         | 12 (9%)       | 12 (8%)         | 8 (5%)          | 0.501    |
| Hospital Associated (%)                       | 112 (51%)       | 108 (60%)       | 69 (46%)      | 75 (50%)        | 92 (58%)        | 0.750    |
| Previous <i>S.aureus</i> bacteraemia, any (%) | 10 (5%)         | 18 (10%)        | 19 (13%)      | 14 (10%)        | 12 (8%)         | 0.787    |
| Previous MRSA colonisation or infection (%)†  | 24 (39%)        | 24 (50%)        | 29 (57%)      | 16 (52%)        | 10 (63%)        | 0.056    |
| Admission within past 12 months (%)           | 134 (62%)       | 101 (54%)       | 92 (61%)      | 96 (63%)        | 99 (62%)        | 0.503    |
| <b>Outcomes</b>                               |                 |                 |               |                 |                 |          |
| 30-day mortality                              | 52 (24%)        | 39 (22%)        | 31 (21%)      | 27 (18%)        | 24 (15%)        | 0.013    |
| In hospital death                             | 63 (29%)        | 45 (25%)        | 34 (23%)      | 34 (23%)        | 33 (21%)        | 0.045    |
| Length-of-stay (days)                         | 19 (10-41)      | 17 (7-36)       | 27 (12-36)    | 22 (12-44)      | 19 (12-42)      | 0.508    |
| Readmission (≤ 14 days)                       | 25 (17%)        | 19 (14%)        | 25 (22%)      | 31 (27%)        | 19 (16%)        | 0.291    |

\* Linear and logistic regressions with month of study as sole explanatory variable. † Data presented for MRSA bacteraemia only.  
 CI = Confidence Intervals, MRSA = methicillin-resistant *Staphylococcus aureus*, AOBDS = acute occupied bed days

312

1  
2  
3 313 Trends in inpatient case mix:  
4  
5 314

6 315 There were no significant trends in admitting speciality, or gender among inpatients over the five  
7  
8 316 year period. Mean age of adult and all patients increased between 2006 and 2010 (+1.7, 95% CI: +1.3  
9  
10 317 to +2.2 years, for all patients;  $P < 0.001$ ), while mean length-of-stay (-1.3, -1.6 to -1.11 days;  $P <$   
11  
12 318 0.001) and weighted average bed occupancy (-2.6%, -4.8% to -0.4%;  $P = 0.021$ ) declined  
13  
14 319 (supplemental file 2). Consideration the associations noted earlier, these changes represented  
15  
16 320 opposing upward (increasing age), and downward (reduced length-of-stay, bed occupancy)  
17  
18 321 pressures on rates of bacteraemia. Secular trend in MRSA prevalence density ( $P = 0.03$  for trend) and  
19  
20 322 HA-incidence density ( $P = 0.01$ ) remained significant after adjusting for these changes in case-mix in  
21  
22 323 a multivariate Poisson regression model.

23 324

### 24 325 **Impacts of universal MRSA admission screening**

25 326

26 327

27 328 Screening adherence and importation pressures:

28 329

29 330 43% of all adult, non-obstetric overnight admissions and 84% of eligible patients in high-risk  
30  
31 331 environments were screened prior to routine surveillance. During universal surveillance 87% of  
32  
33 332 eligible patients were screened ( $n = 86,890$ ). A target of 90% adherence was achieved within four  
34  
35 333 months of initiation and sustained thereafter, excluding a special study period in which trial of  
36  
37 334 additional throat, perineum and axillae swabs and discharge screening reduced patient participation  
38  
39 335 (fig 4). MRSA prevalence at admission (importation pressure) steadily declined during the period of  
40  
41 336 universal surveillance, averaging 3.1%, with 1.7% known to be previously colonised or infected with  
42  
43 337 MRSA. There was an increase in episodes of MRSA bacteraemia preceded by screening at admission  
44  
45 338 (95% vs. 81%;  $P = 0.008$ ) and identified as being colonised at admission (56% vs. 38% of all  
46  
47 339 admissions;  $P = 0.013$ ) after introduction of universal surveillance.

48 340

49 341 Patient characteristics by study period:

50 342

51 343 Case-mix remained stable between periods of selective screening and universal admission screening  
52  
53 344 – table 4. However, there were significant reductions in bed occupancy, length-of-stay and use of  
54  
55 345 “4C” antibiotics ( $P < 0.03$  for all comparisons). Alcohol-gel was introduced in 2002 with no significant  
56  
57 346 change in usage noted after introduction of screening, although baseline data were limited. A  
58  
59 347 significant decline in “4C” usage was only observed after 10 months of universal screening, with a  
60  
348 reduction from 38% to 20% within 4 months.

349 **Table 4: Characteristics pre and post-intervention**

| Characteristics                                                | Selective screening only | Universal admission screening |
|----------------------------------------------------------------|--------------------------|-------------------------------|
| <b>Admission data</b>                                          |                          |                               |
| No. of all admissions                                          | 210,745                  | 209,707                       |
| No. of Acute Occupied bed days (at risk)                       | 748,569                  | 681,483                       |
| <b>Case-mix</b>                                                |                          |                               |
| Mean (SD) age all patients, years                              | 45.9 (0.45)              | 47.3 (0.57)                   |
| Mean (SD) age, ITU, medical and surgical adult services, years | 55.3 (0.41)              | 56.4 (0.56)                   |
| Gender: n (%) of all admissions                                |                          |                               |
| Female,                                                        | 122,538 (58%)            | 120,417 (57%)                 |
| Male                                                           | 88,207 (42%)             | 89,290 (43%)                  |
| Speciality, n (%) of all admissions                            |                          |                               |
| Surgical                                                       | 84,216 (40%)             | 89,808 (43%)                  |
| Medical                                                        | 65,711 (31%)             | 65,098 (31%)                  |
| ITU                                                            | 3312 (2%)                | 2954 (1%)                     |
| Maternity                                                      | 31,862 (15%)             | 29,738 (14%)                  |
| Paediatric / neonatal                                          | 24606 (12%)              | 23,147 (12%)                  |
| <b>Other aspects of care</b>                                   |                          |                               |
| Mean (SD) length of stay in hospital, days                     | 3.96 (0.23)              | 3.33 (0.51)                   |
| Bed-occupancy (% all available beds occupied)                  | 79%                      | 77%                           |
| "4C" Antibiotic usage (% of all antibiotic DDDs / 1000 AOBDS)* | 41%*                     | 29%                           |
| Hand-hygiene (Dispensed alcohol gel in Litres / 1000 AOBDS)†   | 38.1†                    | 37.2                          |
| <b>MRSA Screening, colonisation and infections</b>             |                          |                               |
| Number (%) of overnight admissions‡ screened for MRSA          | 43,158 (43%)             | 86,890 (87%)                  |
| Number (%) of overnight admissions‡ screen positive for MRSA   | 2909 (3.5%)              | 2694 (3.1%)                   |
| Number (‰) of admissions with any MRSA infection               | 1891 (9 ‰)               | 798 (4‰)                      |
| <b>Clinical burdens from <i>S.aureus</i> bacteraemia</b>       |                          |                               |
| Prevalent MSSA bacteraemia (n)                                 | 353                      | 306                           |
| Prevalent MRSA bacteraemia (n)                                 | 144                      | 64                            |
| Hospital-associated incident MRSA bacteraemia (n)              | 89                       | 29                            |
| Deaths within 30 days MSSA(n)                                  | 62                       | 48                            |
| Deaths within 30 days MRSA(n)                                  | 51                       | 12                            |

350 DDDs = Daily Defined Doses; AOBDS = Acute Occupied Bed Days; ARI = Aberdeen Royal Infirmary; "4Cs" are Ciprofloxacin, Cephalosporins,  
 351 Clindamycin, Co-amoxiclav.\*Data available from April 2007 only (44 months) .‡ Adult, non-obstetric patients only.† Data available from  
 352 Apr 2008 only (35 months).  
 353  
 354  
 355

356 Time series intervention analysis:

357  
 358 In multivariate transfer function models, adjusting for changes in other aspects of care and prior  
 359 trends (table 5 and fig 5), universal screening was associated with a 28% reduction in prevalence  
 360 density (absolute change, 0.189 to 0.136 (-0.053) cases 1000 AOBDS<sup>-1</sup>; P <0.001), a 62% reduction in  
 361 hospital-associated incidence density (0.100 to 0.048 (-0.062) cases 1000 AOBDS<sup>-1</sup>; P = 0.014) and a  
 362 56% fall in 30-day mortality (34% to 15.2% (-18.8%); P =0.021). Final models explained 19-48% of  
 363 variance but in all models residuals corresponded to white-noise. Using targeted screening as the  
 364 comparison, during universal screening the number needed to screen (NNS) to avoid one episode of  
 365 MRSA bacteraemia was 1863.

366  
 367 No significant associations were found between universal screening and rates of MSSA bacteraemia  
 368 and %SAB involving MRSA fell by 38% (from 28.6% to 17.6% (-11.0%); P = 0.014).

369  
 370  
 371

372  
373  
374**Table 5: Multivariate transfer function models<sup>†</sup> for MRSA bacteraemia taking into account introduction of universal admission screening and changes in other aspects of care (January 2006 to December 2010)**

| Term                                                                                                  | Order <sup>a</sup> | Parameter <sup>b</sup> (SE) | T-ratio | P-value |
|-------------------------------------------------------------------------------------------------------|--------------------|-----------------------------|---------|---------|
| <b>(a) Prevalence density of MRSA bacteraemia (cases per 1000 AOBDS) , R2 = 0.48</b>                  |                    |                             |         |         |
| AR <sup>c</sup>                                                                                       | 6                  | -0.315 (0.116)              | -2.71   | 0.007   |
| Length-of-stay <sup>e</sup>                                                                           | 1                  | 0.044 (0.003)               | 16.55   | <0.001  |
| Universal MRSA screening intervention                                                                 | 0                  | -0.053 (0.014)              | -3.83   | <0.001  |
| <b>(b) Hospital-associated incidence density of MRSA bacteraemia (cases per 1000 AOBDS) R2 = 0.35</b> |                    |                             |         |         |
| Constant                                                                                              | 0                  | 0.100 (0.019)               | 5.43    | <0.001  |
| AR <sup>c</sup>                                                                                       | 1                  | 0.476 (0.115)               | 4.13    | <0.001  |
| Universal MRSA screening intervention                                                                 | 0                  | -0.062 (0.025)              | -2.46   | 0.014   |
| <b>(c) % SABs involving MRSA (%), , R2= 0.35</b>                                                      |                    |                             |         |         |
| AR <sup>c</sup>                                                                                       | 1                  | 0.293 (0.129)               | 2.27    | 0.023   |
| MA <sup>d</sup>                                                                                       | 9                  | -0.457 (0.132)              | -3.47   | <0.001  |
| Bed-occupancy (%) <sup>f</sup>                                                                        | 4                  | 0.36 (0.046)                | 7.89    | <0.001  |
| Universal MRSA screening intervention                                                                 | 0                  | -11.0 (4.53)                | -2.44   | 0.014   |
| <b>(d) 30-day mortality (%) after MRSA bacteraemia, R2 = 0.19</b>                                     |                    |                             |         |         |
| AR <sup>c</sup>                                                                                       | 6                  | 0.349 (0.150)               | 2.33    | 0.02    |
| Bed-occupancy (%) <sup>f</sup>                                                                        | 2                  | 0.454 (0.090)               | 5.05    | <0.001  |
| Universal MRSA screening intervention                                                                 | 0                  | -18.8 (8.16)                | -2.3    | 0.021   |

<sup>†</sup>All series stationary before model identification. Residuals in all models corresponded to white-noise.<sup>a</sup>Delay necessary to observe the effect (in months).<sup>b</sup>Size and direction of effect.<sup>c</sup>AR, autoregressive term representing past values of bacteraemia rates or mortality.<sup>d</sup>MA, moving average term representing abrupt changes in bacteraemia rates or mortality in immediate future.<sup>e</sup>Length-of-stay, average inpatient length-of-stay by month,<sup>f</sup>% Bed occupancy, average bed-occupancy weighted by admitting department, by month.375  
376  
377  
378  
379  
380  
381  
382  
383  
384  
385  
386  
387  
388  
389  
390  
391  
392  
393  
394  
395  
396  
397  
398  
399  
400  
401



1  
2  
3 402 **Discussion**  
4 403  
5 404  
6

7 405 This retrospective cohort study identified a 41% decrease in prevalence density of all *S.aureus*  
8 406 bacteraemia in an inpatient population from Scotland between 2006 and 2010. Secular trends were  
9 407 attributable to steep reductions in MRSA bacteraemia.  
10  
11

12 408

13 409 Introduction of a universal MRSA admission screening programme was associated with significant  
14 410 reductions in rates of MRSA bacteraemia and associated early mortality, whilst having no  
15 411 discernable impact on burdens from MSSA bacteraemia.  
16  
17

18 412

19  
20 413 **Strengths and limitations**

21 414 Analyses of risk-factors for SAB acquisition and outcomes were limited by a lack of information on  
22 415 comorbidities, severity of sepsis, source control and clinical management.[4,13,37] However, age has  
23 416 been shown to be an appropriate proxy for co-morbidity and risk of death,[13] and our estimates of  
24 417 attributable mortality approximate those in more detailed analyses.[4]  
25  
26

27 418

28  
29 419 Changes in strain distribution have been linked to secular trends in invasive *S.aureus*  
30 420 infections,[6,21] although declines in epidemic strains predated decreases in MRSA in the UK.[10]  
31 421 Reflecting national data,[10] regional studies of MRSA infections from the same period identified  
32 422 significant increase in EMRSA-15, with a reciprocal decline in EMRSA-16.[38,39] Trends in strain may  
33 423 have confounded, or mediated, the associations between infection control measures and SAB  
34 424 epidemiology. [10]  
35  
36

37 425

38  
39 426 Universal MRSA admission screening was introduced as part of an NHS Scotland pathfinder project,  
40 427 precluding the use of cross-over, or controlled, trial designs as elsewhere.[40,41] Data on isolation-  
41 428 days captured – suggested as a measure of surveillance effectiveness,[42] were also not available.  
42  
43

44 429 We attempted to minimise threats to internal validity common to quasi-experimental studies of  
45 430 infection control measures.[22,34] A definition of bacteraemia based on blood isolates rather than  
46 431 clinical suspicion made the study less vulnerable to detection bias whilst follow-up to a minimum of  
47 432 two weeks post-discharge prevented attrition bias arising for changes in length of stay. An attempt  
48 433 to identify and prevent selection and performance bias was made by identifying and controlling for,  
49 434 changes in case-mix, importation pressure,[40] and other aspects of care,[22] before and after the  
50 435 intervention. Investigation of concurrent trends in MSSA bacteraemia provided some control for  
51 436 impacts of general improvements in infection control or clinical management, and supports an  
52  
53  
54  
55  
56  
57  
58  
59  
60

1  
2  
3 437 independent effect of screening on MRSA bacteraemia.[34] ARIMA techniques, account for non-  
4 438 independence of parameters and stochastic elements in time-series. This is convergent with  
5 439 understanding of the spread of resistance and infectious disease within populations,[32,34] and  
6 440 minimises the potential for regression to the mean to account for trends.  
7  
8

9 441

10 442 Transfer function models including screening, length-of-stay and bed-occupancy accounted for 35-  
11 443 48% of variation in rates of bacteraemia, suggesting unmeasured factors affecting rates. Universal  
12 444 screening was one of several sequentially implemented control measures for MRSA in North East  
13 445 Scotland, including introduction of environmental swabbing and disinfection (2001), alcohol hand gel  
14 446 (2002) and targeted admission screening (2003) [31] Antibiotic use in hospital has been linked to  
15 447 rates of all MRSA infections in the region.[31,33,43] Decline in the use of "4C" antibiotics occurred  
16 448 during implementation of screening. However, this antibiotic stewardship policy started 9 months  
17 449 after universal screening and with typical lags of 4-8 months between changes in antibiotic usage  
18 450 and rates of MRSA infections,[32] any impacts would have occurred late in the study period.  
19 451 Introduction of screening was likely to be associated with improved awareness amongst healthcare  
20 452 workers and the public around MRSA, with potential improvements in adherence to general  
21 453 infection control policy such as hand hygiene. Performance in infection control may also have been  
22 454 influenced by internal audit of MRSA screening. However, non-declining trends in MSSA suggested  
23 455 general infection control measures were an inadequate explanation for MRSA-specific declines.  
24  
25

26 456

27 457 Rates of MRSA colonisation, infection and bacteraemia, and effect sizes from intervention in the  
28 458 present study are comparable to those described in previous investigations of universal  
29 459 surveillance.[26,41] Findings may be generalisable to other large public hospitals with intensive  
30 460 care units in high-income countries, with endemic MRSA and relatively low rates of MRSA infection.  
31  
32

33 461

#### 34 462 **Comparison to literature:**

35 463 We identified a number of risk-factors for developing *S.aureus* bacteraemia and associated early  
36 464 mortality consistent with previous findings, including; older age,[3,4,13] recent or prolonged  
37 465 hospitalisation,[3,37,44] prior history of colonisation or infection,[45] colonisation on  
38 466 admission,[45,46] and ITU admission.[9] Associations were significantly stronger for MRSA  
39 467 bacteraemia.[46] Despite two meta-analyses suggesting an excess mortality in MRSA, compared to  
40 468 MSSA bacteraemia,[15,17] there remains considerable debate about the importance of methicillin  
41 469 resistance to outcomes.[4,13,18] Our findings suggest that much of the increase in mortality  
42  
43  
44  
45  
46  
47  
48  
49  
50  
51  
52  
53  
54  
55  
56  
57  
58  
59  
60

1  
2  
3 470 associated with methicillin resistance may be explained by infection of more vulnerable patients,[13-  
4 471 18,37] often in the context of extended contact with healthcare.[15,37]

5  
6 472

7  
8 473 Reflecting the findings of an earlier study from Oxfordshire, which found that MRSA-related disease  
9 474 was responsible for increasing rates of SAB between 1997 and 2003,[3] our findings suggest that  
10 475 subsequent declines have occurred, almost exclusively in MRSA-related disease. An equivalent  
11 476 upward pressure on MSSA rates has not been observed, consistent with observations that MRSA  
12 477 appears to add to, rather than displace MSSA infection.[21] These findings match experience across  
13 478 the UK.[8]

14  
15  
16 479

17  
18  
19 480 Evidence on the role of universal screening in reducing all MRSA infections, is  
20 481 conflicting.[28,30,41,42,47-50] and benefits may depend on target population, screening technology  
21 482 and subsequent control interventions.[47] A recent US study of routine surveillance for MRSA noted  
22 483 a significant downward trend in MRSA bacteraemia in ICU but not in other hospital settings.[30] A  
23 484 second US study found a decrease in hospital-wide MRSA, but not MSSA bacteraemia during  
24 485 universal screening.[42] Hospital-wide reductions in bacteraemia, of similar magnitude to that seen  
25 486 in our study, were reported following introduction of screening in intensive care[29] or high-risk  
26 487 patients only.[28] In agreement with these studies, we found that rates of MRSA bacteraemia  
27 488 declined in parallel with all MRSA infections,[51] and there was no reciprocal rise in hospital-wide  
28 489 MSSA bacteraemia or infections.[48]

29  
30  
31 490

32 491 Our findings suggest additional considerations in assessing utility of universal surveillance. Patients  
33 492 colonised at admission were at high risk of developing hospital-associated MRSA bacteraemia and  
34 493 early identification of colonised patients provides opportunities to reduce invasive infection by  
35 494 decolonisation.[27] As elsewhere,[29] declines in hospital-associated infection were steeper than  
36 495 those in rates including community-associated infection, coherent with reductions in transmission.  
37 496 Similarly, decline in importation pressure during universal surveillance suggested interruption of  
38 497 connections between prevalence of MRSA in hospital and community populations, focused in  
39 498 frequently admitted patients.[43,52,53] However, approximately 50% of hospital-associated MRSA  
40 499 bacteraemia occurred in patients not colonised at admission highlighting the limitations in admission  
41 500 surveillance and the persistence of cross-transmission.[54]

42  
43  
44 501

45  
46 502

47  
48  
49 503

50  
51  
52  
53  
54  
55  
56  
57  
58  
59  
60

1  
2  
3 **504 Implications for practice, policy and research**

4 505 Our study suggests that universal admission screening for MRSA may have an important effect on  
5 506 rates of MRSA bacteraemia, and associated mortality, beyond selective screening of high-risk  
6 507 patients. However, there remains debate around the cost-effectiveness of universal surveillance in  
7 508 comparison to alternative control measures,[49,55-58] risks of chlorhexidine resistance with  
8 509 widespread decolonisation,[11] and opportunity costs or unintended harms associated with  
9 510 isolation.[59] Subsequent to the pathfinder study, NHS Scotland has suggested hospital-wide  
10 511 targeted surveillance based on clinical risk-assessment as a minimum standard.[60] This is  
11 512 convergent with an emerging consensus that admission screening based on clinical prediction rules  
12 513 may offer a more efficient and pragmatic approach outside of populations with high-prevalence of  
13 514 MRSA.[47,58,61] Irrespective of the chosen strategy, experience suggests benefits of admission  
14 515 screening will only be realised where integrated with a broader package of infection prevention and  
15 516 control measures.[28,47,54]

16 517  
17 518 The concentration of both MRSA and MSSA blood stream infections in susceptible patient groups  
18 519 with higher levels of healthcare contact suggests some measures successfully limiting invasive MRSA  
19 520 infections may be generalizable to control of all SAB. A more rigorous approach to identify and limit  
20 521 iatrogenic sources of bacteraemia, including peripheral or central catheters,[37,40,62] is required.  
21 522 Screening for MSSA with isolation and decolonisation has been suggested for selected, high-risk  
22 523 patients.[63]

23 524  
24 525 Equally, strategies are required that account for the distinct epidemiology of MSSA and MRSA  
25 526 bacteraemia. In contrast to MRSA, the majority of MSSA bacteraemia in this study were community  
26 527 associated and occurred in younger patients. Targeted measures are required to prevent invasive  
27 528 infection in at-risk groups including IV drug users,[37,64] surgical, diabetic and renal patients.[63,65]  
28 529 Given the role of social and risk-networks in sustaining *S.aureus* transmission,[64] broadening  
29 530 control of SAB to the community is likely to require the commitment of multiple agencies and  
30 531 healthcare providers.

31 532  
32 533 Changes in virulence of MSSA and MRSA may account for divergence in trends in outcomes.[13]  
33 534 Genetic sequencing or typing could be used to quantify the contribution of clonal expansions to  
34 535 recent trends in SAB epidemiology. A recent multicentre study found large variation in management  
35 536 of SAB in the UK and called for high-level evidence to define optimal care.[37] Future research and  
36 537 guidelines should consider both MSSA and MRSA bacteraemia.

1  
2  
3 538  
4 539  
5 540  
6 541  
7 542  
8 543  
9 544  
10 545  
11 546  
12 547  
13 548  
14 549  
15 550  
16 551  
17 552  
18 553  
19 554  
20 555  
21 556  
22 557  
23 558  
24 559  
25 560  
26 561  
27 562  
28 563  
29 564  
30 565  
31 566  
32 567  
33 568  
34 569  
35 570  
36 571  
37 572  
38  
39  
40  
41  
42  
43  
44  
45  
46  
47  
48  
49  
50  
51  
52  
53  
54  
55  
56  
57  
58  
59  
60

In summary, this study described decreasing trends in *S. aureus* bacteraemia following a decade of infection control policies focusing on MRSA. Expansion from targeted to universal MRSA admission screening was associated with important reductions in MRSA bacteraemia, when combined with isolation and selective decolonisation. However, findings also highlighted the need for strategies to reduce clinical burdens from invasive MSSA infection if progress towards national targets for SAB is to be sustained.[21,44]

For peer review only

1  
2  
3 573 **Acknowledgements:** The authors would like to thank all the staff in the routine microbiology  
4 574 diagnostic lab and all the clinical staff at Aberdeen Royal Infirmary, whose work made this possible.  
5  
6 575 We are grateful to Richard Slessor and the health intelligence services, Aberdeen for providing data  
7  
8 576 on admissions. We would also like to thank Health Protection Scotland for help in the  
9  
10 577 implementation of the pathfinder project.  
11

578

12 579 **Contributors:** BE and IMG conceived this study. The statistical analysis was performed by TL and  
13  
14 580 JMLL. All authors assisted in drafting the manuscript. Ian M Gould is the guarantor for this study.  
15

581

16  
17 582 **Funding:** The NHS pathfinder study on universal admission screening was funded by the Scottish  
18  
19 583 Government Health Directorate. This research received no specific grant from any funding agency in  
20  
21 584 the public, commercial or not-for-profit sectors  
22

585

23  
24 586 **Competing Interests:** All authors have completed the Unified Competing Interest form at  
25  
26 587 [www.icmje.org/coi\\_disclosure.pdf](http://www.icmje.org/coi_disclosure.pdf) (available on request from the corresponding author) and declare  
27  
28 588 no support from any organisation for the submitted work. IM Gould has received personal and grant  
29  
30 589 financial support from companies manufacturing diagnostics and therapeutics for MRSA. B Edwards  
31  
32 590 has received grant financial support from Novartis. T Lawes and JM López-Lozano have no conflicts  
33  
34 591 to declare. TL BE JMLL IMG know of no other relationships or activities that could appear to have  
35  
36 592 influenced the submitted work.  
37

593

38 594 **Ethical approval:** Ethics approval was not required.

39 595 Authors' note: This study used anonymised and routinely collected data from laboratory systems,  
40  
41 596 infection control, pharmacy, and health intelligence departments. Patient-orientated information on  
42  
43 597 MRSA screening, and NHS Grampian's participation in a national pathfinder project, was made  
44  
45 598 widely available in Aberdeen Royal Infirmary. This information included a statement that patient  
46  
47 599 information would be held in the strictest confidence and used only for stated purposes of informing  
48  
49 600 the NHS about the value of a national screening programme, in accordance with the Data Protection  
50  
51 601 Act 1998. The authors hold that extraction of data for the purposes of this study did not impose any  
52  
53 602 predictable additional burdens on patients at ARI and its use was justified by foreseeable benefits to  
54  
55 603 the patient populations in the NHS and the general public. The authors believe that the present  
56  
57 604 study was conducted in accordance with the Declaration of Helsinki 1964.  
58

605

59 606 **Data sharing:** Technical appendix available on request from the corresponding author.  
60

607

608 **References:**

- 609  
610 1. Allegranzi B, Bagheri Nejad S, et al. Burden of endemic health-care-associated infection in developing  
611 countries: systematic review and meta-analysis. *Lancet* 2011;377(9761):228-41.  
612  
613  
614 2. Wilson J, Elgohari S, Livermore DM, et al. Trends among pathogens reported as causing bacteraemia in  
615 England, 2004-2008. *Clin Microbiol Infect* 2011;17(3):451-8.  
616  
617  
618 3. Wyllie DH, Crook DW, Peto TEA. Mortality after *Staphylococcus aureus* bacteraemia in two hospitals in  
619 Oxfordshire, 1997-2003: cohort study. *BMJ* 2006; 333: 281-6.  
620  
621  
622 4. Blot SI, Vandewoude KH, Hoste EA, et al. Outcome and attributable mortality in critically ill patients with  
623 bacteraemia involving methicillin-susceptible and methicillin-resistant *Staphylococcus aureus*. *Arch Intern Med*  
624 2002;162(19):2229-35.  
625  
626  
627 5. de Kraker MEA, Davey PG, Grundmann H; on behalf of the BURDEN study group. Mortality and Hospital Stay  
628 Associated with Resistant *Staphylococcus aureus* and *Escherichia coli* Bacteremia: Estimating the Burden of  
629 Antibiotic Resistance in Europe. *PLoS Med*, 2011; 8(10): e1001104.  
630  
631  
632 6. Johnson AP, Pearson A, Duckworth G. Surveillance and epidemiology of MRSA bacteraemia in the UK. *J*  
633 *Antimicrob Chemother*. 2005;56(3):455-62.  
634  
635  
636 7. Clements A, Halton K, Graves N, et al. Overcrowding and understaffing in modern health-care systems: key  
637 determinants in methicillin-resistant *Staphylococcus aureus* transmission. *Lancet Infect Dis* 2008;8(7):427-34.  
638  
639  
640 8. Pearson A, Chronias A, Murray M: Voluntary and mandatory surveillance for methicillin-resistant  
641 *Staphylococcus aureus* (MRSA) and methicillin-susceptible *S. aureus* (MSSA) bacteraemia in England. *J*  
642 *Antimicrob Chemother*. 2009; 64 Suppl 1:i11-7.  
643  
644  
645 9. Edgeworth JD. Has decolonization played a central role in the decline in UK methicillin-resistant  
646 *Staphylococcus aureus* transmission? A focus on evidence from intensive care. *J Antimicrob Chemother*.  
647 2011;66 Suppl 2:ii41-7.  
648  
649  
650 10. Wyllie D, Paul J, Crook D. Waves of trouble: MRSA strain dynamics and assessment of the impact of  
651 infection control. *J Antimicrob Chemother* 2011;66(12):2685-8  
652  
653  
654 11. Health Protection Agency. Voluntary reporting of *Staphylococcus aureus* bacteraemia in England, Wales  
655 and Northern Ireland, 2010. London: Health Protection Agency; 2011.  
656  
657  
658 12. Health Protection Scotland. SNBTS Annual Infection Control Report: April 2010 to March 2011. Edinburgh:  
659 Health Protection Scotland; 2011.  
660  
661

- 1  
2  
3 662 13. Shurland S, Zhan M, Bradham DD, et al. Comparison of Mortality Risk Associated With Bacteremia Due to  
4 663 Methicillin-Resistant and Methicillin-Susceptible *Staphylococcus aureus*. *Infection Control and Hospital*  
5 664 *Epidemiology* 2007; 28 (3): 273-9.  
6 665  
7 666  
8 667 14. Wang JL, Chen SY, Wang JT, et al. Comparison of both clinical features and mortality risk associated with  
9 668 bacteremia due to community-acquired methicillin-resistant *Staphylococcus aureus* and methicillin-susceptible  
10 669 *S. aureus*. *Clin Infect Dis* 2008;46(6):799-806.  
11 670  
12 671  
13 672 15. Whitby M, McLaws M-L, Berry G. Risk of death from methicillin-resistant *Staphylococcus aureus*  
14 673 bacteraemia: a meta-analysis. *Med J Aust* 2001;175:264-7.  
15 674  
16 675  
17 676 16. Wolkewitz M, Frank U, Philips G, et al: Mortality associated with in-hospital bacteraemia caused by  
18 677 *Staphylococcus aureus*: a multistate analysis with follow-up beyond hospital discharge; *J antimicrob*  
19 678 *chemother*, 2011; 66: 381-386.  
20 679  
21 680  
22 681 17. Cosgrove SE, Sakoulas G, Perencevich EN, et al. Comparison of mortality associated with methicillin-  
23 682 resistant and methicillin-susceptible *Staphylococcus aureus* bacteraemia: a meta-analysis. *Clin Infect Dis* 2003;  
24 683 36: 53-9.  
25 684  
26 685  
27 686 18. Cosgrove SE, Qi Y, Kaye KS, et al. The Impact of Methicillin Resistance in *Staphylococcus aureus*  
28 687 Bacteraemia on Patient Outcomes: Mortality, Length of Stay, and Hospital Charges. *Infection Control and*  
29 688 *Hospital Epidemiology*; 26(2): 166-174.  
30 689  
31 690  
32 691 19. NHS Scotland. HEAT Targets due for delivery in 2009/10: Summary of performance. Edinburgh: NHS  
33 692 Scotland Performance and Business Management;2011.  
34 693  
35 694  
36 695 20. Paul J. Surveillance and management of all types of *Staphylococcus aureus* bacteraemia [editorial]. *BMJ*  
37 696 2006; 333: 269.  
38 697  
39 698  
40 699 21. Mostofsky E, Lipsitch M and Regev-Yochay G. Is methicillin-resistant *Staphylococcus aureus* replacing  
41 700 methicillin-susceptible *S.aureus*? *J Antimicrob Chemother* 2011; 66: 2199-2214.  
42 701  
43 702  
44 703 22. Cooper BS, Stone SP, Kibbler CC, et al. Systematic review of isolation measures in the hospital management  
45 704 of methicillin resistant *Staphylococcus aureus*: a review of the literature with epidemiological and economic  
46 705 modelling. *Health Technol Assess*. 2003;7(39):191-4  
47 706  
48 707  
49 708 23. Wilcox MH. Screening for MRSA. *BMJ* 2008;336(7650):899-900.  
50 709  
51 710  
52 711 24. Loeb M, Main C, Walker-Dilks C, et al. Antimicrobial drugs for treating methicillin-resistant *Staphylococcus*  
53 712 *aureus* colonization. *Cochrane Database Syst Rev* 2003;(4): CD003340.  
54 713  
55 714  
56 715 25. McGinagle KL, Gourlay ML, Buchanan IB. The use of active surveillance cultures in adult intensive care units  
57 716 to reduce methicillin-resistant *Staphylococcus aureus*-related morbidity, mortality, and costs: a systematic  
58 717 review. *Clin Infect Dis* 2008;46(11):1717-25.  
59 718  
60



- 1  
2  
3 719 26. Chowers MY, Paitan Y, Gottesman BS, et al. Hospital-wide Methicillin Resistant *Staphylococcus aureus*  
4 720 control program: A 5-year follow-up. *Inf control and hospital epidem* 2009;30(8):777-781.  
5 721  
6 722  
7 723 27. Huang SS, Yokoe DS, Hinrichsen VL, et al. Impact of routine intensive care unit surveillance cultures and  
8 724 resultant barrier precautions on hospital-wide methicillin-resistant *Staphylococcus aureus* bacteremia. *Clin*  
9 725 *Infect Dis*, 2006;43(8):971-8.  
10 726  
11 727  
12 728 28. Jain R, Kralovic SM, Evans ME, et al. Veterans Affairs initiative to prevent methicillin-resistant  
13 729 *Staphylococcus aureus* infections. *N Engl J Med*. 2011; 364(15):1419-30.  
14 730  
15 731  
16 732 29. Reilly JS, Stewart S, Christie P, et al. Universal screening for methicillin resistant *Staphylococcus aureus*:  
17 733 interim results from the NHS Scotland pathfinder project. *J of hospital Infection* 2010;74:35-41.  
18 734  
19 735  
20 736 30. Health Protection Scotland; National Services Scotland. NHS Scotland MRSA Screening Pathfinder  
21 737 Programme Final Report Volume 1: An investigation of the Clinical Effectiveness of MRSA Screening [Report].  
22 738 Glasgow: Health Protection Scotland; Feb 2011.  
23 739  
24 740  
25 741 31. Mahamat A, MacKenzie FM, Brooker K, et al. Impact of infection control interventions and antibiotic use on  
26 742 hospital MRSA: a multivariate interrupted time-series analysis. *Int J Antimicrob Agents* 2007;30(2):169-76.  
27 743  
28 744  
29 745 32. Monnet DL, Mackenzie FJ, Lopez-Lozano J-M, et al. Antimicrobial drug use and methicillin-resistant  
30 746 *Staphylococcus aureus*, Aberdeen, 1996-2000. *Emerg Infect Dis*. 2004;10:1432-41.  
31 747  
32 748  
33 749 33. Tacconelli E, De Angelis G, Cataldo MA, et al. Does antibiotic exposure increase the risk of methicillin-  
34 750 resistant *Staphylococcus aureus* (MRSA) isolation? A systematic review and meta-analysis. *Journal of*  
35 751 *Antimicrobial Chemotherapy*, 2008; 61: 26-38.  
36 752  
37 753  
38 754 34. Shardell M, Harris AD, El-Kamary SS, et al. Statistical analysis and application of quasi experiments to  
39 755 antimicrobial resistance intervention studies. *Clin Infect Dis*. 2007;45(7):901-7.  
40 756  
41 757  
42 758 35. Pakratz A. Forecasting with Dynamic regression Models. New York (NY): Wiley; 1991.  
43 759  
44 760  
45 761 36. Liu L-M, Hudak GB: Forecasting and time series analysis using the SCA statistical system. Chicago (IL):  
46 762 Scientific Computing Associates; 1994.  
47 763  
48 764  
49 765 37. Thwaites GE; United Kingdom Clinical Infection Research Group (UKCIRG). The management of  
50 766 *Staphylococcus aureus* bacteraemia in the United Kingdom and Vietnam: A multi-centre evaluation. *PLoS ONE*  
51 767 2010;5(12):e14170.  
52 768  
53 769  
54 770 38. Edwards B, Milne K, Lawes T, et al. Is Vancomycin MIC 'creep' method dependent? Analysis of methicillin-  
55 771 resistant *S. aureus* (MRSA) susceptibility trends in blood isolates from North East Scotland, 2006-10. *J Clin*  
56 772 *Microbiol*. Forthcoming 2011.  
57 773  
58 774  
59  
60

- 1  
2  
3 775 39. Hunt AC, Edwards B, Girvan EK, et al. Methicillin-resistant *Staphylococcus aureus* in northeastern Scotland  
4 776 in 2003 to 2007: evolving strain distribution and resistance patterns. *J Clin Microbiol* 2011; 49: 1975–8.  
5 777  
6 778  
7 779 40. Jeyaratnam D, Whitty CJM, Phillips K, et al. Impact of rapid screening tests on acquisition of methicillin  
8 780 resistant *Staphylococcus aureus*: cluster randomised crossover trial. *BMJ* 2008;336: 927-30.  
9 781  
10 782  
11 783 41. Harbarth S, Fankhauser C, Schrenzel J, et al: Universal screening for methicillin resistant *Staphylococcus*  
12 784 *aureus* at hospital admission and nosocomial infection in surgical patients. *JAMA* 2008; 299:1149-57.  
13 785  
14 786  
15 787 42. Robicsek A, Beaumont JL, Paule SM, et al. Universal surveillance for methicillin-resistant *Staphylococcus*  
16 788 *aureus* in 3 affiliated hospitals. *Ann Intern Med.* 2008;148(6):409-18.  
17 789  
18 790  
19 791 43. MacKenzie FM, Lopez-Lozano JM, Monnet DL, et al. Temporal relationship between prevalence of  
20 792 methicillin-resistant *Staphylococcus aureus* (MRSA) in one hospital and prevalence of MRSA in the surrounding  
21 793 community: a time-series analysis. *J Hosp Infect* 2007;67(3):225-31.  
22 794  
23 795  
24 796 44. Graham PL, Morel AS, Zhou J, et al. Epidemiology of methicillin-susceptible *Staphylococcus aureus* in the  
25 797 neonatal intensive care unit. *Infect Control Hosp Epidemiol* 2002;23(11):677-82.  
26 798  
27 799  
28 800 45. Seybold U, Schubert S, Bogner JR, et al. *Staphylococcus aureus* infection following nasal colonisation: an  
29 801 approach to rapid risk stratification in a university healthcare system. *J Hosp Infect* 2011; 79(4): 297-301.  
30 802  
31 803  
32 804 46. Honda H, Krauss MJ, Coopersmith CM, et al: *Staphylococcus aureus* nasal colonization and subsequent  
33 805 infection in intensive care unit patients: does methicillin resistance matter? *Infect Control Hosp Epidemiol*  
34 806 2010;31(6):584-91.  
35 807  
36 808  
37 809 47. Harbarth S, Hawkey PM, Tenover F, et al. Update on screening and clinical diagnosis of methicillin-resistant  
38 810 *Staphylococcus aureus* (MRSA). *Int J Antimicrob Agents.* 2011;37(2):110-7  
39 811  
40 812  
41 813 48. Hacek DM, Paule SM, Thomson RB, et al. Implementation of a Universal Admission Surveillance and  
42 814 Decolonisation Program for Methicillin-Resistant *Staphylococcus aureus* (MRSA) reduces the number of MRSA  
43 815 and total number of *S. aureus* isolates reported by the clinical laboratory. *J Clin Microbiol* 2009;47(11):3749-52.  
44 816  
45 817  
46 818 49. Leonhardt KK, Yakusheva O, Phelan D, et al. Clinical effectiveness and cost benefit of universal versus  
47 819 targeted methicillin-resistant *Staphylococcus aureus* screening upon admission in hospitals. *Infect Control*  
48 820 *Hosp Epidemiol* 2011;32(8):797-803.  
49 821  
50 822  
51 823 50. Hardy K, Price C, Szczepura A, et al. Reduction in the rate of methicillin-resistant *Staphylococcus aureus*  
52 824 acquisition in surgical wards by rapid screening for colonization: a prospective, cross-over study. *Clin Microbiol*  
53 825 *Infect* 2009; 16:333-339.  
54 826  
55 827  
56 828 51. Walker S, Peto TEA, O'Conner L, et al. Are there better methods of monitoring MRSA control than  
57 829 bacteraemia surveillance? An observational database study. *PLoS ONE* 2008;3:e2378.  
58 830  
59 831  
60

- 1  
2  
3 832 52. Salgado CD, Farr BM, Calfee DP. Community-acquired methicillin-resistant *Staphylococcus aureus*: a meta-  
4 833 analysis of prevalence and risk factors. *Clin Infect Dis* 2003;36: 131-139.  
5 834  
6 835  
7 836 53. Wyllie DH, Peto TEA, Crook D. MRSA bacteraemia in patients on arrival in hospital: a cohort study in  
8 837 Oxfordshire 1997-2003. *BMJ* 2005;331(7523):992-7.  
9 838  
10 839  
11 840 54. van Velzen EV, Reilly JS, Kavanagh K, et al. A retrospective cohort study into acquisition of MRSA and  
12 841 associated risk factors after implementation of universal screening in Scottish hospitals. *Infect Control Hosp*  
13 842 *Epidemiol.* 2011;32(9):889-96.  
14 843  
15 844  
16 845 55. Murthy A, De Angelis G, Pittet D, et al. Cost-effectiveness of universal MRSA screening on admission to  
17 846 surgery. *Clin Microbiol Infect.* 2010;16(12):1747-53.  
18 847  
19 848  
20 849 56. Hubben G, Bootsma M, Luteijn M, et al. Modelling the costs and effects of selective and universal hospital  
21 850 admission screening for Methicillin resistant *Staphylococcus aureus*. *PLoS ONE* 2011;6(3):e14783.  
22 851  
23 852  
24 853 57. Lee BY, Bailey RR, Smith KJ, et al. Universal methicillin-resistant *Staphylococcus aureus* (MRSA) surveillance  
25 854 for adults at hospital admission: an economic model and analysis. *Infect Control Hosp Epidemiol*  
26 855 2010;31(6):598-606.  
27 856  
28 857  
29 858 58. Collins J, Raza M, Ford M, et al. Review of a three-year methicillin-resistant *Staphylococcus aureus* screening  
30 859 programme. *J Hosp Infect.* 2011;78(2):81-5.  
31 860  
32 861  
33 862 59. Kirkland KB. Taking off the gloves: Towards a less dogmatic approach to the use of contact isolation.  
34 863 *Clinical Infectious Diseases* 2009;48:766-771.  
35 864  
36 865  
37 866 60. Health Protection Scotland: Protocol for CRA MRSA Screening National Rollout in Scotland. Glasgow: Health  
38 867 Protection Scotland; 2<sup>nd</sup> September 2011.  
39 868  
40 869  
41 870 61. Morgan DJ, Day HR, Furuno JP, et al. Improving efficiency in active surveillance for methicillin-resistant  
42 871 *Staphylococcus aureus* or vancomycin-resistant *Enterococcus* at hospital admission. *Infect Control Hosp*  
43 872 *Epidemiol* 2010; 31(12):1230-5.  
44 873  
45 874  
46 875 62. Hetem DJ, de Ruiter SC, Buiting AG, et al. Preventing *Staphylococcus aureus* bacteremia and sepsis in  
47 876 patients with *Staphylococcus aureus* colonization of intravascular catheters: a retrospective multicenter study  
48 877 and meta-analysis. *Medicine* 2011;90(4):284-8.  
49 878  
50 879  
51 880 63. Lucet JC, Regnier B. Screening and decolonization: does methicillin-susceptible *Staphylococcus aureus* hold  
52 881 lessons for methicillin-resistant *S. aureus*? *Clin Infect Dis* 2010;51(5):585-90.  
53 882  
54 883  
55 884 64. Gwizdala RA, Miller M, Bhat M, et al. *Staphylococcus aureus* colonization and infection among drug users:  
56 885 identification of hidden networks. *Am J Public Health.* 2011;101(7):1268-76.  
57 886  
58 887  
59  
60

65. Saxena AK, Panhotra BR, Venkateshappa CK, et al. The impact of nasal carriage of methicillin-resistant and methicillin-susceptible *Staphylococcus aureus* (MRSA & MSSA) on vascular access-related septicemia among patients with type-II diabetes on dialysis. *Ren Fail*. 2002;24(6):763-777.

## FIGURE LEGENDS

Footnotes in small plain script.

### Figure 1: Study timeline

### Figure 2: Rates of *S.aureus* bacteraemia by age-group, length of stay and days from admission

$P < 0.01$  for all linear regression lines. Note logarithmic scale for Length-of-stay. Linear trend fitted after logarithmic transformation.

### Figure 3: Secular trends in prevalence density and all-cause 30-day mortality after *S. aureus* bacteraemia by methicillin resistance

Data aggregated in 3 month blocks. Lines represent results of trend analysis, using Poisson regression with time (month) as sole explanatory variable.

### Figure 4: Adherence to MRSA admission testing during universal surveillance (August 2008 to December 2010)

\* Special study period (February 2010 to August 2010) involved a trial of axillae and groin swabs.

### Figure 5: Observed trends and multivariate transfer model predictions for prevalence density,<sup>\*</sup> hospital associated incidence density<sup>†</sup> and 30-day mortality in MRSA bacteraemia<sup>‡</sup> and % of *S.aureus* bacteraemia involving MRSA<sup>§</sup>

\* Prevalence density ( $t$ ) =  $0.189 + 0.044 * \text{Length-of-stay}(t-1) - 0.315 * \text{prevalence-density}(t-6) - 0.053 * U(t)$ .

† HA-associated incidence density ( $t$ ) =  $0.100 + 0.476 * \text{HA incidence-density}(t-1) - 0.062 * U(t)$ .

‡ 30-day mortality ( $t$ ) =  $0.189 + 0.454 * \% \text{BedOcc}(t-2) - 0.349 * 30\text{-day mortality}(t-6) - 11.0 * U(t)$ .

§ %SABsMRSA ( $t$ ) =  $0.189 + 0.360 * \% \text{BedOcc}(t-4) - 0.457 * \% \text{SABsMRSA}(t-9) - 0.293 * \% \text{SABsMRSA}(t-1) - 18.8 * U(t)$ .

Where; LoS = length-of-stay; %BedOcc = Monthly average bed-occupancy (%) weighted by admitting department; %SABsMRSA = proportion of *S.aureus* bacteraemia involving MRSA; U = Universal Admission Screening intervention (=0 before introduction, = 1 after introduction);  $t$  = present time(month); and  $j$  ( $t - n$ ) is value of parameter ( $j$ ) at  $n$  months prior to the present time ( $t$ ).

1  
2  
3  
4  
5  
6  
7  
8  
9  
10  
11  
12  
13  
14  
15  
16  
17  
18  
19  
20  
21  
22  
23  
24  
25  
26  
27  
28  
29  
30  
31  
32  
33  
34  
35  
36  
37  
38  
39  
40  
41  
42  
43  
44  
45  
46  
47  
48  
49  
50  
51  
52  
53  
54  
55  
56  
57  
58  
59  
60

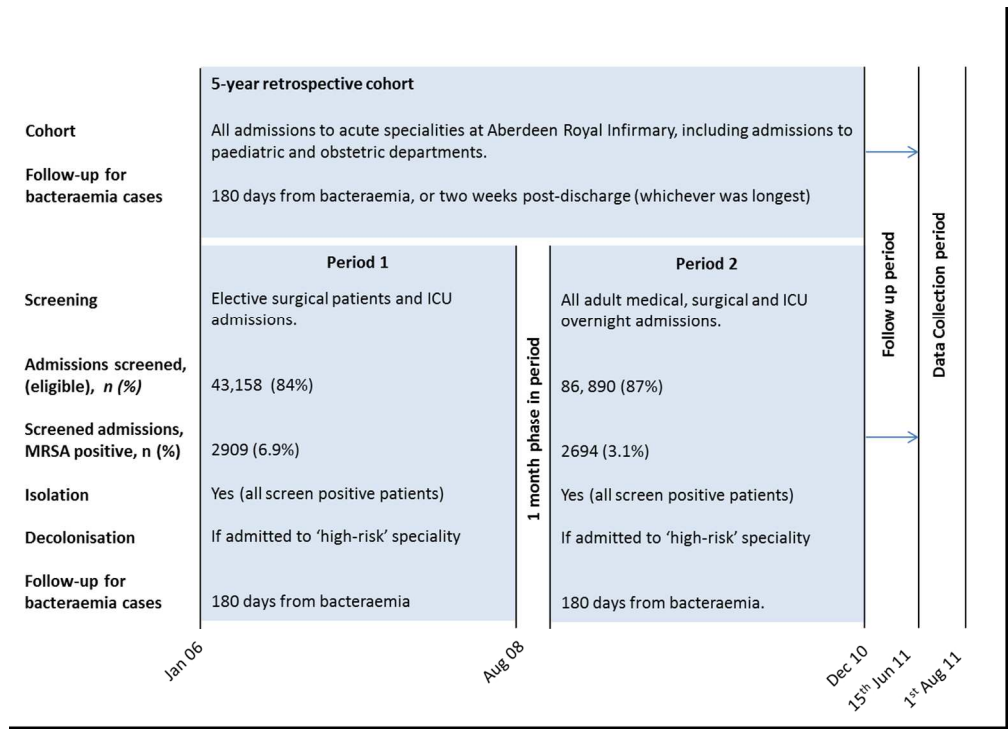

Study timeline

view only

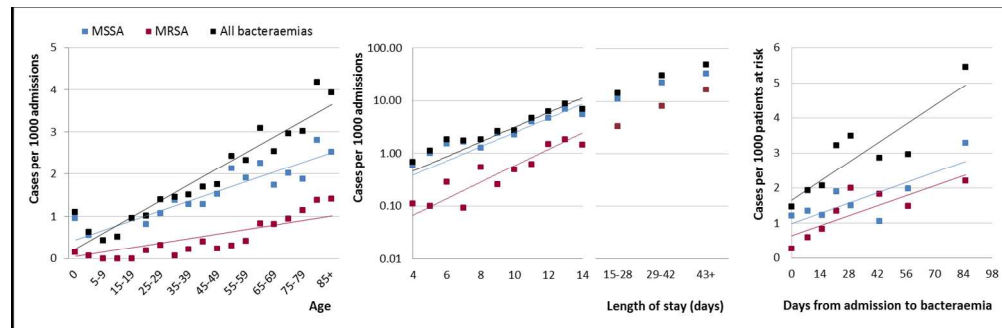

### Rates of *S.aureus* bacteraemia by age-group, length of stay and days from admission

$P < 0.01$  for all linear regression lines. Note logarithmic scale for Length-of-stay. Linear trend fitted after logarithmic transformation.

peer review only

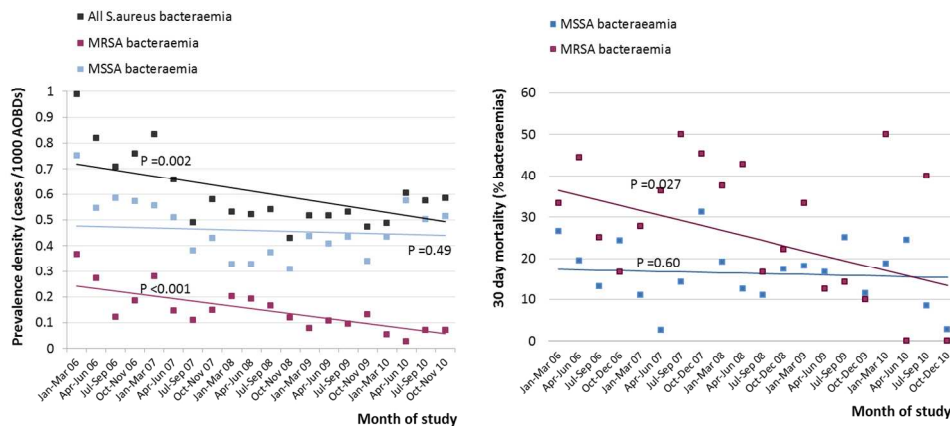

**Secular trends in prevalence density and all-cause 30-day mortality after S. aureus bacteraemia by methicillin resistance**

Data aggregated in 3 month blocks. Lines represent results of trend analysis, using Poisson regression with time (month) as sole explanatory variable.

Peer review only

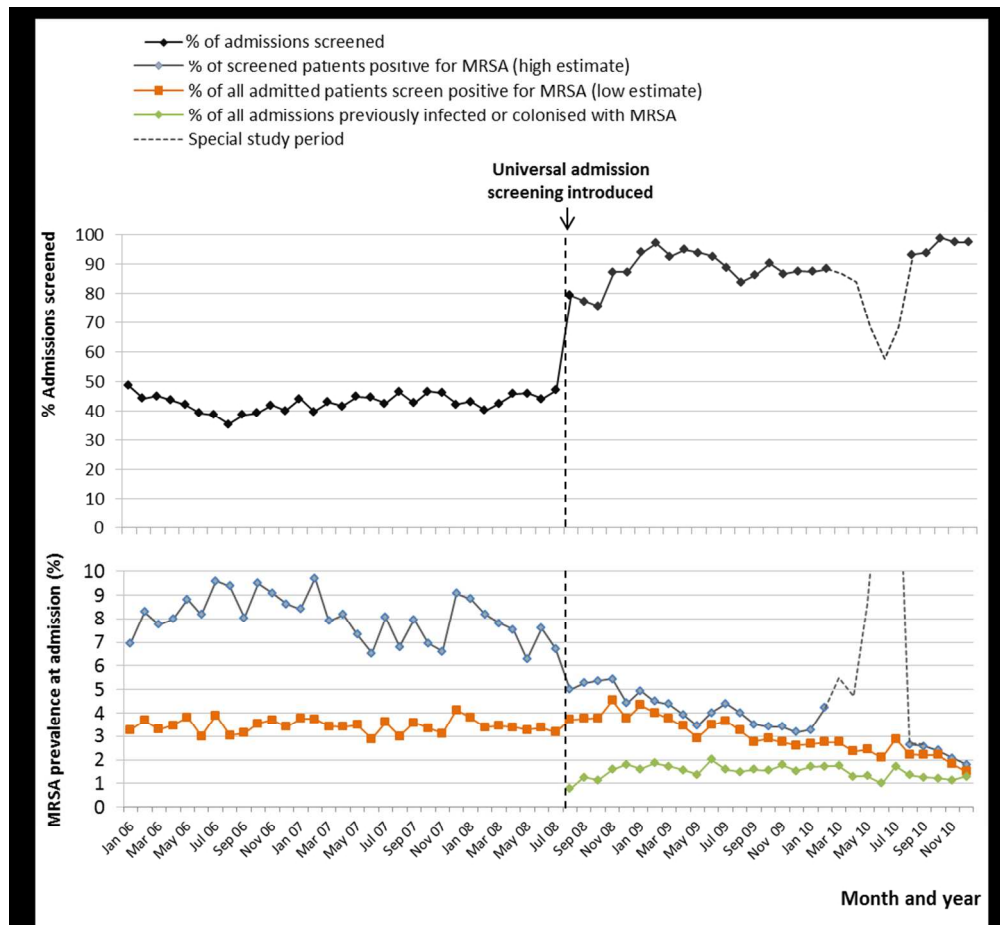

**Adherence to MRSA admission testing during universal surveillance (August 2008 to December 2010)**

\* Special study period (February 2010 to August 2010) involved a trial of axillae and groin swabs.

only



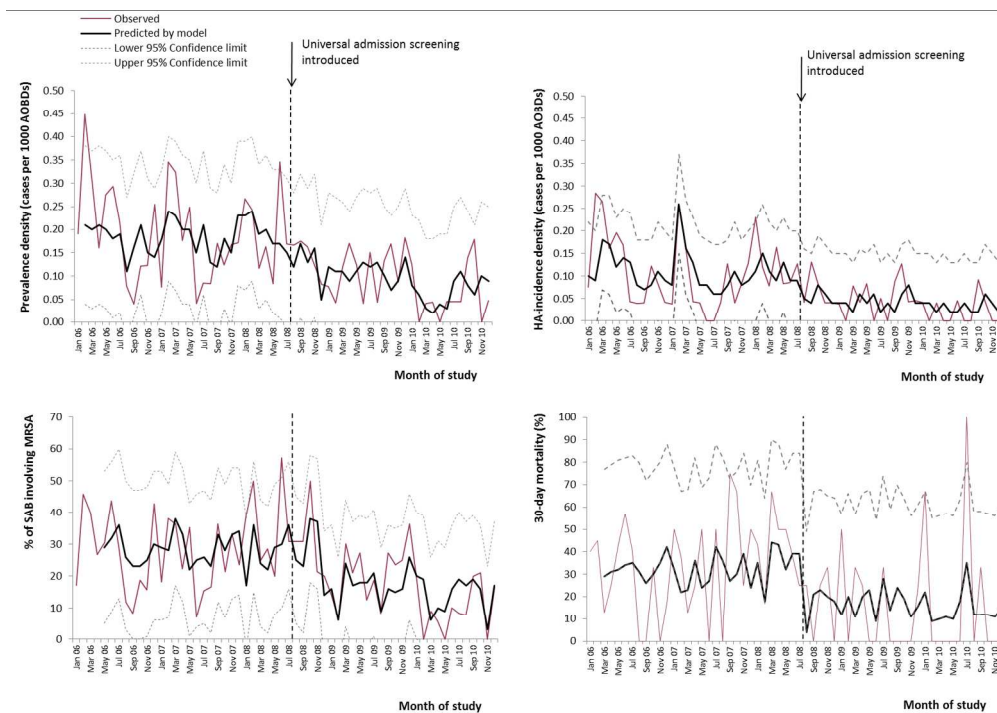

**Observed trends and multivariate transfer model predictions for prevalence density, hospital associated incidence density and 30-day mortality in MRSA bacteraemia and % of *S.aureus* bacteraemia involving MRSA**

View only

1  
2  
3  
4  
5  
6  
7  
8  
9  
10  
11  
12  
13  
14  
15  
16  
17  
18  
19  
20  
21  
22  
23  
24  
25  
26  
27  
28  
29  
30  
31  
32  
33  
34  
35  
36  
37  
38  
39  
40  
41  
42  
43  
44  
45  
46  
47  
48  
49  
50  
51  
52  
53  
54  
55  
56  
57  
58  
59  
60

## STROBE Statement—Checklist of items that should be included in reports of cohort studies

**Study:** Trends in *Staphylococcus aureus* bacteraemia and impacts of universal MRSA admission screening in a hospital in Scotland, 2006-2010: retrospective cohort study and time series intervention analysis

**Authors:** Timothy Lawes, Becky Edwards, José-Maria López-Lozano, Ian M Gould

**Submitted:** 03/01/2012

|                           | Item No | Recommendation                                                                                                                           | Identification in manuscript |                            | Notes                                                                                                                                                                                                         |
|---------------------------|---------|------------------------------------------------------------------------------------------------------------------------------------------|------------------------------|----------------------------|---------------------------------------------------------------------------------------------------------------------------------------------------------------------------------------------------------------|
|                           |         |                                                                                                                                          | Page                         | Line                       |                                                                                                                                                                                                               |
| <b>Title and abstract</b> | 1       | (a) Indicate the study's design with a commonly used term in the title or the abstract                                                   | 1 & 2                        | Title, 6-7                 | <b>See Title and Abstract:</b><br>Retrospective cohort study and time series intervention analysis<br>Brief explanation of key methods                                                                        |
|                           |         | (b) Provide in the abstract an informative and balanced summary of what was done and what was found                                      | 3                            | 1-34                       | <b>See Abstract:</b><br>Structured abstract.<br>Main results given as absolute changes.                                                                                                                       |
| <b>Introduction</b>       |         |                                                                                                                                          |                              |                            |                                                                                                                                                                                                               |
| Background/<br>rationale  | 2       | Explain the scientific background and rationale for the investigation being reported                                                     | 4                            | 36-63                      | <b>See Background</b>                                                                                                                                                                                         |
| Objectives                | 3       | State specific objectives, including any prespecified hypotheses                                                                         | 4                            | 65-69                      | <b>See Background</b><br>Pre-specified null hypothesis of no impact of screening above other infection control measured.                                                                                      |
| <b>Methods</b>            |         |                                                                                                                                          |                              |                            |                                                                                                                                                                                                               |
| Study design              | 4       | Present key elements of study design early in the paper                                                                                  | 5                            | 72-77                      | <b>See Methods: Study design</b>                                                                                                                                                                              |
| Setting                   | 5       | Describe the setting, locations, and relevant dates, including periods of recruitment, exposure, follow-up, and data collection          | 5                            | 123-124, 87, 79-84, Fig 1. | <b>See Methods: Setting, Study design and Admission screening intervention; and fig 1.</b><br>Dates of study<br>Date of intervention<br>Setting<br>Periods of recruitment, exposure, f/u and data collection. |
| Participants              | 6       | (a) Give the eligibility criteria, and the sources and methods of selection of participants. Describe methods of follow-up               | 6&7                          | 123-132                    | <b>See Methods: Study Population</b>                                                                                                                                                                          |
|                           |         | (b) For matched studies, give matching criteria and number of exposed and unexposed                                                      | NA                           | NA                         | (No. exposed to screening in each time period provided in fig 1.)                                                                                                                                             |
| Variables                 | 7       | Clearly define all outcomes, exposures, predictors, potential confounders, and effect modifiers. Give diagnostic criteria, if applicable | 6 &<br>Box                   | 104-118                    | <b>See Methods: Outcomes and potential confounders</b>                                                                                                                                                        |
| Data sources/             | 8*      | For each variable of interest, give                                                                                                      | 7                            | 135 -157                   | <b>See Methods: Data collection</b>                                                                                                                                                                           |

|                        |     |                                                                                                                                                                                                   |                               |                                                     |                                                                                                        |
|------------------------|-----|---------------------------------------------------------------------------------------------------------------------------------------------------------------------------------------------------|-------------------------------|-----------------------------------------------------|--------------------------------------------------------------------------------------------------------|
| measurement            |     | sources of data and details of methods of assessment (measurement). Describe comparability of assessment methods if there is more than one group                                                  |                               |                                                     |                                                                                                        |
| Bias                   | 9   | Describe any efforts to address potential sources of bias                                                                                                                                         | 6                             | 105-118                                             | <b>Methods: Outcomes and potential confounders and Study population</b>                                |
| Study size             | 10  | Explain how the study size was arrived at                                                                                                                                                         | 7                             | 124-127                                             | <b>See Study population:</b> 60 month time series with 32 months of follow up allowed robust analysis. |
| Quantitative variables | 11  | Explain how quantitative variables were handled in the analyses. If applicable, describe which groupings were chosen and why                                                                      | 6 & 8<br>Box 1                |                                                     | <b>Methods: Outcomes and potential confounders; Statistical analysis.</b>                              |
| Statistical methods    | 12  | (a) Describe all statistical methods, including those used to control for confounding                                                                                                             | 8-9                           | 165-210                                             | <b>See Statistical analysis</b>                                                                        |
|                        |     | (b) Describe any methods used to examine subgroups and interactions                                                                                                                               | 8-10                          | 218-274                                             | <b>See Statistical analysis</b>                                                                        |
|                        |     | (c) Explain how missing data were addressed                                                                                                                                                       | 7                             | 149-153                                             | <b>See Data collection</b>                                                                             |
|                        |     | (d) If applicable, explain how loss to follow-up was addressed                                                                                                                                    | 7                             | 149-153                                             | <b>See Data collection</b>                                                                             |
|                        |     | (e) Describe any sensitivity analyses                                                                                                                                                             | -                             | -                                                   | None described or used.                                                                                |
| <b>Results</b>         |     |                                                                                                                                                                                                   |                               |                                                     |                                                                                                        |
| Participants           | 13* | (a) Report numbers of individuals at each stage of study—eg numbers potentially eligible, examined for eligibility, confirmed eligible, included in the study, completing follow-up, and analysed | 10                            | 243-245                                             | <b>See Descriptive epidemiology,</b> Cohort and rates of S.aureus bacteraemia:                         |
|                        |     | (b) Give reasons for non-participation at each stage                                                                                                                                              | 10                            | 243-245                                             | <b>See Descriptive epidemiology,</b> Cohort and rates of S.aureus bacteraemia and <b>fig 1.</b>        |
|                        |     | (c) Consider use of a flow diagram                                                                                                                                                                |                               |                                                     | Not used.                                                                                              |
| Descriptive data       | 14* | (a) Give characteristics of study participants (eg demographic, clinical, social) and information on exposures and potential confounders                                                          | 10 & 13-14<br>Tables<br>1 & 4 | 251-263<br>Table 1<br>315-353<br>343-348<br>Table 4 | <b>See a) Descriptive epidemiology, b) Impacts of universal MRSA admission screening</b>               |
|                        |     | (b) Indicate number of participants with missing data for each variable of interest                                                                                                               | 10 & 14                       | -                                                   | <b>Table 1</b><br><b>Table 4</b>                                                                       |
|                        |     | (c) Summarise follow-up time (eg, average and total amount)                                                                                                                                       | 10                            | 243-245                                             | <b>See Descriptive epidemiology</b> Cohort and rates of S.aureus bacteraemia:                          |

|                          |     |                                                                                                                                                                                                              |                        |                                                                           |                                                                                                                                                   |
|--------------------------|-----|--------------------------------------------------------------------------------------------------------------------------------------------------------------------------------------------------------------|------------------------|---------------------------------------------------------------------------|---------------------------------------------------------------------------------------------------------------------------------------------------|
| Outcome data             | 15* | Report numbers of outcome events or summary measures over time                                                                                                                                               | 10, 11, 12, 12, 14, 15 | 247-251<br>Table 1<br>268-271<br>296-308<br>Table 3<br>Table 4<br>Table 5 | <b>See Results:</b><br><b>a) Descriptive epidemiology</b><br><b>b) Secular trends</b><br><b>c) Impacts of universal MRSA admission screening.</b> |
| Main results             | 16  | (a) Give unadjusted estimates and, if applicable, confounder-adjusted estimates and their precision (eg, 95% confidence interval). Make clear which confounders were adjusted for and why they were included | 15                     | Table 5<br>358-368                                                        | <b>See results:</b><br><b>a) Secular trends</b><br><b>b) Impacts of universal MRSA admission screening</b><br><b>c) Table 2,3,5 and 6</b>         |
|                          |     | (b) Report category boundaries when continuous variables were categorized                                                                                                                                    | -                      | -                                                                         | Not used.                                                                                                                                         |
|                          |     | (c) If relevant, consider translating estimates of relative risk into absolute risk for a meaningful time period                                                                                             | 16 & 17                | 476-482<br>503-516                                                        | See results:<br>a) Impacts of universal MRSA admission screening.<br>b) Tables 5 and 6<br>Absolute and relative change in outcomes reported       |
| Other analyses           | 17  | Report other analyses done—eg analyses of subgroups and interactions, and sensitivity analyses                                                                                                               | -                      | -                                                                         | <b>See results: Trends and time series analysis</b><br>Not disaggregation by methicillin sensitivity throughout.                                  |
| <b>Discussion</b>        |     |                                                                                                                                                                                                              |                        |                                                                           |                                                                                                                                                   |
| Key results              | 18  | Summarise key results with reference to study objectives                                                                                                                                                     | 16                     | 405-411                                                                   | <b>See Discussion</b> (first section)                                                                                                             |
| Limitations              | 19  | Discuss limitations of the study, taking into account sources of potential bias or imprecision. Discuss both direction and magnitude of any potential bias                                                   | 16-17                  | 413-455                                                                   | <b>See Discussion, Strengths &amp; Limitations</b>                                                                                                |
| Interpretation           | 20  | Give a cautious overall interpretation of results considering objectives, limitations, multiplicity of analyses, results from similar studies, and other relevant evidence                                   | 17-18                  | 462-500                                                                   | <b>See Discussion, Comparison to literature</b>                                                                                                   |
| Generalisability         | 21  | Discuss the generalisability (external validity) of the study results                                                                                                                                        | 17                     | 457-460                                                                   | <b>See Discussion, Strengths &amp; Limitations</b>                                                                                                |
| <b>Other information</b> |     |                                                                                                                                                                                                              |                        |                                                                           |                                                                                                                                                   |
| Funding                  | 22  | Give the source of funding and the role of the funders for the present study and, if applicable, for the original study on which the present article is based                                                | 21                     | 582-584                                                                   | <b>See Funding.</b><br>No funding involved in this study.<br>Data includes outcomes from NHS pathfinder study commissioned by NHS Scotland.       |

\*Give information separately for exposed and unexposed groups.

Supplemental file 1: Admission screening strategy during universal surveillance

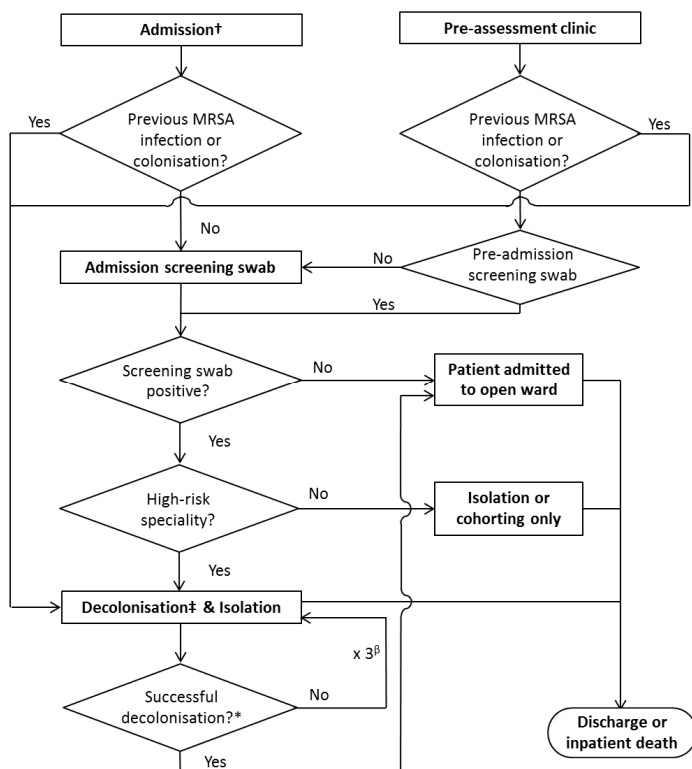

† Overnight admissions to acute specialities excluding paediatrics, obstetrics and psychiatry. ‡ Decolonisation involved 5-days of once-daily antiseptic body wash and thrice-daily mupirocin nasal ointment. \* Successful decolonisation assessed as three successive negative swabs  $\geq 2$  days post-decolonisation period.  $\beta$  If failure to decolonise after three attempts, referral to clinical microbiologist advised. Adapted from reference (27).

Supplemental file 2: Secular trends in mean patient age, length-of-stay and % bed occupancy by department and month

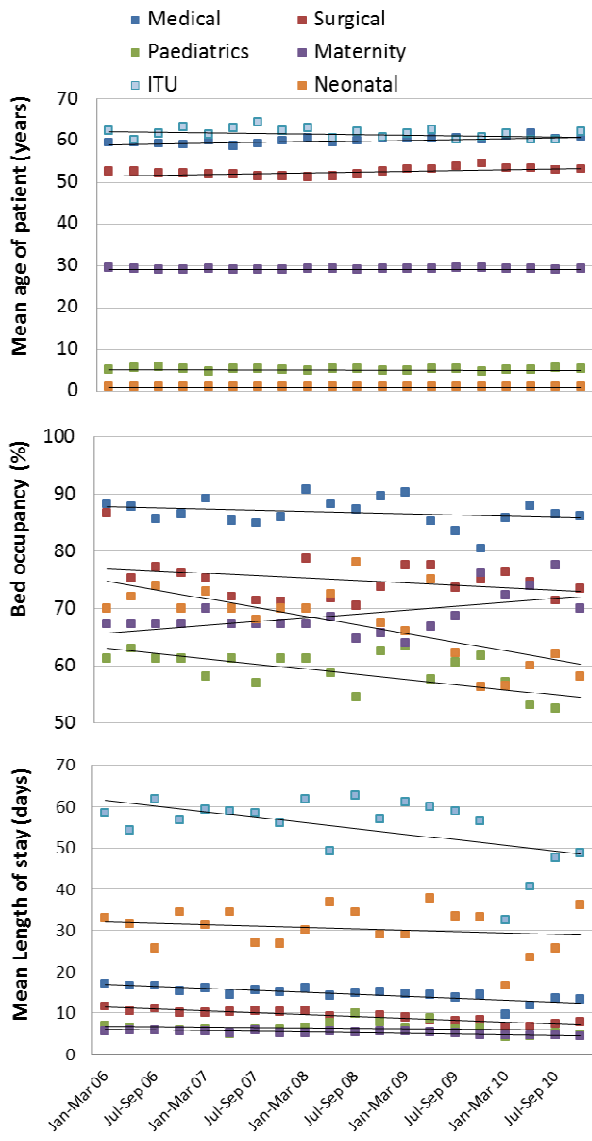

view only

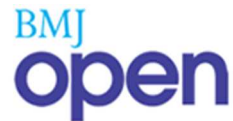

**Trends in *Staphylococcus aureus* bacteraemia and impacts of infection control practices including universal MRSA admission screening in a hospital in Scotland, 2006-2010: retrospective cohort study and time-series intervention analysis**

|                                 |                                                                                                                                                                                                                                                                                    |
|---------------------------------|------------------------------------------------------------------------------------------------------------------------------------------------------------------------------------------------------------------------------------------------------------------------------------|
| Journal:                        | <i>BMJ Open</i>                                                                                                                                                                                                                                                                    |
| Manuscript ID:                  | bmjopen-2011-000797.R1                                                                                                                                                                                                                                                             |
| Article Type:                   | Research                                                                                                                                                                                                                                                                           |
| Date Submitted by the Author:   | 20-Mar-2012                                                                                                                                                                                                                                                                        |
| Complete List of Authors:       | Lawes, Timothy; Raigmore Hospital, Paediatrics<br>Edwards, Becky; Aberdeen Royal Infirmary, Medical Microbiology<br>López-Lozano, José-Maria; Hospital Vega Baja, Epidemiology; Hospital Vega Baja, ViResiST project<br>Gould, Ian; Aberdeen Royal Infirmary, Medical Microbiology |
| <b>Primary Subject Heading</b>: | Infectious diseases                                                                                                                                                                                                                                                                |
| Secondary Subject Heading:      | Epidemiology, Public health                                                                                                                                                                                                                                                        |
| Keywords:                       | Infection control < INFECTIOUS DISEASES, Epidemiology < INFECTIOUS DISEASES, MICROBIOLOGY                                                                                                                                                                                          |
|                                 |                                                                                                                                                                                                                                                                                    |

SCHOLARONE™  
Manuscripts

1  
2  
3 **Trends in *Staphylococcus aureus* bacteraemia and impacts of infection**  
4 **control practices including universal MRSA admission screening in a hospital**  
5 **in Scotland, 2006-2010: retrospective cohort study and time-series**  
6 **intervention analysis**  
7  
8

9  
10 Timothy Lawes, Becky Edwards, José-Maria López-Lozano, Ian M Gould

11 **Keywords:** Methicillin Resistance, Staphylococcus aureus, bacteraemia, mass screening, intervention  
12 studies, cohort studies, inpatients  
13

14 **Authors:**

15 Timothy Lawes:

16 Department of Paediatrics, Raigmore Hospital, Inverness, UK.

17 Foundation year 2 (FY2) doctor.  
18

19  
20  
21  
22 Becky Edwards:

23 Department of Medical Microbiology, Aberdeen Royal Infirmary, Foresterhill Road, Aberdeen, UK.  
24 Specialist registrar in Medical Microbiology  
25

26  
27  
28 José-Maria López-Lozano:

29 Preventive Medicine Unit, Hospital Vega Baja, Orihuela (Alicante), Spain.

30 Principal researcher on ViResiST project.  
31

32  
33 Ian M Gould:

34 Department of Medical Microbiology, Aberdeen Royal Infirmary, Foresterhill Road, Aberdeen, UK.  
35 Consultant in Medical Microbiology.  
36

37  
38 Correspondence to: Timothy Lawes. Email: [t.lawes@nhs.net](mailto:t.lawes@nhs.net). Tel +44 (0) 1224 554951; Fax +44 (0)  
39 1224 550632  
40

41 **Copyright :** The Corresponding Author has the right to grant on behalf of all authors and does grant  
42 on behalf of all authors, a worldwide licence to the Publishers and its licensees in perpetuity, in all  
43 forms, formats and media (whether known now or created in the future), to i) publish, reproduce,  
44 distribute, display and store the Contribution, ii) translate the Contribution into other languages,  
45 create adaptations, reprints, include within collections and create summaries, extracts and/or,  
46 abstracts of the Contribution, iii) create any other derivative work(s) based on the Contribution, iv)  
47 to exploit all subsidiary rights in the Contribution, v) the inclusion of electronic links from the  
48 Contribution to third party material where-ever it may be located; and, vi) licence any third party to  
49 do any or all of the above.  
50

51 **Word Count:**

52 *Abstract* : 299

53 *Introduction* : 361

54 *Methods* : 1499

55 *Results* : 1304

56 *Discussion* : 1939

57 *Main Manuscript (excluding abstract)* : 5083  
58  
59  
60



**ARTILCE SUMMARY****Article focus**

- This study describes the changing epidemiology of MRSA and MSSA bacteraemia in a large inpatient population from Scotland over a five year period
- Secondly, it evaluates the impact of universal MRSA admission screening, and other infection control practices, on hospital-wide rates of MRSA bacteramia.

**Key messages:**

- Recent declines in clinical burdens from *S.aureus* bacteraemia in North East Scotland were attributable to a reduction in invasive MRSA infections.
- Compared to a strategy of targeted screening in high-risk environments, universal admission screening may significantly reduce rates of MRSA bacteraemia and associated early mortality alongside improvements in antibiotic stewardship and infection control.
- Strategies to reduce clinical burdens from MSSA bacteraemia are required if progress towards national targets for all *S.aureus* bacteraemia is to be sustained.

**Strengths and limitations**

- Without a contemporary control, this study did not prove causality but a temporal association between universal admission screening and rates of MRSA bacteraemia.
- ARIMA modelling accounted for the non-independence of data and stochastic elements in time-series of infections, and the dynamic effects of changes in other aspects of care.
- Findings may be limited to large public hospitals with intensive care units and endemic MRSA but low rates of MRSA infection.

## 1 ABSTRACT

2  
3 **Objectives:** To describe secular trends in *Staphylococcus aureus* bacteraemia, and assess the impacts  
4 of infection control practices including universal MRSA admission screening on associated clinical  
5 burdens.

6  
7 **Design:** Retrospective cohort study and multivariate time-series analysis linking microbiology,  
8 patient management and health intelligence databases.

9  
10 **Setting:** Teaching hospital in North East Scotland.

11  
12 **Participants:** All patients admitted to Aberdeen Royal Infirmary between 1<sup>st</sup> January 2006 and 31<sup>st</sup>  
13 December 2010: n= 420,452 admissions and 1,430,052 acute occupied bed days (AOBDs).

14  
15 **Intervention:** Universal admission screening programme for MRSA (August 2008) incorporating  
16 isolation and decolonisation

17  
18 **Primary and secondary measures:** Hospital-wide prevalence density, hospital-associated (HA-  
19 )incidence density, and death within 30 days of MRSA or MSSA bacteraemia.

20  
21 **Results:** Between 2006 and 2010, prevalence density of all *S.aureus* bacteraemia declined by 41%,  
22 from 0.73 to 0.50 cases/1000 AOBDs ( $P = 0.002$  for trend), and 30-day mortality from 26% to 14% ( $P$   
23 = 0.013). Significant reductions were observed in MRSA bacteraemia only. Overnight admissions  
24 screened for MRSA rose from 43% during selective screening to >90% within four months of  
25 universal screening. In multivariate time-series analysis ( $R^2$  0.45 to 0.68) universal screening was  
26 associated with a 19% reduction in prevalence density of MRSA bacteraemia (-0.035, 95% CI: -0.049  
27 to -0.021/1000 AOBDs;  $P < 0.001$ ); a 29% fall in HA-incidence density (-0.029, -0.035 to -0.023/1000  
28 AOBDs;  $P < 0.001$ ) and a 46% reduction in 30-day mortality (-15.6, -24.1 to -7.1%;  $P < 0.001$ ). Positive  
29 associations with fluoroquinolone and cephalosporin use suggested that antibiotic stewardship  
30 reduced prevalence density of MRSA bacteraemia by 0.027 (0.015 to 0.039)/1000 AOBDs. Rates of  
31 MSSA bacteraemia were not significantly affected by screening or antibiotic use.

32  
33 **Conclusions:** Declining clinical burdens from *S.aureus* bacteraemia were attributable to reductions in  
34 MRSA infections. Universal admission screening and antibiotic stewardship were associated with

1  
2  
3  
4  
5  
6  
7  
8  
9  
10  
11  
12  
13  
14  
15  
16  
17  
18  
19  
20  
21  
22  
23  
24  
25  
26  
27  
28  
29  
30  
31  
32  
33  
34  
35  
36  
37  
38  
39  
40  
41  
42  
43  
44  
45  
46  
47  
48  
49  
50  
51  
52  
53  
54  
55  
56  
57  
58  
59  
60

35 decreases in MRSA bacteraemia and associated early mortality. Control of MSSA bacteraemia  
36 remains a priority.

37  
38  
39  
40  
41  
42  
43  
44  
45  
46  
47  
48  
49  
50  
51  
52  
53  
54  
55  
56  
57  
58  
59  
60

For peer review only

## INTRODUCTION

*Staphylococcus aureus* is an important cause of serious, invasive, and health care-associated infections worldwide.[1] In high-income countries it remains a leading cause of community and nosocomial bacteraemia,[2] associated with mortality rates of 20-50%,[3,4] and large economic burdens.[5] In the UK, dramatic increases in *S. aureus* bacteraemia (SAB) during the 1990s were attributed to methicillin resistant *S. aureus* (MRSA)[3,6] and healthcare exposures,[7] engendering aggressive public health responses.[8] A decade of national mandatory surveillance of both methicillin sensitive *Staphylococcus aureus* (MSSA) and MRSA bacteraemia has suggested impacts from infection control measures,[9,10] but there remain over 12,000 cases annually.[11,12]

Despite a steep reduction in MRSA bacteraemia from a peak in 2003/4, rates of MSSA bacteraemia have remained relatively stable.[11,12] Reasons for this MRSA specific decline are not fully understood.[9,10] Meanwhile, studies assessing the importance of methicillin resistance to outcomes after SAB have yielded conflicting results.[3,4,13-18] These uncertainties are reflected in different public health approaches: England and Wales implemented performance targets for reducing MRSA bacteraemia only,[9] while NHS Scotland's strategy aimed to reduce all SAB to 70% of 2005/6 by 2010.[19] Some authors have warned that policy focusing on MRSA alone, may have unintended adverse effects on control of MSSA.[20] It is therefore important to understand the evolving epidemiology of both MRSA and MSSA bacteraemia.[21]

UK policy on reducing burdens from MRSA has advocated admission screening, with subsequent decolonisation and isolation, despite weaknesses in evidence.[22-25] Studies on MRSA screening have generally assessed impacts on bacteraemia by surveillance in high-risk groups,[26,27] while studies of universal surveillance have taken all MRSA infections as the primary outcome.[25,28] In 2008, a universal screening strategy was piloted in three NHS Scotland trusts[29,30] providing an opportunity to assess effects on rates of MRSA bacteraemia, compared to a previous strategy of selective screening in high-risk environments.

This study aimed to describe the changing clinical epidemiology of SAB in a large inpatient population over a five year period, and to evaluate the impact of infection control measures including universal MRSA admission screening. Our pre-specified null-hypothesis was that universal screening would not significantly reduce rates of MRSA bacteraemia, after accounting for prior trends and changes in other aspects of care in time-series intervention analysis.

1  
2  
3 103 **METHODS**  
4

5 104

6  
7 105 **Study design:**

8 106 This retrospective cohort study described secular trends in *S.aureus* bacteraemia in all admissions to  
9 107 Aberdeen Royal Infirmary (ARI) between 2006 and 2010. A quasi-experimental before-and-after  
10 108 design used time series data from the same period to assess the impact of introducing universal  
11 109 admission surveillance on MRSA bacteraemia alongside other infection control practices (figure 1).  
12 110 Controls were historic trends in MRSA bacteraemia and concurrent trends in MSSA bacteraemia.  
13  
14  
15

16 111

17  
18 112 **Setting:**

19 113 ARI is a tertiary referral centre and acute teaching hospital (1000 beds, 85,000 annual admissions),  
20 114 serving a population of 500,000 in North East Scotland (*NHS Grampian*). It provides a full range of  
21 115 acute medical and surgical services with a 16-bedded intensive care unit (800 admissions yr<sup>-1</sup>) and a  
22 116 cardiac intensive care unit (6 beds, 600 admissions yr<sup>-1</sup>). Microbiology services also serve the on-site  
23 117 185-bedded maternity and 85-bedded children's hospitals.  
24  
25  
26  
27

28 118

29 119 **Admission Screening Intervention:**

30  
31 120 Universal admission screening for MRSA was introduced in NHS Grampian in August 2008 as part of  
32 121 an NHS Scotland pathfinder project detailed elsewhere.[29,30] This 32 month pilot study (ending  
33 122 March 2011) tested a strategy suggested as most clinically- and cost-effective by an NHS Scotland  
34 123 Health Technology Assessment (supplemental file 1).[29] This involved, screening of all overnight  
35 124 admissions to acute specialities (excluding obstetrics, paediatrics and psychiatry) by nasal (and  
36 125 wound or device as necessary) swabs; isolation or cohorting of all patients with known or new  
37 126 colonisation or infection with MRSA; and decolonising of all MRSA-positive patients admitted to any  
38 127 speciality. Decolonisation therapy included five days of daily body wash with 4% chlorhexidine  
39 128 gluconate and thrice-daily mupirocin nasal ointment. Patients were re-swabbed a minimum of two-  
40 129 days after decolonisation and could be removed from isolation on receipt of three successive  
41 130 negative swabs, taken ≥48 hours apart. Elective patients were screened at pre-admission assessment  
42 131 or on admission. Compliance with screening and infection control protocols was monitored. Prior to  
43 132 the intervention MRSA screening was performed on selected high-risk patients only, including  
44 133 intensive care and elective surgical admissions, with an identical strategy of isolation and  
45 134 decolonisation.  
46  
47  
48  
49  
50  
51  
52  
53  
54

55 135

56  
57 136  
58  
59  
60

1  
2  
3 137 **Outcomes and potential confounders:**

4 138 *S.aureus* bacteraemia was defined as the isolation of any *S. aureus* from  $\geq 1$  blood culture bottle.

5  
6 139 Cultures from the same patient within 14 days of the original isolate were considered to represent  
7  
8 140 the same episode. Patients could be included more than once in analysis for different episodes.

9  
10 141 Hospital-associated (HA-) bacteraemia was defined as isolation of *S. aureus* from blood cultures > 48  
11  
12 142 hours after admission or within 14 days of discharge, without previous history of bacteraemia or  
13  
14 143 MRSA colonisation or infection.

14  
15  
16 145 The primary outcome measure was prevalence density of MRSA and MSSA bacteraemia. Secondary  
17  
18 146 outcomes are detailed in box 1. Secular trends in longer-term outcomes were also investigated with  
19  
20 147 recurrence expressed as episodes per 1000 patient-months to avoid follow-up bias.

21  
22 149 In examining secular trends and the impacts of universal MRSA admission screening, we considered  
23  
24 150 changes in other aspects of care and case-mix including: MRSA importation pressure (No. of patients  
25  
26 151 MRSA-positive or with a history of MRSA at admission/1000 AOBs) length-of-stay,[3,13] bed-  
27  
28 152 occupancy,[7] patient age,[3,4,13] admitting department,[3] hand-hygiene,[9,32-35] and antibiotic  
29  
30 153 usage.[34-37] We considered the effects of other hospital-wide infection control measures with  
31  
32 154 potential to affect MRSA including a national hand-hygiene campaign (January 2007) and a mixed  
33  
34 155 persuasive and restrictive antibiotic stewardship intervention (May 2009) limiting use of antibiotics  
35  
36 156 associated with *C.difficile* and resistant gram-positive or gram-negative infections - figure 1 and  
37  
38 157 supplemental file 2.

37 158  
38 159 **Study population**

39 160 All patients admitted to medical, surgical, paediatric, and maternity services at ARI between 1<sup>st</sup>  
40  
41 161 January 2006 and 31<sup>st</sup> December 2010 were eligible for inclusion in the study. This period was  
42  
43 162 chosen as it included the time frame stated in national targets for reducing rates of SAB. A time  
44  
45 163 series of 60 months with equivalent baseline and intervention periods (31 and 29 months), also  
46  
47 164 facilitated a robust time-series analysis.[38] Outpatients in all specialities were excluded. Admissions  
48  
49 165 resulting in death or discharge within 24 hours were retained in the main analysis so as to capture  
50  
51 166 burdens from community-associated bacteraemia. Patients at risk of incident hospital-associated  
52  
53 167 bacteraemia were those hospitalised for at least 48 hours without previous documented SAB. Follow  
54  
55 168 up was until in-hospital death, 180 days from bacteraemia or a minimum of two weeks post-  
56  
57 169 discharge (whichever was longest), and ended on 15<sup>th</sup> June 2011.

1  
2  
3 170 **Data collection**

4 171 Electronic laboratory records were screened to identify admission screening swabs, previous or  
5 172 current MRSA colonisation or infection, episodes of *S.aureus* bacteraemia and location of sampling.  
6 173 Patient identifiers were used to identify multiple samples from the same patient.  
7  
8

9 174

10  
11 175 Health intelligence databases provided data on demographics, admission details and mortality for all  
12 176 admissions between 2006 and 2010. Aggregated data on bed-occupancy were also provided by  
13 177 month and department. For episodes of bacteraemia, data were triangulated using the hospital's  
14 178 Patient Management System. Numbers of admissions within the last 12 months and age were taken  
15 179 as a proxy of patients' baseline health.  
16  
17  
18

19 180

20  
21 181 Details on use of '4C' (Ciprofloxacin, Cephalosporins, Clindamycin, Co-amoxiclav) and macrolide  
22 182 antibiotics (defined daily doses (DDDs)/1000 AOBs) and hand-hygiene (Litres of alcohol gel  
23 183 used/1000 AOBs; monthly average hand-hygiene compliance assessed by nationally standardised  
24 184 audit of opportunity and technique) were ascertained from pharmacy and infection control  
25 185 departments.  
26  
27  
28

29 186

30  
31 187 Use of routinely collected data meant an almost complete dataset. Data on outcomes after  
32 188 discharge were missing for six patients (0.7%) with SAB and for obstetric or neonatal inpatients  
33 189 without bacteraemia. Outcomes were explored using a complete-case analysis or departments with  
34 190 complete data.  
35  
36

37 191

38 192 **Laboratory methods:**

39  
40 193 Screening swabs were tested by latex slide test after plating on chromogenic agar (Brilliance - Oxoid,  
41 194 UK), followed by confirmatory coagulase test. Antibiotic sensitivities were evaluated by disc-  
42 195 diffusion test. Processing of screening and clinical samples was carried out 24 hours a day, 7 days a  
43 196 week. After confirmation by laboratory staff, results were made immediately available on an  
44 197 electronic laboratory reporting system. Between 9am and 5pm daily, positive MRSA screens were  
45 198 verbally reported to nursing staff on relevant wards and infection control teams. Turnaround time  
46 199 was typically <24 hours. All *S.aureus* blood isolates were identified initially by agglutination, using  
47 200 the Prolex™ – Blue Staph Latex Kit (Pro-Lab), and subsequently by a Vitek™ instrument, using  
48 201 custom made Staphylococcus sensitivity cards (Biomerieux).  
49  
50  
51  
52

53 202

54 203  
55  
56  
57  
58  
59  
60

1  
2  
3 204 **Statistical analysis**

4 205

5  
6 206 Clinical epidemiology and secular trends:

7  
8 207

9 208 Comparisons between characteristics of MRSA and MSSA and non-bacteraemic inpatient cohorts  
10 209 were made by  $\chi^2$ , Mann-Whitney U or independent-samples *t*-tests. Univariate linear or logistic  
11 210 regression was used to model associations between risk factors and rates of SAB. An indirect  
12 211 standardised mortality ratio (SMR) was calculated to explore excess mortality in SAB, using all ARI  
13 212 inpatients between 2006 and 2010 as the reference population, and standardising by age, gender  
14 213 and speciality. Attributable mortality, defined as the excess mortality caused by bacteraemia, was  
15 214 calculated using matched controls from this inpatient reference group, as crude mortality rate in  
16 215 controls *minus* crude mortality rate after bacteraemia.

17 216

18 217 Restricting analysis to the *S.aureus* bacteraemia cohort, determinants of 30-day mortality were  
19 218 explored by multivariate logistic regression. *A priori* determinants of methicillin sensitivity, month  
20 219 and demographics were included in a multivariate model alongside significant variables from  
21 220 univariate analysis ( $p < 0.10$ ). Interaction terms were generated for terms significantly associated by  
22 221 Spearman rank correlation but retained only where contributing to model fit. Competing hazards of  
23 222 inpatient mortality and being discharged alive were further explored with multivariate Cox-  
24 223 regression, with censoring at date of discharge or death respectively. Length of stay was included as  
25 224 a time-dependent determinant of mortality.[16]

26 225

27 226 Secular trends in demographics, clinical characteristics, and outcomes in *S. aureus* bacteraemia  
28 227 cohorts, were evaluated by logistic or linear regressions, with month of isolate as the sole  
29 228 explanatory variable. Trends in rates were examined using Poisson regression, with Poisson  
30 229 distribution, log-link function and the natural logarithm of AOBs as the offset. Difference in trends  
31 230 by admitting department were assessed by an interaction term (department x month of study).  
32 231 Multivariate Poisson regression models assessed secular trends after adjusting for changes in case-  
33 232 mix.

34 233

35 234

36 235

37 236

38 237

39

40

41

42

43



1  
2  
3 238 Impacts of universal MRSA admission screening:  
4  
5 239

6 240 We conducted intervention analyses to model the effects of universal screening on SAB while  
7  
8 241 controlling for hand-hygiene, antibiotic use and other dynamic explanatory factors using the Linear  
9  
10 242 Transfer MRSA bacteraemia using the Linear Transfer Function identification method suggested by  
11  
12 243 Pankratz[39] After ensuring stationary series , an initial transfer function model was created, with 6  
13  
14 244 lags for all explanatory variables and an autoregressive term of order 1. An iterative process of  
15  
16 245 eliminating non-significant terms, and identifying further autoregressive or moving average terms  
17  
18 246 for parts of the model remaining unexplained, determined the most parsimonious LTF model. Model  
19  
20 247 parameters were estimated using unconditional least squares and goodness-of-fit evaluated by  $R^2$ .  
21  
22 248 Finally, diagnostic checks were used to determine whether models adequately represented times  
23  
24 249 series data. These included checking; the statistical significance of parameters, AR parameter  
25  
26 250 stationarity and MA parameter invertibility, and ACF and PACF of residuals to ensure remaining  
27  
28 251 variability was random. Analysis of concurrent trends in MSSA bacteraemia controlled for  
29  
30 252 unidentified aspects of care or infection control affecting the clinical epidemiology of SAB.  
31  
32 253

33  
34 254 Intervention analysis was conducted using SCA software (Chicago, IL, USA, 1992) as described by Liu  
35  
36 255 and Hudak.[40] All other analyses were performed using SPSS 19.0 for windows.  
37  
38 256  
39 257  
40 258  
41 259  
42 260  
43 261  
44 262  
45 263  
46 264  
47 265  
48 266  
49 267  
50 268  
51 269  
52 270  
53 271  
54 272  
55 273  
56 274  
57  
58  
59  
60

275 **RESULTS**

276

277 **Descriptive epidemiology**

278

279 Cohort and rates of *S.aureus* bacteraemia:

280

281 There were 430,452 admissions to ARI between 2006 and 2010, representing 1,430,052 acute  
 282 occupied bed days (8% Intensive Care Unit, ICU). The total number of days of follow-up was  
 283 7,578,805: median, 181 days (range 180 to 355 days) for episodes of SAB, and 16 days (14 to 129  
 284 days) for other admissions.

285

286 867 episodes of *S. aureus* bacteraemia were identified in 795 patients, including 208 cases of MRSA  
 287 bacteraemia (24%). 62% of MRSA and 44% of MSSA bacteraemia were hospital-associated ( $P <$   
 288 0.001). Overall prevalence density of SAB was 0.61/1,000 AOBs and HA-incidence density was  
 289 0.29/1,000 AOBs. Prevalence and HA-incidence were 2.1/1000 admissions and 3.0/1000  
 290 admissions, respectively. Patients with SAB were more likely to be male, older and admitted to  
 291 medical or ICU settings than the remainder inpatient population (table 1).

292

293

Table 1: Characteristics of inpatient cohorts with and without *S.aureus* bacteraemia, 2006-2010

| Characteristics                                       | Cohort              |                    |                 |                 | P-value*       |                   |
|-------------------------------------------------------|---------------------|--------------------|-----------------|-----------------|----------------|-------------------|
|                                                       | None<br>n = 419,585 | All SAB<br>n = 867 | MSSA<br>n = 659 | MRSA<br>n = 208 | MRSA<br>v MSSA | All SAB<br>v None |
| Overnight admissions                                  | 262,412 (63%)       | 864 (99%)          | 656 (99%)       | 206 (99%)       | 0.801          | <0.001            |
| Hospital associated (onset >48hrs)                    | 137,520 (33%)§      | 416 (48%)          | 287 (44%)       | 129 (62%)       | <0.001         | <0.001            |
| <b>Demographics</b>                                   |                     |                    |                 |                 |                |                   |
| Gender (female)                                       | 242,668 (58%)       | 287 (33%)          | 227 (34%)       | 60 (29%)        | 0.14           | <0.001            |
| Mean age in years (SD)                                | 56 (5)              | 58 (22)            | 55 (22)         | 65 (18)         | <0.001         | <0.001            |
| <b>Clinical background</b>                            |                     |                    |                 |                 |                |                   |
| Admitting department (all)                            |                     |                    |                 |                 | <0.001         | <0.001            |
| Medical                                               | 130,209 (31%)       | 600 (69%)          | 471 (72%)       | 129 (62%)       | 0.010          | <0.001            |
| Surgical                                              | 173,851 (41%)       | 173 (20%)          | 118 (18%)       | 55 (26%)        | 0.007          | <0.001            |
| ICU                                                   | 6206 (1%)           | 60 (7%)            | 37 (6%)         | 23 (11%)        | 0.007          | <0.001            |
| Paediatrics / neonatal                                | 47726 (10%)         | 27 (4%)            | 26 (4%)         | 1 (1%)          | 0.008          | <0.001            |
| Maternity                                             | 61593 (15%)         | 7 (1%)             | 7 (1%)          | 0 (0%)          | 0.136          | <0.001            |
| Previous <i>S. aureus</i> bacteraemia                 | - <sup>a</sup>      | 73 (9%)            | 49 (8%)         | 24 (12%)        | 0.068          | -                 |
| MRSA colonisation at admission (%) <sup>β</sup>       | 8134 (4.3%)         | 160 (19%)          | 72 (11%)        | 88 (43%)        | <0.001         | <0.001            |
| Admission within past 12 months                       | - <sup>a</sup>      | 522 (60%)          | 366 (56%)       | 156 (75%)       | <0.001         | -                 |
| Median (IQR) time from admission to bacteraemia, days | -                   | 2 (0 to 9)         | 1 (0 to 7)      | 7 (0 to 19)     | 0.002          | -                 |
| <b>Outcomes</b>                                       |                     |                    |                 |                 |                |                   |
| 30-day mortality                                      | -                   | 173 (20%)          | 110 (17%)       | 63 (30%)        | <0.001         | -                 |
| In hospital death                                     | 7165 (2%)‡          | 209 (25%)‡         | 134 (21%)‡      | 75 (36%)‡       | <0.001         | <0.001            |
| Median (IQR) length-of-stay, days                     | 3.8 (3.4 -3.9)      | 20 (11 to 39)      | 19 (10 to 37)   | 27 (14 to 52)   | <0.001         | <0.001            |
| Readmission (≤ 14 days)†                              | 26,534 (8%)‡        | 119 (19%)‡         | 86 (17%)‡       | 33 (25%)‡       | 0.036          | <0.001            |
| Treatment failure                                     | -                   | 42 (4.8%)          | 31 (4.7%)       | 13 (6.3%)       | 0.732          | -                 |
| Recurrence rate (100 patient yrs <sup>-1</sup> )      | -                   | 0.78               | 0.81            | 1.26            | 0.627          | -                 |

Data are n (%), mean (SD), or median (IQR). § Patients without bacteraemia admitted > 48hrs. \*  $\chi^2$ , Mann-Whitney U, or independent-samples t-test. <sup>a</sup> data not available. <sup>β</sup> % eligible admissions. † In those alive at discharge, ‡ Excluding admissions to maternity and neonatal departments (data not available, n = 65,849) and episodes of SAB with incomplete data (n=6) associated with survival at discharge.

294

295

296

297 There were strong associations between rate of SAB and age, days since admission and length-of-  
 298 stay (figure 2). Patients colonised with MRSA at admission were 17 times more likely to develop  
 299 hospital-associated MRSA bacteraemia (0.78 cases 1000 AOBDS<sup>-1</sup>) than those not colonised (0.05  
 300 cases 1000 AOBDS<sup>-1</sup>); crude OR (95% CI) = 17.2 (15 to 20), *P* < 0.001. Methicillin-resistant  
 301 bacteraemia occurred more frequently in ICU or surgical settings, older patients, following MRSA  
 302 colonisation and after prolonged or recent admission. Comparing community with hospital-  
 303 associated bacteraemia there were no significant differences in demographics or rates of previous  
 304 admission in the last 12 months (41% vs. 37%; *P* = 0.10).

305  
 306  
 307 Clinical outcomes:  
 308 Inpatient and 30-day all-cause mortality rates after SAB were 25% and 20% respectively, and  
 309 outcomes were consistently worse than for patients without bacteraemia (table 1). Inpatient  
 310 mortality was over six-times higher than expected in the SAB cohort (SMR, 95% CI 6.4, 5.7 to 7.0).  
 311 Attributable inpatient mortality was 20% (MRSA 31%, MSSA 17%).

312  
 313 Methicillin resistance was associated with longer length-of-stay and increased readmission rates.  
 314 The crude odds ratio for mortality within 30 days of isolation of MRSA versus MSSA was 2.15 (95% CI  
 315 1.50 to 3.08; *p* < 0.001). A final multivariate logistic regression model confirmed age, month of study  
 316 (secular trend) and hospital-associated infection as independent risk-factors for 30-day mortality,  
 317 however after adjustment for these covariates methicillin resistance was not a significant  
 318 determinant – table 2.

319  
 320 **Table 2: Multivariate logistic and Cox regression models of risk factors for 30-day mortality, inpatient mortality and**  
 321 **discharge alive**

|                                         | 30 day mortality <sup>a</sup> |         | Inpatient mortality <sup>b</sup> |         | Discharge alive <sup>c</sup> |         |
|-----------------------------------------|-------------------------------|---------|----------------------------------|---------|------------------------------|---------|
|                                         | OR (95% CI)                   | P value | HR (95% CI)                      | P value | HR (95% CI)                  | P value |
| MRSA                                    | 1.38 (0.93 to 2.06)           | 0.112   | 1.47 (1.09 – 1.98)               | 0.012   | 1.09 (0.89 - 1.33)           | 0.416   |
| Gender (female)                         | 1.41 (0.96 to 2.04)           | 0.075   | 1.18 (0.89-1.58)                 | 0.244   | 1.06 (0.89-1.25)             | 0.536   |
| Age (10 yrs <sup>-1</sup> )             | 1.79 (1.58 to 1.97)           | <0.001  | 1.42 (1.29 - 1.57)               | <0.001  | 0.86 (0.83-0.90)             | <0.001  |
| Hospital associated SAB                 | 1.56 (1.08 to 2.26)           | 0.018   | 2.27 (1.67 to 2.27)              | <0.001  | 1.50 (1.26-1.80)             | <0.001  |
| Secular trend per 3 months              | 0.87 (0.77 to 0.99)           | 0.028   | 0.92 (0.83-1.02)                 | 0.094   | -                            | -       |
| Length of stay (7 days <sup>-1</sup> )* | -                             | -       | 1.02 (1.01 to 1.03)              | <0.001  | 0.98 (0.97-0.98)             | <0.001  |
| ICU admission                           | -                             | -       | -                                | -       | 0.70 (0.59-1.00)             | 0.052   |

322 OR = odds ratio, HR = Hazards Ratio, CI = confidence interval.

323 a Logistic regression for 30-day mortality. This model had good calibration (Hosmer-Lemeshow goodness of fit *p* = 0.93) and  
 324 discrimination (area under receiver operator characteristic curve = 0.77).

325 b Cox (proportional hazards) regression. Model  $\chi^2$  (df) = 115 (6); *P* < 0.001

326 c Cox (proportional hazards) regression. Model  $\chi^2$  (df) = 265 (6); *P* < 0.001

327 \* Entered as a time-dependent covariate.

328  
 329 In a multivariate Cox-regression model, methicillin resistance was associated with a nearly 50%  
 330 increased hazard of inpatient death (table 2), but there was no significant difference in discharge

331 rate in survivors. Age, duration of hospitalisation and hospital-associated infection were  
332 independent predictors of hazard of inpatient death.

333

334 **Secular trends:**

335

336 Trends in *S.aureus* bacteraemia and clinical outcomes:

337

338 Prevalence density of all SAB declined from 0.73/1000 AOBs to 0.50/1000 AOBs (-41%;  $P = 0.002$   
339 for trend) between January 2006 and December 2010, Prevalence density of MRSA bacteraemia fell  
340 73% from 0.26 to 0.07/1000 AOBs ( $P < 0.001$ ) and HA-incidence density 82%, from 0.16 to  
341 0.03/1000 AOBs ( $P < 0.001$ ), however rates of MSSA bacteraemia were unchanged (Figure 3). An  
342 increasing proportion of MRSA bacteraemia was associated with previous colonisation or infection  
343 (table 3). Case-mix within the SAB cohort was otherwise stable.

344

345 30-day mortality after MRSA bacteraemia declined from 37% to 13% ( $P = 0.027$ ) but no significant  
346 change was observed in mortality after MSSA bacteraemia (figure 3). By 2010, 90% of episodes of  
347 bacteraemia and 86% of associated inpatient deaths were attributable to MSSA. These MRSA-  
348 specific declines closely correlated with changes in rates of *all* MRSA or MSSA infection or  
349 colonisation. By admitting department, declines in MRSA prevalence density, HA-incidence density  
350 and mortality were significantly steeper in ICU than medical or surgical departments ( $P < 0.05$  for  
351 interaction term) – figure 3.

352

353 **Table 3: Characteristics of *S. aureus* bacteraemia, associated outcomes and frequencies of all *S.aureus* isolates by year**  
354 **of study: N (%), Mean (SD) or median (IQR).**

|                                                          | Year            |                 |               |                 |                 | p value* |
|----------------------------------------------------------|-----------------|-----------------|---------------|-----------------|-----------------|----------|
|                                                          | 2006<br>n = 218 | 2007<br>n = 188 | 2008<br>n=151 | 2009<br>n = 152 | 2010<br>n = 158 |          |
| <b><i>S.aureus</i> bacteraemia</b>                       |                 |                 |               |                 |                 |          |
| <b>No (%) involving:</b>                                 |                 |                 |               |                 |                 | <0.001   |
| MSSA                                                     | 156 (72%)       | 140 (74%)       | 100 (66%)     | 121 (80%)       | 142 (90%)       |          |
| MRSA                                                     | 62 (28%)        | 48 (26%)        | 51 (34%)      | 31 (20%)        | 16 (10%)        |          |
| <b>Demographics</b>                                      |                 |                 |               |                 |                 |          |
| Gender (female)                                          | 66 (30%)        | 62 (33%)        | 55 (36%)      | 55 (36%)        | 49 (30%)        | 0.603    |
| Age (years)                                              | 57 (22)         | 56 (21)         | 58 (22)       | 56 (22)         | 57 (20)         | 0.744    |
| <b>Clinical characteristics</b>                          |                 |                 |               |                 |                 |          |
| Hospital Associated (%)                                  | 112 (51%)       | 108 (60%)       | 69 (46%)      | 75 (50%)        | 92 (58%)        | 0.750    |
| Previous <i>S.aureus</i> bacteraemia, any (%)            | 10 (5%)         | 18 (10%)        | 19 (13%)      | 14 (10%)        | 12 (8%)         | 0.787    |
| Previous MRSA colonisation or infection (%) <sup>†</sup> | 24 (39%)        | 24 (50%)        | 29 (57%)      | 16 (52%)        | 10 (63%)        | 0.056    |
| Admission within past 12 months (%)                      | 134 (62%)       | 101 (54%)       | 92 (61%)      | 96 (63%)        | 99 (62%)        | 0.503    |
| <b>Outcomes</b>                                          |                 |                 |               |                 |                 |          |
| 30-day mortality                                         | 52 (24%)        | 39 (22%)        | 31 (21%)      | 27 (18%)        | 24 (15%)        | 0.013    |
| In hospital death                                        | 63 (29%)        | 45 (25%)        | 34 (23%)      | 34 (23%)        | 33 (21%)        | 0.045    |
| Length-of-stay (days)                                    | 19 (10-41)      | 17 (7-36)       | 27 (12-36)    | 22 (12-44)      | 19 (12-42)      | 0.508    |
| Readmission ( $\leq 14$ days)                            | 25 (17%)        | 19 (14%)        | 25 (22%)      | 31 (27%)        | 19 (16%)        | 0.291    |
| <b>All <i>S.aureus</i> infection/colonisations</b>       |                 |                 |               |                 |                 |          |

| No. (%) involving: • | <0.001     |            |            |            |            |
|----------------------|------------|------------|------------|------------|------------|
| MSSA                 | 1682 (72%) | 1532 (75%) | 1250 (74%) | 1416 (83%) | 1351 (90%) |
| MRSA                 | 638 (28%)  | 510 (25%)  | 448 (26%)  | 289 (17%)  | 151 (10%)  |

\* Linear and logistic regressions with month of study as sole explanatory variable. † Data presented for MRSA bacteraemia only. CI = Confidence Intervals, MRSA = methicillin-resistant *Staphylococcus aureus*, AOBDS = acute occupied bed days • Data available for adult, non-obstetric patients 2006 to 2010. Counts represent non-duplicate isolates (1 per patient per year).

355

356

357 Trends in inpatient case mix:

358

359 There were no significant trends in admitting speciality, or gender among inpatients over the five  
 360 year period. Mean age of adult and all patients increased between 2006 and 2010 (+1.7, 95% CI: +1.3  
 361 to +2.2 years, for all patients;  $P < 0.001$ ), while mean length-of-stay (-1.3, -1.6 to -1.11 days;  $P <$   
 362 0.001) and weighted average bed occupancy (-2.6%, -4.8% to -0.4%;  $P = 0.021$ ) declined  
 363 (supplemental file 3). Considering the associations noted earlier, these changes represented  
 364 opposing upward (increasing age), and downward (reduced length-of-stay, bed occupancy)  
 365 pressures on rates of bacteraemia. Secular trend in MRSA prevalence density ( $P = 0.03$  for trend) and  
 366 HA-incidence density ( $P = 0.01$ ) remained significant after adjusting for these changes in case-mix in  
 367 a multivariate Poisson regression model.

368

### 369 Impacts of universal MRSA admission screening

370

371

372 Screening adherence and importation pressures:

373

374 43% of all adult, non-obstetric overnight admissions and 84% of eligible patients in high-risk  
 375 environments were screened prior to routine surveillance. During universal surveillance 87% of  
 376 eligible patients were screened ( $n = 86,890$ ). A target of 90% adherence was achieved within four  
 377 months of initiation and sustained thereafter, excluding a special study period in which trial of  
 378 additional throat, perineum and axillae swabs and discharge screening reduced patient participation  
 379 (figure 4).

380

381 MRSA prevalence at admission (importation pressure) steadily declined during the period of  
 382 universal surveillance, averaging 3.1%, with 1.7% known to be previously colonised or infected with  
 383 MRSA. There was an increase in episodes of MRSA bacteraemia preceded by screening at admission  
 384 (95% vs. 81%;  $P = 0.008$ ) and identified as being colonised at admission (56% vs. 38% of all  
 385 bacteraemia;  $P = 0.013$ ; 30% vs. 11% without history of MRSA;  $P = 0.011$ ) after introduction of

386 universal surveillance. Data from all hospitals involved in the pathfinder study demonstrated that  
 387 78% of MRSA positive patients were successfully isolated or cohorted, and 41% received at least 1  
 388 day of decolonisation therapy.[29] Given that less than 11% of admissions to ARI stayed for more  
 389 than the minimum 10 days required to identify MRSA from screening, complete a full course of  
 390 decolonisation and obtain confirmatory swabs, only 4.1% of MRSA positive patient were identified  
 391 as being successfully decolonised during the index admission – table 4.[29]

392

393 Patient characteristics by study period:

394

395 Case-mix remained stable between periods of selective screening and universal admission screening  
 396 – table 4. However, there were significant reductions in bed occupancy, length-of-stay. There was an  
 397 abrupt and permanent decline in use of '4C' and macrolide antibiotics within 3 months of the  
 398 antibiotic stewardship intervention (month 11 of universal screening). Improvements in hand-  
 399 hygiene were suggested by audited compliance but not by consumption of alcohol-based hand-rub.

400

401

**Table 4: Characteristics pre and post-intervention**  
**Characteristics**

|                                                                              | Selective screening only | Universal admission screening |
|------------------------------------------------------------------------------|--------------------------|-------------------------------|
| <b>Admission data</b>                                                        |                          |                               |
| No. of all admissions                                                        | 210,745                  | 209,707                       |
| No. of Acute Occupied bed days (at risk)                                     | 748,569                  | 681,483                       |
| Mean (SD) length of stay in hospital, days                                   | 3.96 (0.23)              | 3.33 (0.51)                   |
| Bed-occupancy (% all available beds occupied)                                | 79%                      | 77%                           |
| <b>Case-mix</b>                                                              |                          |                               |
| Mean (SD) age all patients, years                                            | 45.9 (0.45)              | 47.3 (0.57)                   |
| Mean (SD) age, ICU, medical and surgical adult services, years               | 55.3 (0.41)              | 56.4 (0.56)                   |
| Gender: n (%) of all admissions                                              |                          |                               |
| Female,                                                                      | 122,538 (58%)            | 120,417 (57%)                 |
| Male                                                                         | 88,207 (42%)             | 89,290 (43%)                  |
| Speciality, n (%) of all admissions                                          |                          |                               |
| Surgical                                                                     | 84,216 (40%)             | 89,808 (43%)                  |
| Medical                                                                      | 65,711 (31%)             | 65,098 (31%)                  |
| ICU                                                                          | 3312 (2%)                | 2954 (1%)                     |
| Maternity                                                                    | 31,862 (15%)             | 29,738 (14%)                  |
| Paediatric / neonatal                                                        | 24606 (12%)              | 23,147 (12%)                  |
| <b>MRSA Screening, colonisation and all <i>S.aureus</i> infections</b>       |                          |                               |
| Number (%) of overnight admissions‡ screened for MRSA                        | 43,158 (43%)             | 86,890 (87%)                  |
| Number of overnight admission screened per 1000 AOBDS                        | 58                       | 128                           |
| Number (%) of overnight admissions‡ positive for MRSA                        | 2909 (3.5%)              | 2694 (3.1%)                   |
| Estimated number (%) of MRSA-positive patients isolated/cohorted             | No data                  | 2101 (78%)                    |
| Estimated number (%) of MRSA-positive patients receiving decolonisation      | No data                  | 1105 (41%)                    |
| Estimated (%) of MRSA-positive patients with confirmed eradication           | No data                  | 110 (4.1%)                    |
| <b>Other infection control measures</b>                                      |                          |                               |
| Hand-hygiene (Dispensed alcohol gel in Litres / 1000 AOBDS)†                 | 38.1†                    | 37.2                          |
| Mean (SD) monthly hand-hygiene compliance, % §                               | 60.5% (12.3%)            | 92.9% (3.7%)                  |
| Mean (SD) monthly use of '4C' and macrolide antibiotics (DDD/1000 AOBDS)     | 698 (79.4)               | 416 (107.7)                   |
| Monthly use of '4C' and macrolide antibiotics as % of all antibiotic DDDs, % | 66%                      | 37%                           |
| <b>Clinical burdens from <i>S.aureus</i> bacteraemia</b>                     |                          |                               |
| Prevalent MSSA bacteraemia (n)                                               | 353                      | 306                           |
| Prevalent MRSA bacteraemia (n)                                               | 144                      | 64                            |

|                                                                               |             |             |
|-------------------------------------------------------------------------------|-------------|-------------|
| Hospital-associated incident MRSA bacteraemia (n)                             | 89          | 29          |
| Deaths within 30 days MSSA(n)                                                 | 62          | 48          |
| Deaths within 30 days MRSA(n)                                                 | 51          | 12          |
| <b>Clinical burdens from other <i>S.aureus</i> infections / colonisations</b> |             |             |
| Prevalent MRSA infection (any) or colonisation (% admissions)•                | 1457 (1.0%) | 579 (0.4%)  |
| Prevalence density of any MRSA infection (cases/1000 AOBDS) •                 | 2.25 (0.53) | 0.96 (0.44) |
| Prevalent MSSA infection (any) or colonisation (% admissions)•                | 3932 (2.6%) | 3299 (2.1%) |
| Prevalence density of any MSSA infection (cases/1000 AOBDS) •                 | 5.86 (1.15) | 5.49 (0.89) |

DDD = Daily Defined Doses; AOBDS = Acute Occupied Bed Days; ARI = Aberdeen Royal Infirmary; "4C" antibiotics are Ciprofloxacin (all fluoroquinolones), Cephalosporins, Clindamycin, Co-amoxiclav. † Data available from Apr 2008 only (35 months). \*Data available from January 2007 only (48 months). ‡ Adult, non-obstetric patients only. § Average ward compliance weighted by admissions as assessed by standardised audit methods integrating opportunity and technique from January 2007. • Data available for adult, non-obstetric patients 2006 to 2010. Counts represent non-duplicate isolates (1 per patient per year).

#### Time series intervention analysis:

In multivariate transfer function models, adjusting for changes in other aspects of care and prior trends (table 5 and figure 5), universal screening was associated with a 19% reduction in prevalence density (absolute change, 0.189 to 0.154 (-0.035, 95% CI: -0.049 to -0.021)/ 1000 AOBDS;  $P < 0.001$ ), a 29% reduction in hospital-associated incidence density (0.100 to 0.071 (-0.029, -0.035 to -0.023)/1000 AOBDS;  $P < 0.001$ ) and a 46% fall in 30-day mortality (34% to 18.4% (-15.6%, -24.1 to -7.1%);  $P < 0.001$ ). Using targeted screening as the comparison, during universal screening the number needed to screen (NNS) to avoid one additional episode of MRSA bacteraemia was 1978. Rates of bacteraemia and 30-day mortality were also positively associated with hospital-wide consumption of fluoroquinolone and cephalosporin antibiotics 1-6 months earlier. Assuming an average regimen of 7 DDDs, the number needed to treat (NNT) to cause one additional case of MRSA bacteraemia was 179 for cephalosporins and 204 for fluoroquinolones. Compared to forecasted consumption, reduction in the use of these antibiotics following the '4C' antibiotic stewardship intervention was projected to have reduced prevalence density of MRSA bacteraemia by 0.027 (0.15 to 0.039)/1000 AOBDS. No significant relationships were identified with % Hand-hygiene compliance and effect sizes for screening were comparable across all departments. Final models explained 45-68% of variance and in all models residuals were randomly distributed.

No significant associations were found between universal screening, hand-hygiene, or antibiotic use, and rates of MSSA bacteraemia. The %SAB involving MRSA fell by 52% (from 28.6% to 15.1% (-13.5%, -20% to -7%);  $P = 0.014$ ).

439 **Table 5: Multivariate transfer function models<sup>†</sup> for MRSA bacteraemia taking into account introduction of universal**  
 440 **admission screening and changes in other aspects of care (January 2006 to December 2010)-**  
 441

| Term                                                                                                    | Order <sup>a</sup> | Parameter <sup>b</sup> (SE) | T-ratio | P-value |
|---------------------------------------------------------------------------------------------------------|--------------------|-----------------------------|---------|---------|
| <b>(a) Prevalence density of MRSA bacteraemia (cases per 1000 AOBDS) , R2 = 0.678</b>                   |                    |                             |         |         |
| Universal MRSA admission screening intervention                                                         | 3                  | -0.0346 (0.0071)            | -4.89   | <0.001  |
| Cephalosporin use (DDDs/1000 AOBDS)                                                                     | 6                  | +0.0008 (0.0004)            | 2.03    | 0.046   |
| Fluoroquinolone use (DDDs/1000 AOBDS)                                                                   | 5                  | +0.0007 (0.0002)            | +3.53   | <0.001  |
| MA <sup>c</sup>                                                                                         | 4                  | +0.7602 (0.0932)            | +8.15   | <0.001  |
| AR <sup>d</sup>                                                                                         | 6                  | -0.3100 (0.1309)            | -2.37   | 0.019   |
| <b>(b) Hospital-associated incidence density of MRSA bacteraemia (cases per 1000 AOBDS), R2 = 0.648</b> |                    |                             |         |         |
| Universal MRSA admission screening intervention                                                         | 3                  | -0.0290 (0.0032)            | -8.92   | <0.001  |
| Fluoroquinolone use (DDDs/1000 AOBDS)                                                                   | 5                  | +0.0006 (0.0001)            | 63.93   | <0.001  |
| MA1 <sup>c</sup>                                                                                        | 2                  | +0.5801 (0.1273)            | 4.56    | <0.001  |
| MA2 <sup>c</sup>                                                                                        | 3                  | +0.2960 (0.1384)            | 2.14    | 0.032   |
| MA3 <sup>c</sup>                                                                                        | 5                  | +0.3028 (0.1298)            | 2.33    | 0.014   |
| <b>(c) % SABs involving MRSA (%), R2= 0.504</b>                                                         |                    |                             |         |         |
| Universal MRSA admission screening intervention                                                         | 3                  | -13.490 (3.322)             | -4.06   | <0.001  |
| Fluoroquinolone use (DDDs/1000 AOBDS)                                                                   | 5                  | +0.097 (0.047)              | 2.06    | 0.042   |
| Bed-occupancy, % <sup>e</sup>                                                                           | 2                  | +0.201 (0.094)              | 2.14    | 0.032   |
| MA <sup>c</sup>                                                                                         | 9                  | -0.519 (0.115)              | -4.51   | <0.001  |
| <b>(d) 30-day mortality (%) after MRSA bacteraemia, R2 = 0.448</b>                                      |                    |                             |         |         |
| Universal MRSA admission screening intervention                                                         | 0                  | -15.615 (4.349)             | -3.59   | <0.001  |
| Fluoroquinolone use (DDDs/1000 AOBDS)                                                                   | 1                  | +0.222 (0.023)              | 9.54    | <0.001  |
| MA <sup>c</sup>                                                                                         | 8                  | -0.306 (0.108)              | -2.85   | 0.005   |

442 <sup>†</sup>All series stationary before model identification.

443 <sup>a</sup> Delay necessary to observe the effect (in months).

444 <sup>b</sup> Size and direction of effect.

445 <sup>c</sup> MA, moving average term representing abrupt changes in bacteraemia rates or mortality in immediate future.

446 <sup>d</sup> AR, autoregressive term representing past values of bacteraemia rates or mortality.

447 <sup>e</sup> % Bed occupancy, average bed-occupancy weighted by admitting department, by month.

442  
443  
444  
445  
446  
447  
448  
449  
450  
451  
452  
453  
454  
455  
456  
457  
458  
459  
460  
461  
462  
463  
464  
465  
466  
467  
468



1  
2  
3 469 **Discussion**

4 470

5  
6 471 This retrospective cohort study identified a 41% decrease in prevalence density of all *S.aureus*  
7  
8 472 bacteraemia in an inpatient population from Scotland between 2006 and 2010. Secular trends were  
9  
10 473 attributable to steep reductions in MRSA bacteraemia. Introduction of a universal MRSA admission  
11  
12 474 screening programme was associated with significant reductions in rates of MRSA bacteraemia and  
13  
14 475 associated early mortality, whilst having no discernible impact on burdens from MSSA bacteraemia.  
15  
16 476 Ecological and temporal associations between MRSA bacteraemia and use of fluoroquinolones and  
17  
18 477 cephalosporins suggested that a subsequent antibiotic stewardship programme limiting use of these  
19  
20 478 agents also contributed to control of MRSA blood-stream infections.

21 479

22 480 **Strengths and limitations**

23  
24 481 Analyses of risk-factors for SAB acquisition and outcomes were limited by a lack of information on  
25  
26 482 comorbidities, severity of sepsis, source control and clinical management.[4,13,41] However, age has  
27  
28 483 been shown to be an appropriate proxy for co-morbidity and risk of death,[13] and our estimates of  
29  
30 484 attributable mortality approximate those in more detailed analyses.[4] The effect of MRSA on risk of  
31  
32 485 30-day mortality approximated estimates from a previous meta-analysis [17] and non-significance  
33  
34 486 may be explained by a limited sample size.

35 487

36  
37 488 Changes in strain distribution have been linked to secular trends in invasive *S.aureus*  
38  
39 489 infections,[6,10,21] with declines in epidemic strains predating decreases in MRSA in the UK.[10]  
40  
41 490 Reflecting national data,[10] regional studies of MRSA infections from the same period identified  
42  
43 491 significant increase in EMRSA-15, with a reciprocal decline in EMRSA-16.[42,43] Trends in strain may  
44  
45 492 have confounded, or mediated, the associations between infection control measures and SAB  
46  
47 493 epidemiology. [10]

48 494

49  
50 495 Universal MRSA admission screening was introduced as part of an NHS Scotland pathfinder project,  
51  
52 496 precluding the use of cross-over, or controlled, trial designs as elsewhere.[40,41] Data on isolation-  
53  
54 497 days captured – suggested as a measure of surveillance effectiveness,[42] were also not available.  
55  
56 498 We attempted to minimise threats to internal validity common to quasi-experimental studies of  
57  
58 499 infection control measures.[22,38] A definition of bacteraemia based on blood isolates rather than  
59  
60 500 clinical suspicion made the study less vulnerable to detection bias whilst follow-up to a minimum of  
501  
502 501 two weeks post-discharge prevented attrition bias arising for changes in length of stay. An attempt  
503  
504 502 to identify and prevent selection and performance bias was made by identifying and controlling for,  
505  
506 503 changes in case-mix, importation pressure,[44] and other aspects of care,[22] before and after the

1  
2  
3 504 intervention. Investigation of concurrent trends in MSSA bacteraemia provided some control for  
4 505 impacts of general improvements in infection control or clinical management, and supports an  
5 506 independent effect of screening on MRSA bacteraemia.[34 38] ARIMA techniques, account for non-  
6 507 independence of parameters and stochastic elements in time-series. This is convergent with  
7 508 understanding of the spread of resistance and infectious disease within populations,[38] and  
8 509 minimises the potential for regression to the mean to account for trends.

9 510

10 511 Transfer function models including screening, antibiotic use and bed-occupancy accounted for 45-  
11 512 68% of variation in rates of bacteraemia, suggesting unmeasured factors affecting rates. Universal  
12 513 screening was one of several sequentially implemented control measures for MRSA in North East  
13 514 Scotland, including introduction of environmental swabbing and disinfection (2001), alcohol hand gel  
14 515 (2002) and targeted admission screening (2003). The lack of accurate data on alcohol-based hand-gel  
15 516 consumption, and limited baseline data before the national hand-hygiene campaign may explain a  
16 517 failure to identify significant effects of hand-improving hand-hygiene [33] as described in other time-  
17 518 series analysis [34,35]. Introduction of screening was likely to be associated with improved  
18 519 awareness amongst healthcare workers and the public around MRSA, with potential improvements  
19 520 in adherence to general infection control policy. Performance in infection control may also have  
20 521 been influenced by internal audit of MRSA screening. However, non-declining trends in MSSA  
21 522 suggested general infection control measures were an inadequate explanation for MRSA-specific  
22 523 declines.

23 524

24 525 Rates of MRSA colonisation, infection and bacteraemia, and effect sizes from intervention in the  
25 526 present study are comparable to those described in previous investigations of universal surveillance.  
26 527 [28,44-46] Findings may be generalisable to other large public hospitals with intensive care units in  
27 528 high-income countries, with endemic MRSA and relatively low rates of MRSA infection.

28 529

### 29 530 **Comparison to literature:**

30 531 We identified a number of risk-factors for developing *S.aureus* bacteraemia and associated early  
31 532 mortality consistent with previous findings, including; older age,[3,4,13] recent or prolonged  
32 533 hospitalisation,[3,41] prior history of colonisation or infection,[45 47] colonisation on  
33 534 admission,[47,48] and ICU admission.[9] Associations were significantly stronger for MRSA  
34 535 bacteraemia.[48] Despite two meta-analyses suggesting an excess mortality in MRSA, compared to  
35 536 MSSA bacteraemia,[15,17] there remains considerable debate about the importance of methicillin  
36 537 resistance to outcomes.[4,13,18] Our findings suggest that much of the increase in mortality

1  
2  
3 538 associated with methicillin resistance may be explained by infection of more vulnerable patients,[13-  
4 539 18] often in the context of extended contact with healthcare.[15,41]

5  
6 540

7  
8 541 Reflecting the findings of an earlier study from Oxfordshire, which found that MRSA-related disease  
9 542 was responsible for increasing rates of SAB between 1997 and 2003,[3] our findings suggest that  
10 543 subsequent declines have occurred, almost exclusively in MRSA-related disease. An equivalent  
11 544 upward pressure on MSSA rates has not been observed, consistent with observations that MRSA  
12 545 appears to add to, rather than displace MSSA infection.[21] These findings match experience across  
13 546 the UK.[8]

14  
15  
16 547

17  
18  
19 548 Evidence on the role of universal screening in reducing all MRSA infections, is conflicting.[28,30,44-  
20 549 50] and benefits may depend on target population, screening technology and subsequent control  
21 550 interventions.[47] A recent US study of routine surveillance for MRSA noted a significant downward  
22 551 trend in MRSA bacteraemia in ICU but not in other hospital settings.[28] A second US study found a  
23 552 decrease in hospital-wide MRSA but not MSSA bacteraemia during universal screening.[46] In  
24 553 agreement with these studies, we found that rates of MRSA bacteraemia declined in parallel with all  
25 554 MRSA infections,[51] and there was no reciprocal rise in hospital-wide MSSA bacteraemia or  
26 555 infections.[48] Hospital-wide reductions in bacteraemia, of similar magnitude to that seen in our  
27 556 study, were reported following introduction of screening in intensive care[27] or high-risk patients  
28 557 only.[26] However, we identified additional declines in both general and intensive care settings,  
29 558 despite a baseline scenario involving routine screening in high-risk patients. These findings also  
30 559 contrast with those from a one-year review of the pathfinder study which found that although  
31 560 declines in all MRSA infections/colonisations were greater in intervention than control hospitals  
32 561 during universal screening the difference was non-significant.[52] We note this comparison was  
33 562 limited by low numbers in control hospitals, risks of contamination where control hospitals were in  
34 563 the same NHS board, a short baseline and follow-up period, and methods not accounting for non-  
35 564 independence of observations in time-series and lagged effects.

36  
37 565

38  
39  
40 566 We are not aware of a previous time-series analysis describing significant impacts of universal  
41 567 screening on % mortality following SAB. A lack of improvement in mortality after MSSA bacteraemia  
42 568 did not suggest general improvements in care. The increased proportion of bacteraemia in those  
43 569 without history of MRSA identified as positive for MRSA at admission during universal screening may  
44 570 have facilitated prompt initiation of appropriate therapy. Other potential explanations include  
45 571 increased awareness of invasive MRSA infection in clinical staff with routine screening, greater

1  
2  
3 572 marginal benefits of universal admission screening in ICU settings,[27,28] and changes in strain  
4 573 distribution.[42,43]

5  
6 574

7  
8 575 Our findings suggest additional considerations in assessing utility of universal surveillance. Patients  
9 576 colonised at admission were at high risk of developing hospital-associated MRSA bacteraemia and  
10 577 early identification of colonised patients provides opportunities to reduce invasive infection by  
11 578 decolonisation.[27] As elsewhere,[27] declines in hospital-associated infection were steeper than  
12 579 those in rates including community-associated infection, coherent with reductions in transmission.  
13 580 Similarly, decline in importation pressure during universal surveillance suggested interruption of  
14 581 connections between prevalence of MRSA in hospital and community populations, focused in  
15 582 frequently admitted patients.[53-55] However, approximately 50% of hospital-associated MRSA  
16 583 bacteraemia occurred in patients not colonised at admission highlighting the limitations in admission  
17 584 surveillance and the persistence of cross-transmission . [56] Other lost opportunities to prevent  
18 585 transmission may arise in practice given the respective 22% and 59% of MRSA positive patients not  
19 586 isolated or receiving any decolonisation therapy during the pathfinder study. The latter is particularly  
20 587 concerning as effective decolonisation may be a pre-requisite for cost-effectiveness of universal  
21 588 screening.[57]

22  
23 589

24 590 As in previous studies from the region, [31,33,43] we noted the importance of antibiotic use in  
25 591 hospital in determining rates of all MRSA infections in the region. Although both patient-level [37]  
26 592 and ecological associations [35] between fluoroquinolone and cephalosporin use and MRSA  
27 593 infection have been identified, we are not aware of an experimental or quasi-experimental study  
28 594 investigating impacts of limiting their use in the control of MRSA bacteraemia specifically.  
29 595 Independent effects of screening and antibiotic stewardship were of comparable magnitude  
30 596 suggesting complementary roles in the control of both invasive and other MRSA infections.[36]

31  
32 597

### 33 598 **Implications for practice, policy and research**

34 599 Our study suggests that universal admission screening for MRSA may have an important effect on  
35 600 rates of MRSA bacteraemia, and associated mortality, beyond selective screening of high-risk  
36 601 patients. However, there remains debate around the cost-effectiveness of universal surveillance in  
37 602 comparison to alternative control measures,[49,57-61] risks of chlorhexidine resistance with  
38 603 widespread decolonisation,[11] and opportunity costs or unintended harms associated with  
39 604 isolation.[61] Subsequent to the pathfinder study, NHS Scotland has suggested hospital-wide  
40 605 targeted surveillance based on clinical risk-assessment as a minimum standard.[63] This is

1  
2  
3 606 convergent with an emerging consensus that admission screening based on clinical prediction rules  
4 607 may offer a more efficient and pragmatic approach outside of populations with high-prevalence of  
5 608 MRSA.[47,61,64] Our findings suggest the need to consider the greater marginal benefits in  
6 609 preventing bacteraemia and associated mortality which impose disproportional healthcare and  
7 610 wider societal costs.[65] Considered alongside subsequent experience of low adherence to clinical  
8 611 risk assessment based screening in *NHS Grampian* we suggest the need to re-evaluate the benefits  
9 612 of universal screening in Scotland. Irrespective of the chosen strategy, as the additional effects of  
10 613 antibiotic stewardship in this study and effects of bed-occupancy suggest, benefits of admission  
11 614 screening will be optimised where integrated with a broader package of infection prevention and  
12 615 control measures.[28,47,56]  
13  
14  
15  
16  
17  
18  
19

20 616  
21 617 The concentration of both MRSA and MSSA blood stream infections in susceptible patient groups  
22 618 with higher levels of healthcare contact suggests some measures successfully limiting invasive MRSA  
23 619 infections may be generalizable to control of all SAB. A more rigorous approach to identify and limit  
24 620 iatrogenic sources of bacteraemia, including peripheral or central catheters,[41,44,65] is required.  
25 621 Screening for MSSA with isolation and decolonisation has been suggested for selected, high-risk  
26 622 patients.[67]  
27  
28  
29  
30  
31

32 623  
32 624 Equally, strategies are required that account for the distinct epidemiology of MSSA and MRSA  
33 625 bacteraemia. In contrast to MRSA, the majority of MSSA bacteraemia in this study were community  
34 626 associated and occurred in younger patients. Targeted measures are required to prevent invasive  
35 627 infection in at-risk groups including IV drug users,[41,68] surgical, diabetic and renal patients.[67,69]  
36  
37  
38  
39

40 628  
40 629 Given the role of social and risk-networks in sustaining *S.aureus* transmission,[64 67] broadening  
41 630 control of SAB to the community is likely to require the commitment of multiple agencies and  
42 631 healthcare providers.  
43  
44  
45

46 632  
46 633 Changes in virulence of MSSA and MRSA may account for divergence in trends in outcomes.[13]  
47 634 Genetic sequencing or typing could be used to quantify the contribution of clonal expansion to  
48 635 recent trends in SAB epidemiology. A recent multicentre study found large variation in management  
49 636 of SAB in the UK and called for high-level evidence to define optimal care.[41] Future research and  
50 637 guidelines should consider both MSSA and MRSA bacteraemia.  
51  
52  
53  
54

55 638  
56  
57  
58  
59  
60

1  
2  
3 639 In summary, this study described decreasing trends in *S. aureus* bacteraemia following a decade of  
4 640 infection control policies focusing on MRSA. Expansion from targeted to universal MRSA admission  
5 641 screening was associated with important reductions in MRSA bacteraemia, when combined with  
6 642 isolation and decolonisation. However, findings also highlighted the need for strategies to reduce  
7 643 clinical burdens from invasive MSSA infection if progress towards national targets for SAB is to be  
8 644 sustained.[21]  
9  
10  
11  
12  
13  
14  
15  
16  
17  
18  
19  
20  
21  
22  
23  
24  
25  
26  
27  
28  
29  
30  
31  
32  
33  
34  
35  
36  
37  
38  
39  
40  
41  
42  
43  
44  
45  
46  
47  
48  
49  
50  
51  
52  
53  
54  
55  
56  
57  
58  
59  
60

1  
2  
3 672 **Acknowledgements:** The authors would like to thank all the staff in the routine microbiology  
4 673 diagnostic lab and all the clinical staff at Aberdeen Royal Infirmary, whose work made this possible.  
5  
6 674 We are grateful to Richard Slessor and the health intelligence services, Aberdeen for providing data  
7  
8 675 on admissions. We would also like to thank Health Protection Scotland for help in the  
9  
10 676 implementation of the pathfinder project.  
11

677

12 678 **Contributors:** BE and IMG conceived this study. The statistical analysis was performed by TL and  
13  
14 679 JMLL. All authors assisted in drafting the manuscript. Ian M Gould is the guarantor for this study.  
15

680

16  
17 681 **Funding:** The NHS pathfinder study on universal admission screening was funded by the Scottish  
18  
19 682 Government Health Directorate. This research received no specific grant from any funding agency in  
20  
21 683 the public, commercial or not-for-profit sectors  
22

684

23  
24 685 **Competing Interests:** All authors have completed the Unified Competing Interest form at  
25  
26 686 [www.icmje.org/coi\\_disclosure.pdf](http://www.icmje.org/coi_disclosure.pdf) (available on request from the corresponding author) and declare  
27  
28 687 no support from any organisation for the submitted work. IM Gould has received personal and grant  
29  
30 688 financial support from companies manufacturing diagnostics and therapeutics for MRSA. B Edwards  
31  
32 689 has received grant financial support from Novartis. T Lawes and JM López-Lozano have no conflicts  
33  
34 690 to declare. TL BE JMLL IMG know of no other relationships or activities that could appear to have  
35  
36 691 influenced the submitted work.  
37

692

38 693 **Ethical approval:** Ethics approval was not required.

39 694 Authors' note: This study used anonymised and routinely collected data from laboratory systems,  
40  
41 695 infection control, pharmacy, and health intelligence departments. Patient-orientated information on  
42  
43 696 MRSA screening, and NHS Grampian's participation in a national pathfinder project, was made  
44  
45 697 widely available in Aberdeen Royal Infirmary. This information included a statement that patient  
46  
47 698 information would be held in the strictest confidence and used only for stated purposes of informing  
48  
49 700 the NHS about the value of a national screening programme, in accordance with the Data Protection  
50  
51 701 Act 1998. The authors hold that extraction of data for the purposes of this study did not impose any  
52  
53 702 predictable additional burdens on patients at ARI and its use was justified by foreseeable benefits to  
54  
55 703 the patient populations in the NHS and the general public. The authors believe that the present  
56  
57 704 study was conducted in accordance with the Declaration of Helsinki 1964.  
58

705

59 706 **Data sharing:** Technical appendix and data available on request from the corresponding author.  
60

1  
2  
3  
4  
5  
6  
7  
8  
9  
10  
11  
12  
13  
14  
15  
16  
17  
18  
19  
20  
21  
22  
23  
24  
25  
26  
27  
28  
29  
30  
31  
32  
33  
34  
35  
36  
37  
38  
39  
40  
41  
42  
43  
44  
45  
46  
47  
48  
49  
50  
51  
52  
53  
54  
55  
56  
57  
58  
59  
60**References:**

- 707  
708  
709 1. Allegranzi B, Bagheri Nejad S, et al. Burden of endemic health-care-associated infection in developing  
710 countries: systematic review and meta-analysis. *Lancet* 2011;377(9761):228-41.  
711  
712
- 713 2. Wilson J, Elgohari S, Livermore DM, et al. Trends among pathogens reported as causing bacteraemia in  
714 England, 2004-2008. *Clin Microbiol Infect* 2011;17(3):451-8.  
715  
716
- 717 3. Wyllie DH, Crook DW, Peto TEA. Mortality after *Staphylococcus aureus* bacteraemia in two hospitals in  
718 Oxfordshire, 1997-2003: cohort study. *BMJ* 2006; 333: 281-6.  
719  
720
- 721 4. Blot SI, Vandewoude KH, Hoste EA, et al. Outcome and attributable mortality in critically ill patients with  
722 bacteraemia involving methicillin-susceptible and methicillin-resistant *Staphylococcus aureus*. *Arch Intern Med*  
723 2002;162(19):2229-35.  
724  
725
- 726 5. de Kraker MEA, Davey PG, Grundmann H; on behalf of the BURDEN study group. Mortality and Hospital Stay  
727 Associated with Resistant *Staphylococcus aureus* and *Escherichia coli* Bacteraemia: Estimating the Burden of  
728 Antibiotic Resistance in Europe. *PLoS Med*, 2011; 8(10): e1001104.  
729  
730
- 731 6. Johnson AP, Pearson A, Duckworth G. Surveillance and epidemiology of MRSA bacteraemia in the UK. *J*  
732 *Antimicrob Chemother*. 2005;56(3):455-62.  
733  
734
- 735 7. Clements A, Halton K, Graves N, et al. Overcrowding and understaffing in modern health-care systems: key  
736 determinants in methicillin-resistant *Staphylococcus aureus* transmission. *Lancet Infect Dis* 2008;8(7):427-34.  
737  
738
- 739 8. Pearson A, Chronias A, Murray M: Voluntary and mandatory surveillance for methicillin-resistant  
740 *Staphylococcus aureus* (MRSA) and methicillin-susceptible *S. aureus* (MSSA) bacteraemia in England. *J*  
741 *Antimicrob Chemother*. 2009; 64 Suppl 1:i11-7.  
742  
743
- 744 9. Edgeworth JD. Has decolonization played a central role in the decline in UK methicillin-resistant  
745 *Staphylococcus aureus* transmission? A focus on evidence from intensive care. *J Antimicrob Chemother*.  
746 2011;66 Suppl 2:ii41-7.  
747  
748
- 749 10. Wyllie D, Paul J, Crook D. Waves of trouble: MRSA strain dynamics and assessment of the impact of  
750 infection control. *J Antimicrob Chemother* 2011;66(12):2685-8  
751  
752
- 753 11. Health Protection Agency. Voluntary reporting of *Staphylococcus aureus* bacteraemia in England, Wales  
754 and Northern Ireland, 2010. London: Health Protection Agency; 2011.  
755  
756
- 757 12. Health Protection Scotland. SNBTS Annual Infection Control Report: April 2010 to March 2011. Edinburgh:  
758 Health Protection Scotland; 2011.  
759  
760



- 1  
2  
3 761 13. Shurland S, Zhan M, Bradham DD, et al. Comparison of Mortality Risk Associated With Bacteremia Due to  
4 762 Methicillin-Resistant and Methicillin-Susceptible *Staphylococcus aureus*. *Infection Control and Hospital*  
5 763 *Epidemiology* 2007; 28 (3): 273-9.  
6 764  
7 765  
8 766 14. Wang JL, Chen SY, Wang JT, et al. Comparison of both clinical features and mortality risk associated with  
9 767 bacteremia due to community-acquired methicillin-resistant *Staphylococcus aureus* and methicillin-susceptible  
10 768 *S. aureus*. *Clin Infect Dis* 2008;46(6):799-806.  
11 769  
12 770  
13 771 15. Whitby M, McLaws M-L, Berry G. Risk of death from methicillin-resistant *Staphylococcus aureus*  
14 772 bacteraemia: a meta-analysis. *Med J Aust* 2001;175:264-7.  
15 773  
16 774  
17 775 16. Wolkewitz M, Frank U, Philips G, et al: Mortality associated with in-hospital bacteraemia caused by  
18 776 *Staphylococcus aureus*: a multistate analysis with follow-up beyond hospital discharge; *J antimicrob*  
19 777 *chemother*, 2011; 66: 381-386.  
20 778  
21 779  
22 780 17. Cosgrove SE, Sakoulas G, Perencevich EN, et al. Comparison of mortality associated with methicillin-  
23 781 resistant and methicillin-susceptible *Staphylococcus aureus* bacteraemia: a meta-analysis. *Clin Infect Dis* 2003;  
24 782 36: 53-9.  
25 783  
26 784  
27 785 18. Cosgrove SE, Qi Y, Kaye KS, et al. The Impact of Methicillin Resistance in *Staphylococcus aureus*  
28 786 Bacteraemia on Patient Outcomes: Mortality, Length of Stay, and Hospital Charges. *Infection Control and*  
29 787 *Hospital Epidemiology*; 26(2): 166-174.  
30 788  
31 789  
32 790 19. NHS Scotland. HEAT Targets due for delivery in 2009/10: Summary of performance. Edinburgh: NHS  
33 791 Scotland Performance and Business Management;2011.  
34 792  
35 793  
36 794 20. Paul J. Surveillance and management of all types of *Staphylococcus aureus* bacteraemia [editorial]. *BMJ*  
37 795 2006; 333: 269.  
38 796  
39 797  
40 798 21. Mostofsky E, Lipsitch M and Regev-Yochay G. Is methicillin-resistant *Staphylococcus aureus* replacing  
41 799 methicillin-susceptible *S.aureus*? *J Antimicrob Chemother* 2011; 66: 2199-2214.  
42 800  
43 801  
44 802 22. Cooper BS, Stone SP, Kibbler CC, et al. Systematic review of isolation measures in the hospital management  
45 803 of methicillin resistant *Staphylococcus aureus*: a review of the literature with epidemiological and economic  
46 804 modelling. *Health Technol Assess*. 2003;7(39):191-4  
47 805  
48 806  
49 807 23. Wilcox MH. Screening for MRSA. *BMJ* 2008;336(7650):899-900.  
50 808  
51 809  
52 810 24. Loeb M, Main C, Walker-Dilks C, et al. Antimicrobial drugs for treating methicillin-resistant *Staphylococcus*  
53 811 *aureus* colonization. *Cochrane Database Syst Rev* 2003;(4): CD003340.  
54 812  
55 813  
56 814 25. McGinagle KL, Gourlay ML, Buchanan IB. The use of active surveillance cultures in adult intensive care units  
57 815 to reduce methicillin-resistant *Staphylococcus aureus*-related morbidity, mortality, and costs: a systematic  
58 816 review. *Clin Infect Dis* 2008;46(11):1717-25.  
59 817  
60

- 1  
2  
3 818 26. Clancy M, Graepler A, Wilson M, Douglas I, Johnson J, Price CS. Active screening in high-risk units is an  
4 819 effective and cost-avoidant method to reduce the rate of methicillin-resistant *Staphylococcus aureus* infection  
5 820 in the hospital. *Infect Control Hosp Epidemiol*. 2006;27(10):1009-17.  
6 821  
7 822  
8 823 27. Huang SS, Yokoe DS, Hinrichsen VL, et al. Impact of routine intensive care unit surveillance cultures and  
9 824 resultant barrier precautions on hospital-wide methicillin-resistant *Staphylococcus aureus* bacteremia. *Clin*  
10 825 *Infect Dis*, 2006;43(8):971-8.  
11 826  
12 827  
13 828 28. Jain R, Kralovic SM, Evans ME, et al. Veterans Affairs initiative to prevent methicillin-resistant  
14 829 *Staphylococcus aureus* infections. *N Engl J Med*. 2011; 364(15):1419-30.  
15 830  
16 831  
17 832 29. Reilly JS, Stewart S, Christie P, et al. Universal screening for methicillin resistant *Staphylococcus aureus*:  
18 833 interim results from the NHS Scotland pathfinder project. *J of hospital Infection* 2010;74:35-41.  
19 834  
20 835  
21 836 30. Health Protection Scotland; National Services Scotland. NHS Scotland MRSA Screening Pathfinder  
22 837 Programme Final Report Volume 1: An investigation of the Clinical Effectiveness of MRSA Screening [Report].  
23 838 Glasgow: Health Protection Scotland; Feb 2011.  
24 839  
25 840  
26 841 31. Stone SP, Cooper BS, Kibbler, CC, et al. The ORION statement: guidelines for transparent reporting of  
27 842 outbreak reports and intervention studies of nosocomial infection. *Lancet Infect Dis* 2007; 7: 282-288.  
28 843  
29 844  
30 845 32. Chen YC, Sheng WH, Wang JT, et al. Effectiveness and limitations of hand hygiene promotion on decreasing  
31 846 healthcare-associated infections. *PLoS One*. 2011;6(11):e27163.  
32 847  
33 848  
34 849 33. Sroka S, Gastmeier P, Meyer E. Impact of alcohol hand-rub use on methicillin-resistant *Staphylococcus*  
35 850 *aureus*: an analysis of the literature. *J Hosp Infect*. 2010;74(3):204-11.  
36 851  
37 852  
38 853 34. Kaier K, Hagist C, Frank U, et al. Two time-series analyses of the impact of antibiotic consumption and  
39 854 alcohol-based hand disinfection on the incidences of nosocomial methicillin-resistant *Staphylococcus aureus*  
40 855 infection and *Clostridium difficile* infection. *Infect Control Hosp Epidemiol*. 2009;30(4):346-53.  
41 856  
42 857  
43 858 35. Aldeyab MA, Monnet DL, López-Lozano JM et al. Modelling the impact of antibiotic use and infection  
44 859 control practices on the incidence of hospital-acquired methicillin-resistant *Staphylococcus aureus*: a time-  
45 860 series analysis. *J Antimicrob Chemother*. 2008;62(3):593-600.  
46 861  
47 862  
48 863 36. Monnet DL, Mackenzie FJ, Lopez-Lozano J-M, et al. Antimicrobial drug use and methicillin-resistant  
49 864 *Staphylococcus aureus*, Aberdeen, 1996-2000. *Emerg Infect Dis*. 2004;10:1432-41.  
50 865  
51 866  
52 867 37. Tacconelli E, De Angelis G, Cataldo MA, et al. Does antibiotic exposure increase the risk of methicillin-  
53 868 resistant *Staphylococcus aureus* (MRSA) isolation? A systematic review and meta-analysis. *Journal of*  
54 869 *Antimicrobial Chemotherapy*, 2008; 61: 26-38.  
55 870  
56 871  
57 872 38. Shardell M, Harris AD, El-Kamary SS, et al. Statistical analysis and application of quasi experiments to  
58 873 antimicrobial resistance intervention studies. *Clin Infect Dis*. 2007;45(7):901-7.  
59 874  
60

- 1  
2  
3 875  
4 876 39. Pakratz A. Forecasting with Dynamic regression Models. New York (NY): Wiley; 1991.  
5 877  
6 878  
7 879 40. Liu L-M, Hudak GB: Forecasting and time series analysis using the SCA statistical system. Chicago (IL):  
8 880 Scientific Computing Associates; 1994.  
9 881  
10 882  
11 883 41. Thwaites GE; United Kingdom Clinical Infection Research Group (UKCIRG). The management of  
12 884 *Staphylococcus aureus* bacteraemia in the United Kingdom and Vietnam: A multi-centre evaluation. *PLoS ONE*  
13 885 2010;5(12):e14170.  
14 886  
15 887  
16 888 42. Edwards B, Milne K, Lawes T, et al. Is Vancomycin MIC 'creep' method dependent? Analysis of methicillin-  
17 889 resistant *S. aureus* (MRSA) susceptibility trends in blood isolates from North East Scotland, 2006-10. *J Clin*  
18 890 *Microbiol.* 2012;50(2):318-25  
19 891  
20 892  
21 893 43. Hunt AC, Edwards B, Girvan EK, et al. Methicillin-resistant *Staphylococcus aureus* in northeastern Scotland  
22 894 in 2003 to 2007: evolving strain distribution and resistance patterns. *J Clin Microbiol* 2011; 49: 1975-8.  
23 895  
24 896  
25 897 44. Jeyaratnam D, Whitty CJM, Phillips K, et al. Impact of rapid screening tests on acquisition of methicillin  
26 898 resistant *Staphylococcus aureus*: cluster randomised crossover trial. *BMJ* 2008;336: 927-30.  
27 899  
28 900  
29 901 45. Harbarth S, Fankhauser C, Schrenzel J, et al: Universal screening for methicillin resistant *Staphylococcus*  
30 902 *aureus* at hospital admission and nosocomial infection in surgical patients. *JAMA* 2008; 299:1149-57.  
31 903  
32 904  
33 905 46. Robicsek A, Beaumont JL, Paule SM, et al. Universal surveillance for methicillin-resistant *Staphylococcus*  
34 906 *aureus* in 3 affiliated hospitals. *Ann Intern Med.* 2008;148(6):409-18.  
35 907  
36 908 47. Seybold U, Schubert S, Bogner JR, et al. *Staphylococcus aureus* infection following nasal colonisation: an  
37 909 approach to rapid risk stratification in a university healthcare system. *J Hosp Infect* 2011; 79(4): 297-301.  
38 910  
39 911  
40 912 46. Honda H, Krauss MJ, Coopersmith CM, et al: *Staphylococcus aureus* nasal colonization and subsequent  
41 913 infection in intensive care unit patients: does methicillin resistance matter? *Infect Control Hosp Epidemiol*  
42 914 2010;31(6):584-91.  
43 915  
44 916  
45 917 47. Harbarth S, Hawkey PM, Tenover F, et al. Update on screening and clinical diagnosis of methicillin-resistant  
46 918 *Staphylococcus aureus* (MRSA). *Int J Antimicrob Agents.* 2011;37(2):110-7  
47 919  
48 920  
49 921 48. Hacek DM, Paule SM, Thomson RB, et al. Implementation of a Universal Admission Surveillance and  
50 922 Decolonisation Program for Methicillin-Resistant *Staphylococcus aureus* (MRSA) reduces the number of MRSA  
51 923 and total number of *S. aureus* isolates reported by the clinical laboratory. *J Clin Microbiol* 2009;47(11):3749-52.  
52 924  
53 925  
54 926 49. Leonhardt KK, Yakusheva O, Phelan D, et al. Clinical effectiveness and cost benefit of universal versus  
55 927 targeted methicillin-resistant *Staphylococcus aureus* screening upon admission in hospitals. *Infect Control Hosp*  
56 928 *Epidemiol* 2011;32(8):797-803.  
57 929  
58 930  
59  
60

- 1  
2  
3 931 50. Hardy K, Price C, Szczepura A, et al. Reduction in the rate of methicillin-resistant *Staphylococcus aureus*  
4 932 acquisition in surgical wards by rapid screening for colonization: a prospective, cross-over study. *Clin Microbiol*  
5 933 *Infect* 2009; 16:333-339.  
6 934  
7 935  
8 936 51. Walker S, Peto TEA, O'Conner L, et al. Are there better methods of monitoring MRSA control than  
9 937 bacteraemia surveillance? An observational database study. *PLoS ONE* 2008;3:e2378.  
10 938  
11 939  
12 940 52. Reilly JS, Stewart S, Christie P et al. Universal screening for methicillin-resistant *Staphylococcus aureus* in  
13 941 acute care: risk factors and outcome from a multicentre study. *J Hosp Infect.* 2012;80(1):31-5.  
14 942  
15 943  
16 944 53. MacKenzie FM, Lopez-Lozano JM, Monnet DL, et al. Temporal relationship between prevalence of  
17 945 methicillin-resistant *Staphylococcus aureus* (MRSA) in one hospital and prevalence of MRSA in the surrounding  
18 946 community: a time-series analysis. *J Hosp Infect* 2007;67(3):225-31.  
19 947  
20 948  
21 949 54. Salgado CD, Farr BM, Calfee DP. Community-acquired methicillin-resistant *Staphylococcus aureus*: a meta-  
22 950 analysis of prevalence and risk factors. *Clin Infect Dis* 2003;36: 131-139.  
23 951  
24 952  
25 953 55. Wyllie DH, Peto TEA, Crook D. MRSA bacteraemia in patients on arrival in hospital: a cohort study in  
26 954 Oxfordshire 1997-2003. *BMJ* 2005;331(7523):992-7.  
27 955  
28 956  
29 957 56. van Velzen EV, Reilly JS, Kavanagh K, et al. A retrospective cohort study into acquisition of MRSA and  
30 958 associated risk factors after implementation of universal screening in Scottish hospitals. *Infect Control Hosp*  
31 959 *Epidemiol.* 2011;32(9):889-96.  
32 960  
33 961  
34 962 57. Robotham JV, Graves N, Cookson BD, et al. Screening, isolation, and decolonisation strategies in the control  
35 963 of methicillin resistant *Staphylococcus aureus* in intensive care units: cost effectiveness evaluation. *BMJ*  
36 964 2011;343:d5694.  
37 965  
38 966 58. Murthy A, De Angelis G, Pittet D, et al. Cost-effectiveness of universal MRSA screening on admission to  
39 967 surgery. *Clin Microbiol Infect.* 2010;16(12):1747-53.  
40 968  
41 969  
42 970 59. Hubben G, Bootsma M, Luteijn M, et al. Modelling the costs and effects of selective and universal hospital  
43 971 admission screening for Methicillin resistant *Staphylococcus aureus*. *PLoS ONE* 2011;6(3):e14783.  
44 972  
45 973  
46 974 60. Lee BY, Bailey RR, Smith KJ, et al. Universal methicillin-resistant *Staphylococcus aureus* (MRSA) surveillance  
47 975 for adults at hospital admission: an economic model and analysis. *Infect Control Hosp Epidemiol*  
48 976 2010;31(6):598-606.  
49 977  
50 978  
51 979 61. Collins J, Raza M, Ford M, et al. Review of a three-year methicillin-resistant *Staphylococcus aureus* screening  
52 980 programme. *J Hosp Infect.* 2011;78(2):81-5.  
53 981  
54 982  
55 983 62. Kirkland KB. Taking off the gloves: Towards a less dogmatic approach to the use of contact isolation.  
56 984 *Clinical Infectious Diseases* 2009;48:766-771.  
57 985  
58 986  
59  
60

1  
2  
3  
4  
5  
6  
7  
8  
9  
10  
11  
12  
13  
14  
15  
16  
17  
18  
19  
20  
21  
22  
23  
24  
25  
26  
27  
28  
29  
30  
31  
32  
33  
34  
35  
36  
37  
38  
39  
40  
41  
42  
43  
44  
45  
46  
47  
48  
49  
50  
51  
52  
53  
54  
55  
56  
57  
58  
59  
60

987 63. Health Protection Scotland: Protocol for CRA MRSA Screening National Rollout in Scotland. Glasgow: Health  
988 Protection Scotland; 2<sup>nd</sup> September 2011.  
989  
990  
991 64. Morgan DJ, Day HR, Furuno JP, et al. Improving efficiency in active surveillance for methicillin-resistant  
992 *Staphylococcus aureus* or vancomycin-resistant *Enterococcus* at hospital admission. *Infect Control Hosp*  
993 *Epidemiol* 2010; 31(12):1230-5.  
994  
995  
996 65. Gould IM, Reilly J, Bunyan D, et al. Costs of healthcare-associated methicillin-resistant *Staphylococcus*  
997 *aureus* and its control. *Clin Microbiol Infect*. 2010;16(12):1721-8.  
998  
999  
1000 66. Hetem DJ, de Ruyter SC, Buiting AG, et al. Preventing *Staphylococcus aureus* bacteremia and sepsis in  
1001 patients with *Staphylococcus aureus* colonization of intravascular catheters: a retrospective multicenter study  
1002 and meta-analysis. *Medicine* 2011;90(4):284-8.  
1003  
1004  
1005 67. Lucet JC, Regnier B. Screening and decolonization: does methicillin-susceptible *Staphylococcus aureus* hold  
1006 lessons for methicillin-resistant *S. aureus*? *Clin Infect Dis* 2010;51(5):585-90.  
1007  
1008  
1009 68. Gwizdala RA, Miller M, Bhat M, et al. *Staphylococcus aureus* colonization and infection among drug users:  
1010 identification of hidden networks. *Am J Public Health*. 2011;101(7):1268-76.  
1011  
1012  
1013 69. Saxena AK, Panhotra BR, Venkateshappa CK, et al. The impact of nasal carriage of methicillin-resistant and  
1014 methicillin-susceptible *Staphylococcus aureus* (MRSA & MSSA) on vascular access-related septicemia among  
1015 patients with type-II diabetes on dialysis. *Ren Fail*. 2002;24(6):763-777.  
1016  
1017  
1018  
1019  
1020  
1021  
1022  
1023  
1024  
1025  
1026  
1027  
1028  
1029  
1030  
1031  
1032  
1033  
1034  
1035  
1036  
1037  
1038  
1039  
1040  
1041  
1042  
1043

1  
2  
3 1044 **FIGURE LEGENDS**

4 1045 Footnotes in small plain script.  
5 1046

6 1047 **Figure 1: Study overview in accordance with the ORION statement†**

7 1048 † Recommended by the Outbreak Reports and Intervention Studies Of Nosocomial infection (ORION) statement. [31]

8 1049 \* '4C' antibiotics are clindamycin, ciprofloxacin (all fluoroquinolones), cephalosporins (all generations), co-amoxiclav.

9 1050 MRSA = Methicillin resistant *Staphylococcus aureus*; SAB = *Staphylococcus aureus* bacteraemia, AOBDDs = Acute occupied bed days; WTE =  
10 1051 Whole time equivalents calculated as 37.5 hours/week\*52 weeks = 1950 hours year<sup>-1</sup>. ICN = Infection control nurse; ICD = Infection control  
11 1052 doctor. ICU = Intensive Care Unit.  
12 1053

13 1054 **Figure 2: Rates of *S.aureus* bacteraemia by age-group, length of stay and days from admission**

14 1055 P < 0.01 for all linear regression lines. Note logarithmic scale for Length-of-stay. Linear trend fitted after logarithmic transformation.  
15 1056

16 1057 **Figure 3: Secular trends in prevalence density and all-cause 30-day mortality after *S. aureus* bacteraemia by  
17 1058 methicillin resistance and admitting department (MRSA only)**

18 1059 Data aggregated in 3 month blocks. Lines represent results of trend analysis, using Poisson regression with time (month) as sole  
19 1060 explanatory variable.  
20 1061

21 1062 **Figure 4: Adherence to MRSA admission testing during universal surveillance (August 2008 to December  
22 1063 2010)**

23 1064 \* Special study period (February 2010 to August 2010) involved a trial of axillae and groin swabs.  
24 1065

25 1066 **Figure 5: Observed trends and multivariate transfer model predictions (sum of lagged explanatory variables)  
26 1067 for prevalence density, hospital associated incidence density, 30-day mortality in MRSA bacteraemia and %  
27 1068 *S.aureus* bacteraemia involving MRSA  
28 1069**

|                                                                                                                                                                                                                                       |                                                                                                                                                                                                                                                                                                                                                                                                                                                                                                                                                                                                                                                                                                                                                                                                                                                                                                                                                                                                                                                                                                                                                                                                                                                                                                                                                                                                                                                                                                                                                                                                                                                                                                                                                                                                                                                                                                                                                                                                                                                                                                                                                                                                                                                                                                                                                                                                                                                                                                                                                                                                                                                                                                                                                                                                                                                                                                       |                                                                                                                                                                                                                                                                                                                                                                                                                                                                                                                                                                                                                                                                                                                                                                                  |                                            |                                                                                                                                                                                          |                                             |                                                                                                                                                                                                    |                   |                                                             |                           |                                                                                |                                           |                                                                                         |                             |                                                                                    |                            |                                                                                              |                            |                                                                                                     |                               |                                                                                                    |                    |                                                                                               |                          |                                                                                         |                   |                                                                                                      |
|---------------------------------------------------------------------------------------------------------------------------------------------------------------------------------------------------------------------------------------|-------------------------------------------------------------------------------------------------------------------------------------------------------------------------------------------------------------------------------------------------------------------------------------------------------------------------------------------------------------------------------------------------------------------------------------------------------------------------------------------------------------------------------------------------------------------------------------------------------------------------------------------------------------------------------------------------------------------------------------------------------------------------------------------------------------------------------------------------------------------------------------------------------------------------------------------------------------------------------------------------------------------------------------------------------------------------------------------------------------------------------------------------------------------------------------------------------------------------------------------------------------------------------------------------------------------------------------------------------------------------------------------------------------------------------------------------------------------------------------------------------------------------------------------------------------------------------------------------------------------------------------------------------------------------------------------------------------------------------------------------------------------------------------------------------------------------------------------------------------------------------------------------------------------------------------------------------------------------------------------------------------------------------------------------------------------------------------------------------------------------------------------------------------------------------------------------------------------------------------------------------------------------------------------------------------------------------------------------------------------------------------------------------------------------------------------------------------------------------------------------------------------------------------------------------------------------------------------------------------------------------------------------------------------------------------------------------------------------------------------------------------------------------------------------------------------------------------------------------------------------------------------------------|----------------------------------------------------------------------------------------------------------------------------------------------------------------------------------------------------------------------------------------------------------------------------------------------------------------------------------------------------------------------------------------------------------------------------------------------------------------------------------------------------------------------------------------------------------------------------------------------------------------------------------------------------------------------------------------------------------------------------------------------------------------------------------|--------------------------------------------|------------------------------------------------------------------------------------------------------------------------------------------------------------------------------------------|---------------------------------------------|----------------------------------------------------------------------------------------------------------------------------------------------------------------------------------------------------|-------------------|-------------------------------------------------------------|---------------------------|--------------------------------------------------------------------------------|-------------------------------------------|-----------------------------------------------------------------------------------------|-----------------------------|------------------------------------------------------------------------------------|----------------------------|----------------------------------------------------------------------------------------------|----------------------------|-----------------------------------------------------------------------------------------------------|-------------------------------|----------------------------------------------------------------------------------------------------|--------------------|-----------------------------------------------------------------------------------------------|--------------------------|-----------------------------------------------------------------------------------------|-------------------|------------------------------------------------------------------------------------------------------|
| <b>Setting:</b> 1000 bed tertiary referral centre and acute teaching hospital in North East Scotland. 16-bed ICU. 1 WTE ICD and 8 WTE ICNs, 2 Surveillance nurses, 1.84 WTE antibiotic pharmacists, 0.6 WTE prescribing data analyst. | <b>Dates:</b> 1 <sup>st</sup> January 2006 to 31 <sup>st</sup> December 2010.                                                                                                                                                                                                                                                                                                                                                                                                                                                                                                                                                                                                                                                                                                                                                                                                                                                                                                                                                                                                                                                                                                                                                                                                                                                                                                                                                                                                                                                                                                                                                                                                                                                                                                                                                                                                                                                                                                                                                                                                                                                                                                                                                                                                                                                                                                                                                                                                                                                                                                                                                                                                                                                                                                                                                                                                                         | <b>Population:</b> 420,452 consecutive, unselected admissions with average monthly AOBDS of 23,834 (range 19,847 to 26,351). Average length-of-stay 3.8 days, bed-occupancy 78%. Endemic MRSA (E15 and E16), mean prevalence density 1.63 cases/1000 AOBDS                                                                                                                                                                                                                                                                                                                                                                                                                                                                                                                       |                                            |                                                                                                                                                                                          |                                             |                                                                                                                                                                                                    |                   |                                                             |                           |                                                                                |                                           |                                                                                         |                             |                                                                                    |                            |                                                                                              |                            |                                                                                                     |                               |                                                                                                    |                    |                                                                                               |                          |                                                                                         |                   |                                                                                                      |
| <b>Study period</b>                                                                                                                                                                                                                   | <b>5- year retrospective cohort: January 2006 to December 2010</b><br>Cohort: All admission to acute specialities at Aberdeen Royal Infirmary, including Follow-up: 180 days from bacteraemia, or 2 wks post-discharge (whichever is longest). Ended 15 <sup>th</sup> June 2011.<br>Data collection period: 15 <sup>th</sup> June 2011 to 1 <sup>st</sup> August 2011.                                                                                                                                                                                                                                                                                                                                                                                                                                                                                                                                                                                                                                                                                                                                                                                                                                                                                                                                                                                                                                                                                                                                                                                                                                                                                                                                                                                                                                                                                                                                                                                                                                                                                                                                                                                                                                                                                                                                                                                                                                                                                                                                                                                                                                                                                                                                                                                                                                                                                                                                |                                                                                                                                                                                                                                                                                                                                                                                                                                                                                                                                                                                                                                                                                                                                                                                  |                                            |                                                                                                                                                                                          |                                             |                                                                                                                                                                                                    |                   |                                                             |                           |                                                                                |                                           |                                                                                         |                             |                                                                                    |                            |                                                                                              |                            |                                                                                                     |                               |                                                                                                    |                    |                                                                                               |                          |                                                                                         |                   |                                                                                                      |
| <b>MRSA screening policy</b>                                                                                                                                                                                                          | <b>Period 1: 31 months (Jan 2006 - July 2008)</b><br>Selective screening for elective surgery and ICU admissions. 43,158 (43%) admissions screened<br>2909 (6.9% of screened) MRSA screen positive                                                                                                                                                                                                                                                                                                                                                                                                                                                                                                                                                                                                                                                                                                                                                                                                                                                                                                                                                                                                                                                                                                                                                                                                                                                                                                                                                                                                                                                                                                                                                                                                                                                                                                                                                                                                                                                                                                                                                                                                                                                                                                                                                                                                                                                                                                                                                                                                                                                                                                                                                                                                                                                                                                    | <b>Period 2: 29 months (August 2009- December 2011)</b><br>All adult medical, surgical and ICU overnight admissions. 86,890 (87%) admissions screened.<br>2694 (3.1% of screened) MRSA screen positive                                                                                                                                                                                                                                                                                                                                                                                                                                                                                                                                                                           |                                            |                                                                                                                                                                                          |                                             |                                                                                                                                                                                                    |                   |                                                             |                           |                                                                                |                                           |                                                                                         |                             |                                                                                    |                            |                                                                                              |                            |                                                                                                     |                               |                                                                                                    |                    |                                                                                               |                          |                                                                                         |                   |                                                                                                      |
| <b>Isolation</b>                                                                                                                                                                                                                      | Isolation (single-room) or cohorting (without dedicated staff) of all patients MRSA positive at admission.                                                                                                                                                                                                                                                                                                                                                                                                                                                                                                                                                                                                                                                                                                                                                                                                                                                                                                                                                                                                                                                                                                                                                                                                                                                                                                                                                                                                                                                                                                                                                                                                                                                                                                                                                                                                                                                                                                                                                                                                                                                                                                                                                                                                                                                                                                                                                                                                                                                                                                                                                                                                                                                                                                                                                                                            | As period 1.                                                                                                                                                                                                                                                                                                                                                                                                                                                                                                                                                                                                                                                                                                                                                                     |                                            |                                                                                                                                                                                          |                                             |                                                                                                                                                                                                    |                   |                                                             |                           |                                                                                |                                           |                                                                                         |                             |                                                                                    |                            |                                                                                              |                            |                                                                                                     |                               |                                                                                                    |                    |                                                                                               |                          |                                                                                         |                   |                                                                                                      |
| <b>Decolonisation</b>                                                                                                                                                                                                                 | Decolonisation of MRSA-positive patients admitted to high-risk specialities with 5 days chlorhexidine body washes and intra-nasal mupirocin. Clearance defined by three consecutive negative swabs > 48hrs apart.                                                                                                                                                                                                                                                                                                                                                                                                                                                                                                                                                                                                                                                                                                                                                                                                                                                                                                                                                                                                                                                                                                                                                                                                                                                                                                                                                                                                                                                                                                                                                                                                                                                                                                                                                                                                                                                                                                                                                                                                                                                                                                                                                                                                                                                                                                                                                                                                                                                                                                                                                                                                                                                                                     | Decolonisation with same regimen as period 1 of all MRSA-positive patients admitted to <i>any</i> speciality. (see supplemental file 1)                                                                                                                                                                                                                                                                                                                                                                                                                                                                                                                                                                                                                                          |                                            |                                                                                                                                                                                          |                                             |                                                                                                                                                                                                    |                   |                                                             |                           |                                                                                |                                           |                                                                                         |                             |                                                                                    |                            |                                                                                              |                            |                                                                                                     |                               |                                                                                                    |                    |                                                                                               |                          |                                                                                         |                   |                                                                                                      |
| <b>General Infection control</b>                                                                                                                                                                                                      | Alcohol-based hand-rub for hand-disinfection, and standardised ward-based auditing of compliance. Improvements in compliance after national hand-hygiene campaign (January 2007).                                                                                                                                                                                                                                                                                                                                                                                                                                                                                                                                                                                                                                                                                                                                                                                                                                                                                                                                                                                                                                                                                                                                                                                                                                                                                                                                                                                                                                                                                                                                                                                                                                                                                                                                                                                                                                                                                                                                                                                                                                                                                                                                                                                                                                                                                                                                                                                                                                                                                                                                                                                                                                                                                                                     | As period 1.<br><br>Hand-hygiene compliance high and stable.                                                                                                                                                                                                                                                                                                                                                                                                                                                                                                                                                                                                                                                                                                                     |                                            |                                                                                                                                                                                          |                                             |                                                                                                                                                                                                    |                   |                                                             |                           |                                                                                |                                           |                                                                                         |                             |                                                                                    |                            |                                                                                              |                            |                                                                                                     |                               |                                                                                                    |                    |                                                                                               |                          |                                                                                         |                   |                                                                                                      |
| <b>Antibiotic policy</b>                                                                                                                                                                                                              | Annual reviews of hospital empirical antibiotic therapy guidelines (revisions April 2007 and April 2008).                                                                                                                                                                                                                                                                                                                                                                                                                                                                                                                                                                                                                                                                                                                                                                                                                                                                                                                                                                                                                                                                                                                                                                                                                                                                                                                                                                                                                                                                                                                                                                                                                                                                                                                                                                                                                                                                                                                                                                                                                                                                                                                                                                                                                                                                                                                                                                                                                                                                                                                                                                                                                                                                                                                                                                                             | Revision of empirical antibiotic therapy guidelines (May 2009) recommending regimens avoiding '4C'* antibiotics and restricted supply of these antibiotics requiring permissions from medical microbiology and pharmacy (see supplemental file 2).<br><br><u>Antibiotic groups during antibiotic stewardship intervention:</u><br><i>Macrolides and '4C' antibiotics:</i> Co-amoxiclav, cephalosporins, ciprofloxacin/fluoroquinolones, clindamycin<br><i>Targeted for increase :</i> Amoxicillin, aminoglycosides, co-trimoxazole, piperacillin/tazobactam, flucloxacillin,<br><i>Non-target (control):</i> Tetracyclines, trimethoprim, nitrofurantoin, $\beta$ -lactamase sensitive penicillins, other.<br><i>Therapeutics for MRSA:</i> Teicoplanin, vancomycin, daptomycin. |                                            |                                                                                                                                                                                          |                                             |                                                                                                                                                                                                    |                   |                                                             |                           |                                                                                |                                           |                                                                                         |                             |                                                                                    |                            |                                                                                              |                            |                                                                                                     |                               |                                                                                                    |                    |                                                                                               |                          |                                                                                         |                   |                                                                                                      |
| <b>Definitions and outcomes</b>                                                                                                                                                                                                       | <table border="1"> <tr> <td data-bbox="355 1115 571 1171"><b>Case of <i>S.aureus</i> bacteraemia</b></td> <td data-bbox="571 1115 1444 1171">Non-duplicate isolate of any <i>S.aureus</i> from <math>\geq 1</math> blood culture bottle at any point during admission. Cultures from the same patient <math>\leq 14</math> days considered as same episode.</td> </tr> <tr> <td data-bbox="355 1171 571 1227"><b>Hospital-associated (HA)-bacteraemia</b></td> <td data-bbox="571 1171 1444 1227">Isolation of <i>S.aureus</i> from blood-cultures &gt; 48 hours after admission or <math>\leq 14</math> days of discharge in any patient without a history of bacteraemia or MRSA/MSSA infection or colonisation.</td> </tr> <tr> <td data-bbox="355 1227 571 1261"><b>Prevalence</b></td> <td data-bbox="571 1227 1444 1261">Monthly episodes of SAB / Monthly total admissions (x 1000)</td> </tr> <tr> <td data-bbox="355 1261 571 1294"><b>Prevalence density</b></td> <td data-bbox="571 1261 1444 1294">Monthly episodes of <i>S.aureus</i> bacteraemia / Monthly total AOBDS (x 1000)</td> </tr> <tr> <td data-bbox="355 1294 571 1328"><b>Hospital-associated (HA)-incidence</b></td> <td data-bbox="571 1294 1444 1328">Monthly episodes of HA-<i>S.aureus</i> bacteraemia / Monthly total admissions (x 1000)</td> </tr> <tr> <td data-bbox="355 1328 571 1361"><b>HA-incidence density</b></td> <td data-bbox="571 1328 1444 1361">Monthly episodes of HA-<i>S.aureus</i> bacteraemia / Monthly total AOBDS (x 1000)</td> </tr> <tr> <td data-bbox="355 1361 571 1395"><b>%SAB involving MRSA</b></td> <td data-bbox="571 1361 1444 1395">Monthly episodes of MRSA bacteraemia/Monthly episodes of <i>S.aureus</i> bacteraemia (x 100)</td> </tr> <tr> <td data-bbox="355 1395 571 1429"><b>30-day mortality, %</b></td> <td data-bbox="571 1395 1444 1429">Deaths from any cause <math>\leq 30</math> days of SAB/ No. of episodes of <i>S.aureus</i> bacteraemia (x 100)</td> </tr> <tr> <td data-bbox="355 1429 571 1462"><b>Inpatient mortality, %</b></td> <td data-bbox="571 1429 1444 1462">Deaths from any cause in index admissions / No. of episodes of <i>S.aureus</i> bacteraemia (x 100)</td> </tr> <tr> <td data-bbox="355 1462 571 1496"><b>Readmission</b></td> <td data-bbox="571 1462 1444 1496">Readmission to inpatient care at any hospital <math>\leq 14</math> days of discharge of index admission.</td> </tr> <tr> <td data-bbox="355 1496 571 1529"><b>Treatment failure</b></td> <td data-bbox="571 1496 1444 1529">Any repeat blood culture isolate of <i>S.aureus</i> <math>\leq 6</math> months of initial isolate.</td> </tr> <tr> <td data-bbox="355 1529 571 1563"><b>Recurrence</b></td> <td data-bbox="571 1529 1444 1563">Repeat blood isolate of <i>S.aureus</i> with the same susceptibility &gt;6 months from initial isolate.</td> </tr> </table> |                                                                                                                                                                                                                                                                                                                                                                                                                                                                                                                                                                                                                                                                                                                                                                                  | <b>Case of <i>S.aureus</i> bacteraemia</b> | Non-duplicate isolate of any <i>S.aureus</i> from $\geq 1$ blood culture bottle at any point during admission. Cultures from the same patient $\leq 14$ days considered as same episode. | <b>Hospital-associated (HA)-bacteraemia</b> | Isolation of <i>S.aureus</i> from blood-cultures > 48 hours after admission or $\leq 14$ days of discharge in any patient without a history of bacteraemia or MRSA/MSSA infection or colonisation. | <b>Prevalence</b> | Monthly episodes of SAB / Monthly total admissions (x 1000) | <b>Prevalence density</b> | Monthly episodes of <i>S.aureus</i> bacteraemia / Monthly total AOBDS (x 1000) | <b>Hospital-associated (HA)-incidence</b> | Monthly episodes of HA- <i>S.aureus</i> bacteraemia / Monthly total admissions (x 1000) | <b>HA-incidence density</b> | Monthly episodes of HA- <i>S.aureus</i> bacteraemia / Monthly total AOBDS (x 1000) | <b>%SAB involving MRSA</b> | Monthly episodes of MRSA bacteraemia/Monthly episodes of <i>S.aureus</i> bacteraemia (x 100) | <b>30-day mortality, %</b> | Deaths from any cause $\leq 30$ days of SAB/ No. of episodes of <i>S.aureus</i> bacteraemia (x 100) | <b>Inpatient mortality, %</b> | Deaths from any cause in index admissions / No. of episodes of <i>S.aureus</i> bacteraemia (x 100) | <b>Readmission</b> | Readmission to inpatient care at any hospital $\leq 14$ days of discharge of index admission. | <b>Treatment failure</b> | Any repeat blood culture isolate of <i>S.aureus</i> $\leq 6$ months of initial isolate. | <b>Recurrence</b> | Repeat blood isolate of <i>S.aureus</i> with the same susceptibility >6 months from initial isolate. |
| <b>Case of <i>S.aureus</i> bacteraemia</b>                                                                                                                                                                                            | Non-duplicate isolate of any <i>S.aureus</i> from $\geq 1$ blood culture bottle at any point during admission. Cultures from the same patient $\leq 14$ days considered as same episode.                                                                                                                                                                                                                                                                                                                                                                                                                                                                                                                                                                                                                                                                                                                                                                                                                                                                                                                                                                                                                                                                                                                                                                                                                                                                                                                                                                                                                                                                                                                                                                                                                                                                                                                                                                                                                                                                                                                                                                                                                                                                                                                                                                                                                                                                                                                                                                                                                                                                                                                                                                                                                                                                                                              |                                                                                                                                                                                                                                                                                                                                                                                                                                                                                                                                                                                                                                                                                                                                                                                  |                                            |                                                                                                                                                                                          |                                             |                                                                                                                                                                                                    |                   |                                                             |                           |                                                                                |                                           |                                                                                         |                             |                                                                                    |                            |                                                                                              |                            |                                                                                                     |                               |                                                                                                    |                    |                                                                                               |                          |                                                                                         |                   |                                                                                                      |
| <b>Hospital-associated (HA)-bacteraemia</b>                                                                                                                                                                                           | Isolation of <i>S.aureus</i> from blood-cultures > 48 hours after admission or $\leq 14$ days of discharge in any patient without a history of bacteraemia or MRSA/MSSA infection or colonisation.                                                                                                                                                                                                                                                                                                                                                                                                                                                                                                                                                                                                                                                                                                                                                                                                                                                                                                                                                                                                                                                                                                                                                                                                                                                                                                                                                                                                                                                                                                                                                                                                                                                                                                                                                                                                                                                                                                                                                                                                                                                                                                                                                                                                                                                                                                                                                                                                                                                                                                                                                                                                                                                                                                    |                                                                                                                                                                                                                                                                                                                                                                                                                                                                                                                                                                                                                                                                                                                                                                                  |                                            |                                                                                                                                                                                          |                                             |                                                                                                                                                                                                    |                   |                                                             |                           |                                                                                |                                           |                                                                                         |                             |                                                                                    |                            |                                                                                              |                            |                                                                                                     |                               |                                                                                                    |                    |                                                                                               |                          |                                                                                         |                   |                                                                                                      |
| <b>Prevalence</b>                                                                                                                                                                                                                     | Monthly episodes of SAB / Monthly total admissions (x 1000)                                                                                                                                                                                                                                                                                                                                                                                                                                                                                                                                                                                                                                                                                                                                                                                                                                                                                                                                                                                                                                                                                                                                                                                                                                                                                                                                                                                                                                                                                                                                                                                                                                                                                                                                                                                                                                                                                                                                                                                                                                                                                                                                                                                                                                                                                                                                                                                                                                                                                                                                                                                                                                                                                                                                                                                                                                           |                                                                                                                                                                                                                                                                                                                                                                                                                                                                                                                                                                                                                                                                                                                                                                                  |                                            |                                                                                                                                                                                          |                                             |                                                                                                                                                                                                    |                   |                                                             |                           |                                                                                |                                           |                                                                                         |                             |                                                                                    |                            |                                                                                              |                            |                                                                                                     |                               |                                                                                                    |                    |                                                                                               |                          |                                                                                         |                   |                                                                                                      |
| <b>Prevalence density</b>                                                                                                                                                                                                             | Monthly episodes of <i>S.aureus</i> bacteraemia / Monthly total AOBDS (x 1000)                                                                                                                                                                                                                                                                                                                                                                                                                                                                                                                                                                                                                                                                                                                                                                                                                                                                                                                                                                                                                                                                                                                                                                                                                                                                                                                                                                                                                                                                                                                                                                                                                                                                                                                                                                                                                                                                                                                                                                                                                                                                                                                                                                                                                                                                                                                                                                                                                                                                                                                                                                                                                                                                                                                                                                                                                        |                                                                                                                                                                                                                                                                                                                                                                                                                                                                                                                                                                                                                                                                                                                                                                                  |                                            |                                                                                                                                                                                          |                                             |                                                                                                                                                                                                    |                   |                                                             |                           |                                                                                |                                           |                                                                                         |                             |                                                                                    |                            |                                                                                              |                            |                                                                                                     |                               |                                                                                                    |                    |                                                                                               |                          |                                                                                         |                   |                                                                                                      |
| <b>Hospital-associated (HA)-incidence</b>                                                                                                                                                                                             | Monthly episodes of HA- <i>S.aureus</i> bacteraemia / Monthly total admissions (x 1000)                                                                                                                                                                                                                                                                                                                                                                                                                                                                                                                                                                                                                                                                                                                                                                                                                                                                                                                                                                                                                                                                                                                                                                                                                                                                                                                                                                                                                                                                                                                                                                                                                                                                                                                                                                                                                                                                                                                                                                                                                                                                                                                                                                                                                                                                                                                                                                                                                                                                                                                                                                                                                                                                                                                                                                                                               |                                                                                                                                                                                                                                                                                                                                                                                                                                                                                                                                                                                                                                                                                                                                                                                  |                                            |                                                                                                                                                                                          |                                             |                                                                                                                                                                                                    |                   |                                                             |                           |                                                                                |                                           |                                                                                         |                             |                                                                                    |                            |                                                                                              |                            |                                                                                                     |                               |                                                                                                    |                    |                                                                                               |                          |                                                                                         |                   |                                                                                                      |
| <b>HA-incidence density</b>                                                                                                                                                                                                           | Monthly episodes of HA- <i>S.aureus</i> bacteraemia / Monthly total AOBDS (x 1000)                                                                                                                                                                                                                                                                                                                                                                                                                                                                                                                                                                                                                                                                                                                                                                                                                                                                                                                                                                                                                                                                                                                                                                                                                                                                                                                                                                                                                                                                                                                                                                                                                                                                                                                                                                                                                                                                                                                                                                                                                                                                                                                                                                                                                                                                                                                                                                                                                                                                                                                                                                                                                                                                                                                                                                                                                    |                                                                                                                                                                                                                                                                                                                                                                                                                                                                                                                                                                                                                                                                                                                                                                                  |                                            |                                                                                                                                                                                          |                                             |                                                                                                                                                                                                    |                   |                                                             |                           |                                                                                |                                           |                                                                                         |                             |                                                                                    |                            |                                                                                              |                            |                                                                                                     |                               |                                                                                                    |                    |                                                                                               |                          |                                                                                         |                   |                                                                                                      |
| <b>%SAB involving MRSA</b>                                                                                                                                                                                                            | Monthly episodes of MRSA bacteraemia/Monthly episodes of <i>S.aureus</i> bacteraemia (x 100)                                                                                                                                                                                                                                                                                                                                                                                                                                                                                                                                                                                                                                                                                                                                                                                                                                                                                                                                                                                                                                                                                                                                                                                                                                                                                                                                                                                                                                                                                                                                                                                                                                                                                                                                                                                                                                                                                                                                                                                                                                                                                                                                                                                                                                                                                                                                                                                                                                                                                                                                                                                                                                                                                                                                                                                                          |                                                                                                                                                                                                                                                                                                                                                                                                                                                                                                                                                                                                                                                                                                                                                                                  |                                            |                                                                                                                                                                                          |                                             |                                                                                                                                                                                                    |                   |                                                             |                           |                                                                                |                                           |                                                                                         |                             |                                                                                    |                            |                                                                                              |                            |                                                                                                     |                               |                                                                                                    |                    |                                                                                               |                          |                                                                                         |                   |                                                                                                      |
| <b>30-day mortality, %</b>                                                                                                                                                                                                            | Deaths from any cause $\leq 30$ days of SAB/ No. of episodes of <i>S.aureus</i> bacteraemia (x 100)                                                                                                                                                                                                                                                                                                                                                                                                                                                                                                                                                                                                                                                                                                                                                                                                                                                                                                                                                                                                                                                                                                                                                                                                                                                                                                                                                                                                                                                                                                                                                                                                                                                                                                                                                                                                                                                                                                                                                                                                                                                                                                                                                                                                                                                                                                                                                                                                                                                                                                                                                                                                                                                                                                                                                                                                   |                                                                                                                                                                                                                                                                                                                                                                                                                                                                                                                                                                                                                                                                                                                                                                                  |                                            |                                                                                                                                                                                          |                                             |                                                                                                                                                                                                    |                   |                                                             |                           |                                                                                |                                           |                                                                                         |                             |                                                                                    |                            |                                                                                              |                            |                                                                                                     |                               |                                                                                                    |                    |                                                                                               |                          |                                                                                         |                   |                                                                                                      |
| <b>Inpatient mortality, %</b>                                                                                                                                                                                                         | Deaths from any cause in index admissions / No. of episodes of <i>S.aureus</i> bacteraemia (x 100)                                                                                                                                                                                                                                                                                                                                                                                                                                                                                                                                                                                                                                                                                                                                                                                                                                                                                                                                                                                                                                                                                                                                                                                                                                                                                                                                                                                                                                                                                                                                                                                                                                                                                                                                                                                                                                                                                                                                                                                                                                                                                                                                                                                                                                                                                                                                                                                                                                                                                                                                                                                                                                                                                                                                                                                                    |                                                                                                                                                                                                                                                                                                                                                                                                                                                                                                                                                                                                                                                                                                                                                                                  |                                            |                                                                                                                                                                                          |                                             |                                                                                                                                                                                                    |                   |                                                             |                           |                                                                                |                                           |                                                                                         |                             |                                                                                    |                            |                                                                                              |                            |                                                                                                     |                               |                                                                                                    |                    |                                                                                               |                          |                                                                                         |                   |                                                                                                      |
| <b>Readmission</b>                                                                                                                                                                                                                    | Readmission to inpatient care at any hospital $\leq 14$ days of discharge of index admission.                                                                                                                                                                                                                                                                                                                                                                                                                                                                                                                                                                                                                                                                                                                                                                                                                                                                                                                                                                                                                                                                                                                                                                                                                                                                                                                                                                                                                                                                                                                                                                                                                                                                                                                                                                                                                                                                                                                                                                                                                                                                                                                                                                                                                                                                                                                                                                                                                                                                                                                                                                                                                                                                                                                                                                                                         |                                                                                                                                                                                                                                                                                                                                                                                                                                                                                                                                                                                                                                                                                                                                                                                  |                                            |                                                                                                                                                                                          |                                             |                                                                                                                                                                                                    |                   |                                                             |                           |                                                                                |                                           |                                                                                         |                             |                                                                                    |                            |                                                                                              |                            |                                                                                                     |                               |                                                                                                    |                    |                                                                                               |                          |                                                                                         |                   |                                                                                                      |
| <b>Treatment failure</b>                                                                                                                                                                                                              | Any repeat blood culture isolate of <i>S.aureus</i> $\leq 6$ months of initial isolate.                                                                                                                                                                                                                                                                                                                                                                                                                                                                                                                                                                                                                                                                                                                                                                                                                                                                                                                                                                                                                                                                                                                                                                                                                                                                                                                                                                                                                                                                                                                                                                                                                                                                                                                                                                                                                                                                                                                                                                                                                                                                                                                                                                                                                                                                                                                                                                                                                                                                                                                                                                                                                                                                                                                                                                                                               |                                                                                                                                                                                                                                                                                                                                                                                                                                                                                                                                                                                                                                                                                                                                                                                  |                                            |                                                                                                                                                                                          |                                             |                                                                                                                                                                                                    |                   |                                                             |                           |                                                                                |                                           |                                                                                         |                             |                                                                                    |                            |                                                                                              |                            |                                                                                                     |                               |                                                                                                    |                    |                                                                                               |                          |                                                                                         |                   |                                                                                                      |
| <b>Recurrence</b>                                                                                                                                                                                                                     | Repeat blood isolate of <i>S.aureus</i> with the same susceptibility >6 months from initial isolate.                                                                                                                                                                                                                                                                                                                                                                                                                                                                                                                                                                                                                                                                                                                                                                                                                                                                                                                                                                                                                                                                                                                                                                                                                                                                                                                                                                                                                                                                                                                                                                                                                                                                                                                                                                                                                                                                                                                                                                                                                                                                                                                                                                                                                                                                                                                                                                                                                                                                                                                                                                                                                                                                                                                                                                                                  |                                                                                                                                                                                                                                                                                                                                                                                                                                                                                                                                                                                                                                                                                                                                                                                  |                                            |                                                                                                                                                                                          |                                             |                                                                                                                                                                                                    |                   |                                                             |                           |                                                                                |                                           |                                                                                         |                             |                                                                                    |                            |                                                                                              |                            |                                                                                                     |                               |                                                                                                    |                    |                                                                                               |                          |                                                                                         |                   |                                                                                                      |

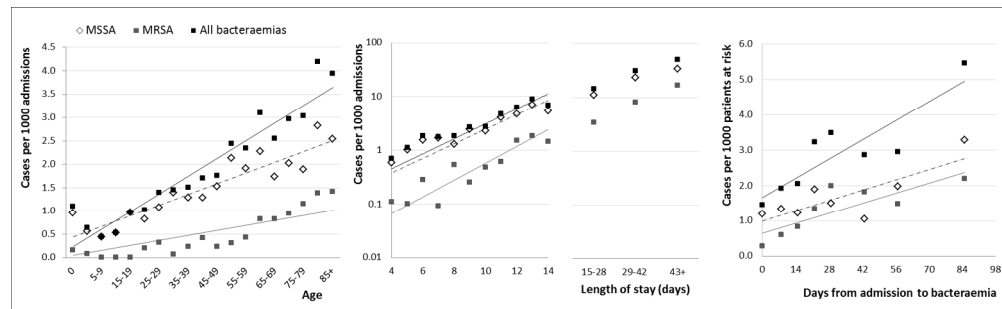

Rates of *S.aureus* bacteraemia by age-group, length of stay and days from admission  
 $P < 0.01$  for all linear regression lines. Note logarithmic scale for Length-of-stay. Linear trend fitted after logarithmic transformation.

peer review only



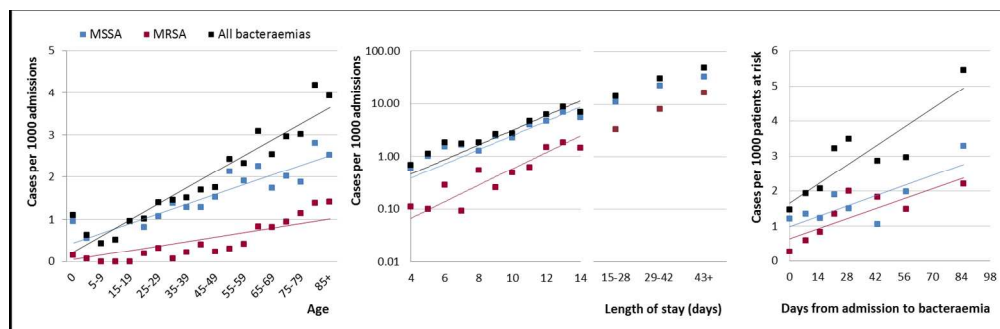

Rates of *S.aureus* bacteraemia by age-group, length of stay and days from admission  
 $P < 0.01$  for all linear regression lines. Note logarithmic scale for Length-of-stay. Linear trend fitted after logarithmic transformation.

peer review only

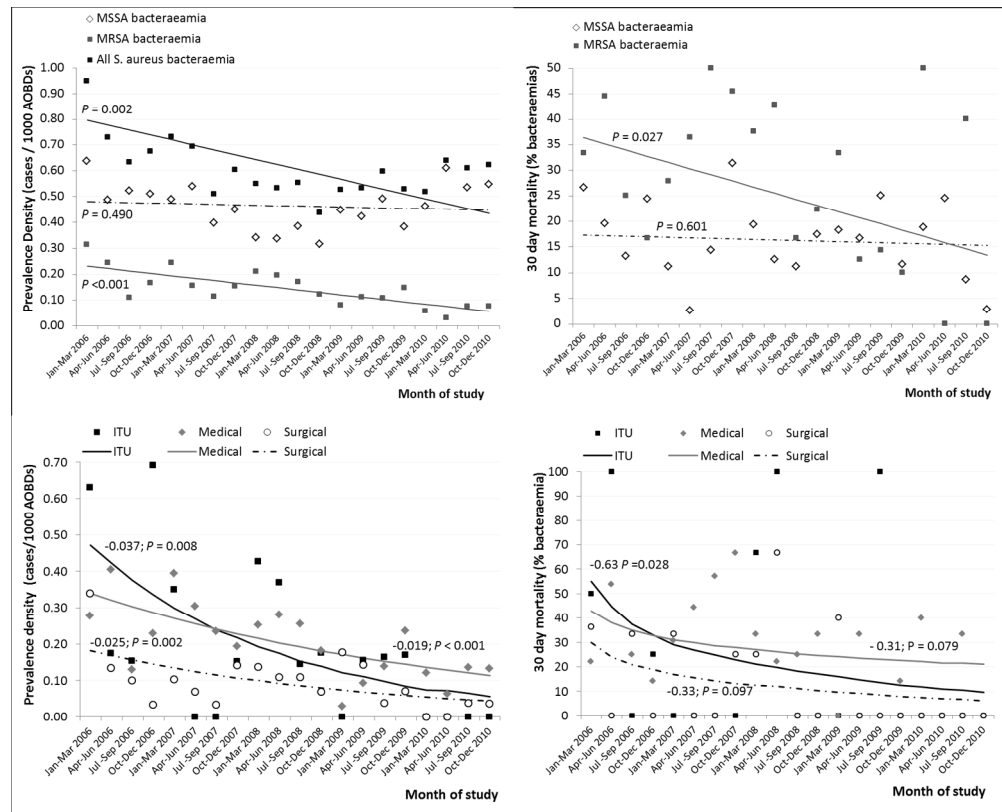

Secular trends in prevalence density and all-cause 30-day mortality after *S. aureus* bacteraemia by methicillin resistance and admitting department (MRSA only)  
Data aggregated in 3 month blocks. Lines represent results of trend analysis, using Poisson regression with time (month) as sole explanatory variable.

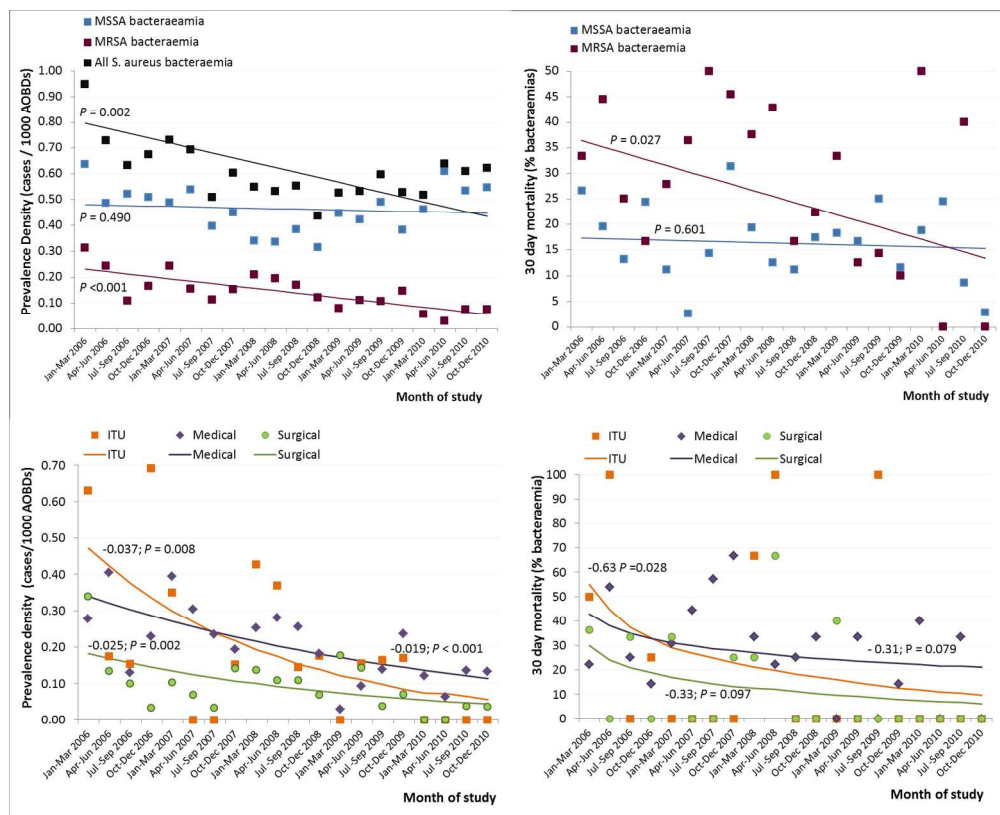

Secular trends in prevalence density and all-cause 30-day mortality after *S. aureus* bacteraemia by methicillin resistance and admitting department (MRSA only)  
 Data aggregated in 3 month blocks. Lines represent results of trend analysis, using Poisson regression with time (month) as sole explanatory variable.

1  
2  
3  
4  
5  
6  
7  
8  
9  
10  
11  
12  
13  
14  
15  
16  
17  
18  
19  
20  
21  
22  
23  
24  
25  
26  
27  
28  
29  
30  
31  
32  
33  
34  
35  
36  
37  
38  
39  
40  
41  
42  
43  
44  
45  
46  
47  
48  
49  
50  
51  
52  
53  
54  
55  
56  
57  
58  
59  
60

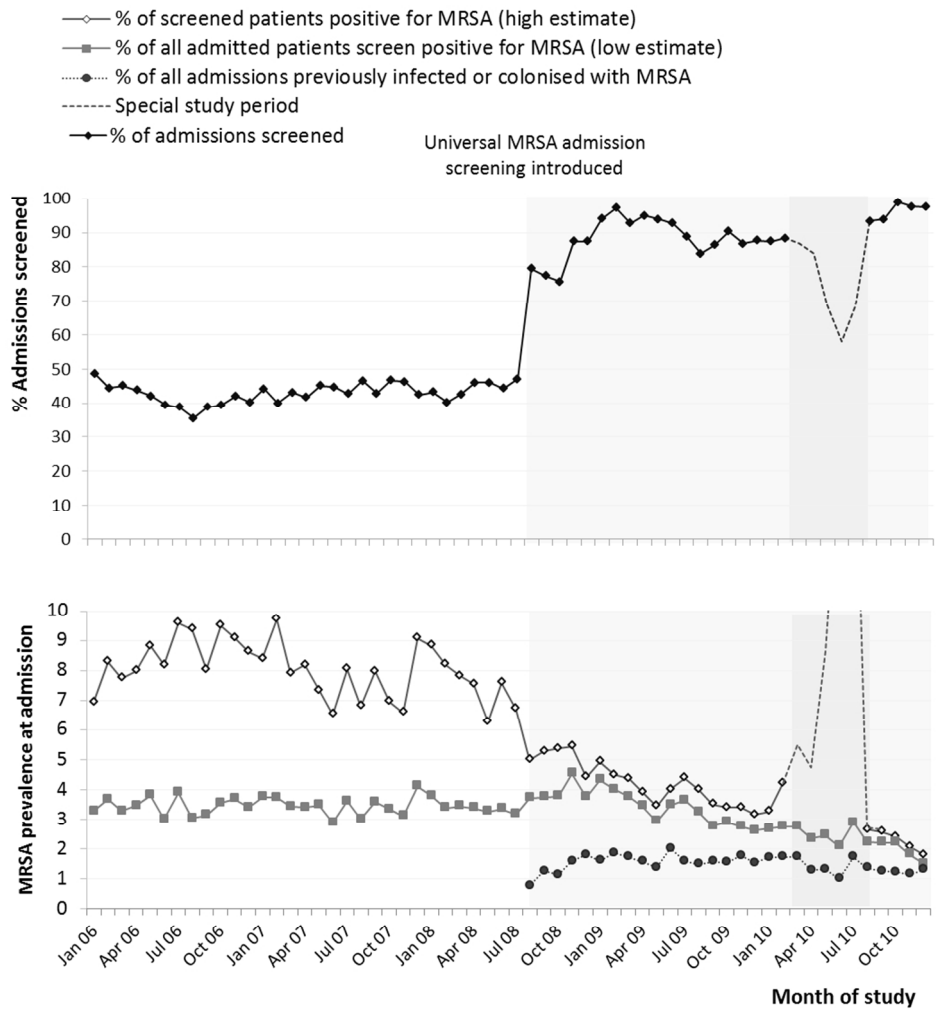

Adherence to MRSA admission testing during universal surveillance (August 2008 to December 2010) \*A special study period (February 2010 to August 2010) involved a trial of axillae and groin swabs.

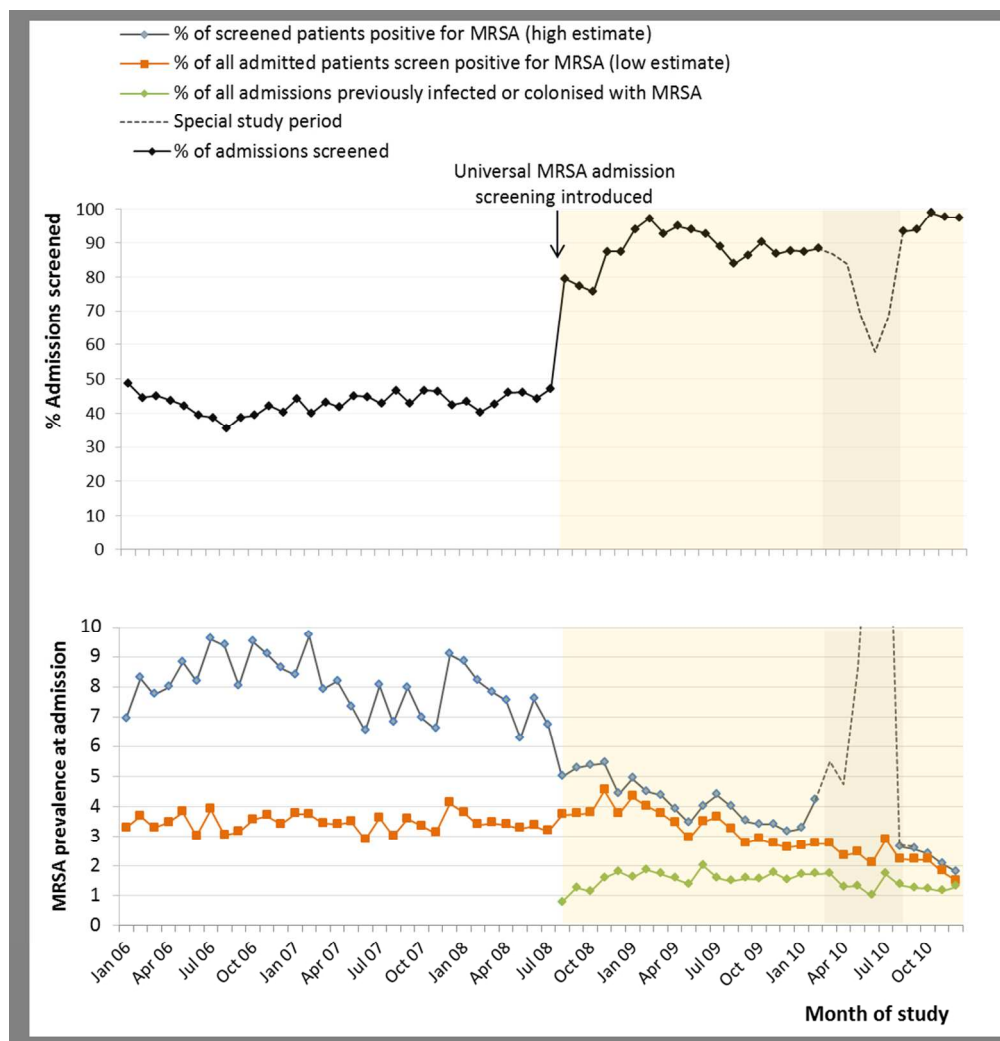

Adherence to MRSA admission testing during universal surveillance (August 2008 to December 2010) \*A special study period (February 2010 to August 2010) involved a trial of axillae and groin swabs.

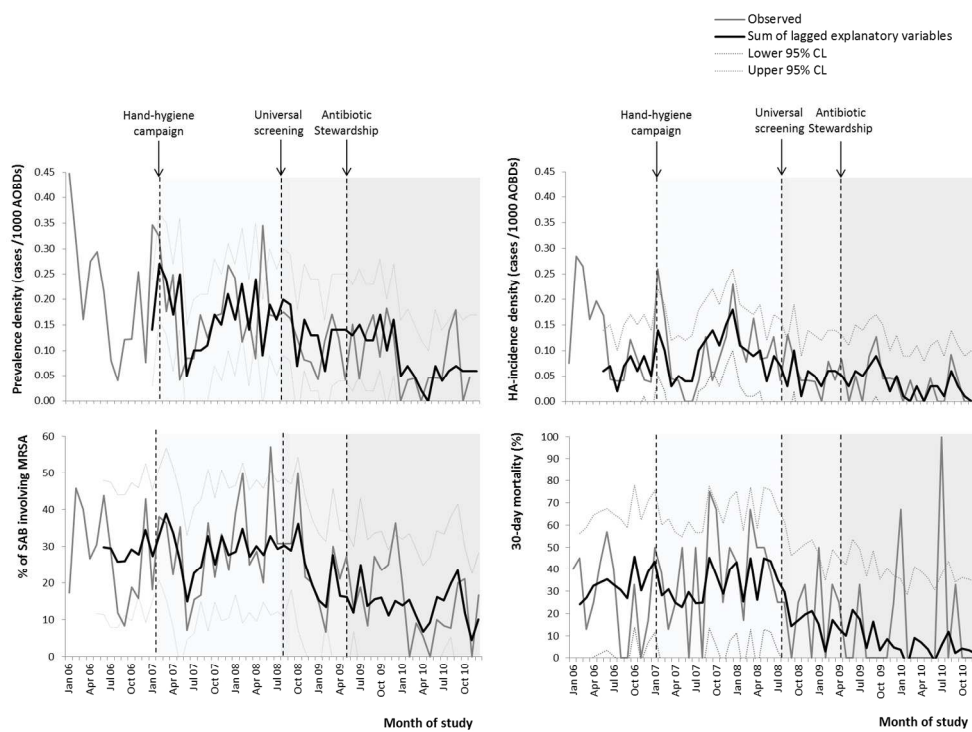

Observed trends and multivariate transfer model predictions (sum of lagged explanatory variables) for prevalence density, hospital associated incidence density, 30-day mortality in MRSA bacteraemia, and % *S.aureus* bacteraemia involving MRSA.

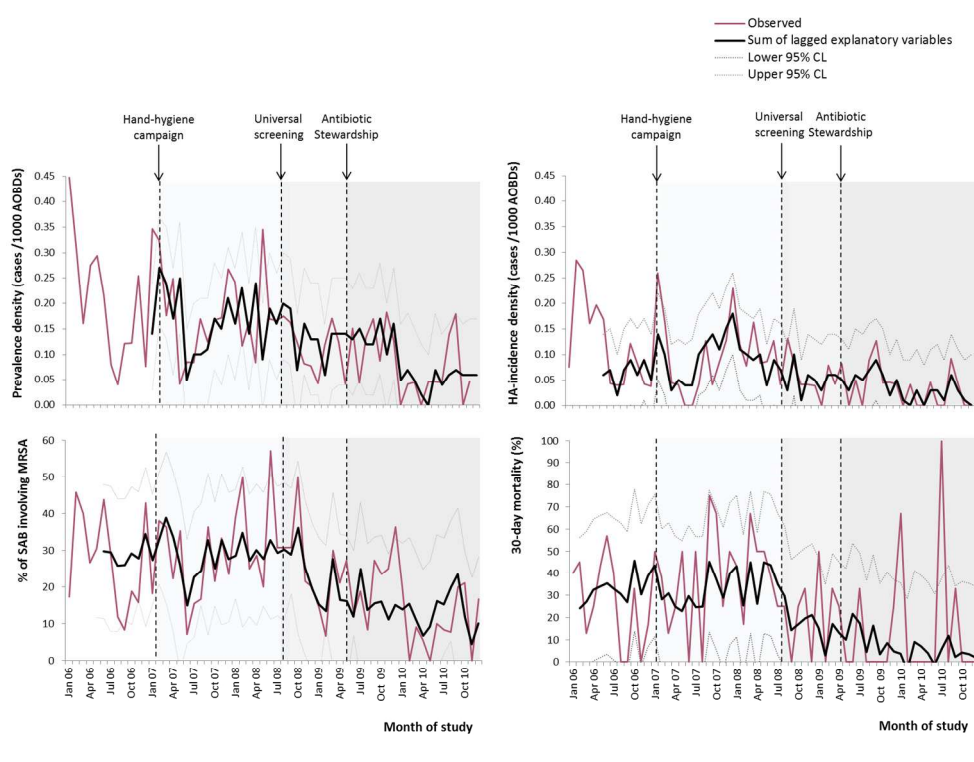

Observed trends and multivariate transfer model predictions (sum of lagged explanatory variables) for prevalence density, hospital associated incidence density, 30-day mortality in MRSA bacteraemia, and % *S.aureus* bacteraemia involving MRSA.
